# Supplementary material
Source: PubMed Central journal article supplement (PMC8462495)
Supplement: ehp8716.s001.acco.pdf [file ehp8716.s001.acco.pdf]

**Note to readers with disabilities:** *EHP* strives to ensure that all journal content is accessible to all readers. However, some figures and Supplemental Material published in *EHP* articles may not conform to [508 standards](#) due to the complexity of the information being presented. If you need assistance accessing journal content, please contact [ehp508@niehs.nih.gov](mailto:ehp508@niehs.nih.gov). Our staff will work with you to assess and meet your accessibility needs within 3 working days.

### **Supplemental Material**

#### **Exposure to Air Pollution in Relation to Risk of Dementia and Related Outcomes: An Updated Systematic Review of the Epidemiological Literature**

Jennifer Weuve, Erin E. Bennett, Lysie Ranker, Kan Z. Gianattasio, Meredith Pedde, Sara D. Adar, Jeff D. Yanosky, and Melinda C. Power

#### **Table of Contents**

**Table 1.** Summary of study characteristics for eligible studies on air pollution and late-life cognitive health identified through December 31, 2020 (**also available in the manuscript, in alternate format**).

**Table 2.** Summary of quality assessment for eligible studies on air pollution and late-life cognitive health identified through December 31, 2020 (**also available in the manuscript, in alternate format**).

**Appendix A.** Original PubMed and EMBASE Search Criteria with Updated Search Dates

**Appendix B.** New PubMed and EMBASE Search Criteria to Improve Identification of Articles Reporting on Neuroimaging Outcomes

**Appendix C.** Information Abstracted on Each Eligible Article

**Appendix D.** Citations for Articles for Full-Text Review

**Table S1.** Associations between air pollution exposure and cognitive level in qualifying studies.

**Table S2.** Associations between air pollution exposure and cognitive change in qualifying studies.

**Table S3.** Associations between air pollution exposure and incident dementia/cognitive impairment in qualifying studies.

**Table S4.** Associations between air pollution exposure and neuroimaging outcomes in qualifying studies.

**Table S5.** Associations between traffic-related air pollution exposure and cognitive level in qualifying studies.

**Table S6.** Associations between traffic-related air pollution exposure and cognitive change in qualifying studies.

**Table S7.** Associations between traffic-related air pollution exposure and incident dementia/cognitive impairment in qualifying studies.

**Table S8.** Associations between traffic-related air pollution exposure and neuroimaging outcomes in qualifying studies.

**Figure S1.** Flowchart for identification of eligible articles for inclusion in this systematic review.

**Figure S2.** Associations between NO<sub>2</sub> exposure and cognitive level in qualifying studies.

**Figure S3.** Associations between PM<sub>2.5</sub> exposure and cognitive level in qualifying studies.

**Figure S4.** Associations between PM<sub>2.5</sub> exposure and cognitive change in qualifying studies.

**Figure S5.** Associations between PM<sub>2.5</sub> exposure and MRI volumetric outcomes in qualifying studies.

**Figure S6.** Associations between PM<sub>2.5</sub> exposure and MRI cerebrovascular outcomes in qualifying studies.

**Figure S7.** Associations between PM<sub>10</sub> exposure and cognitive level in qualifying studies.

**Table 1:** Summary of study characteristics for eligible studies on air pollution and late-life cognitive health identified through December 31, 2020

| (Citation) / Cohort                                                 | N / Location                          | Exposures Considered |                       |                   |                                            |                 |                                    |       | Outcomes Considered |                       |                                |                                 |                                      |                             |                                     |              |
|---------------------------------------------------------------------|---------------------------------------|----------------------|-----------------------|-------------------|--------------------------------------------|-----------------|------------------------------------|-------|---------------------|-----------------------|--------------------------------|---------------------------------|--------------------------------------|-----------------------------|-------------------------------------|--------------|
|                                                                     |                                       | PM <sub>10</sub>     | PM <sub>2.5-1.0</sub> | PM <sub>2.5</sub> | Traffic-related air pollution <sup>a</sup> | Wood burning PM | NO <sub>2</sub> or NO <sub>x</sub> | Ozone | API                 | Cognitive Test Scores | Prevalent Cognitive Impairment | Change in Cognitive Test Scores | Dementia (Medical Records or Claims) | Dementia (Study Assessment) | Other Incident Cognitive Impairment | Neuroimaging |
| <b>Cognitive Level</b>                                              |                                       |                      |                       |                   |                                            |                 |                                    |       |                     |                       |                                |                                 |                                      |                             |                                     |              |
| (Ailshire and Crimmins 2014) / HRS                                  | 13,996 / US                           |                      |                       | X                 |                                            |                 |                                    |       | X                   |                       |                                |                                 |                                      |                             |                                     |              |
| (Ailshire and Clarke 2015) / ACL Survey                             | 780 / US                              |                      |                       | X                 |                                            |                 |                                    |       | X                   |                       |                                |                                 |                                      |                             |                                     |              |
| (Chen et al. 2020) / TIGER                                          | 360 / Taipei and Keelung, Taiwan      | X                    | X                     | X                 |                                            |                 | X                                  |       | X                   | X                     |                                |                                 |                                      |                             |                                     | X            |
| (Chen and Schwartz 2009) / NHANES III                               | 1,764 / US                            | X                    |                       |                   |                                            |                 |                                    | X     | X                   |                       |                                |                                 |                                      |                             |                                     |              |
| (Gatto et al. 2014) / WISH, BVAIT, and ELITE                        | 1,496 / Los Angeles Basin, US         |                      |                       | X                 |                                            |                 | X                                  | X     | X                   |                       |                                |                                 |                                      |                             |                                     |              |
| (Kim et al. 2019) / Volunteer community-based sample in South Korea | 1,484 / 4 regions of South Korea      | X                    | X                     |                   |                                            |                 | X                                  |       | X                   | X                     |                                |                                 |                                      |                             |                                     | X            |
| (Lo et al. 2019) / TLSA                                             | 6,546 / Taiwan                        | X                    |                       |                   |                                            |                 |                                    | X     |                     | X                     |                                |                                 |                                      |                             |                                     | X            |
| (Power et al. 2011) / NAS                                           | 680 / Greater Boston, US              |                      |                       |                   | X                                          |                 |                                    |       | X                   | X                     |                                |                                 |                                      |                             |                                     |              |
| (Ranft et al. 2009) / SALIA                                         | 399 / Ruhr and adjacent area, Germany | X                    |                       |                   | X                                          |                 |                                    |       | X                   |                       |                                |                                 |                                      |                             |                                     |              |
| (Rocha et al. 2020) / ELSA-Brasil                                   | 3,050 / Sao Paulo, Brazil             |                      |                       |                   | X                                          |                 |                                    |       | X                   |                       |                                |                                 |                                      |                             |                                     | X            |
| (Salinas-Rodriguez et al. 2018) / ENSANUT-2012                      | 7,986 / Mexico                        |                      |                       | X                 |                                            |                 |                                    |       | X                   |                       |                                |                                 |                                      |                             |                                     | X            |
| (Schikowski et al. 2015) / SALIA                                    | 789 / Ruhr and adjacent area, Germany | X                    |                       | X                 | X                                          |                 | X                                  |       | X                   |                       |                                |                                 |                                      |                             |                                     |              |
| (Shin et al. 2019) / KFACS                                          | 2,896 / South Korea                   | X                    |                       | X                 |                                            |                 | X                                  | X     | X                   | X                     |                                |                                 |                                      |                             |                                     | X            |
| (Tallon et al. 2017) / NSHAP                                        | 3,377 / US                            |                      |                       | X                 |                                            |                 | X                                  |       | X                   |                       |                                |                                 |                                      |                             |                                     | X            |
| (Tzivian et al. 2016) / Heinz Nixdorf RECALL                        | 4,050 / Ruhr area, Germany            | X                    | X                     | X                 | X                                          |                 | X                                  |       | X                   |                       |                                |                                 |                                      |                             |                                     | X            |
| (Wellenius et al. 2012a) / MOBILIZE Boston                          | 765 / Boston, US                      |                      |                       |                   | X                                          |                 |                                    |       | X                   | X                     |                                |                                 |                                      |                             |                                     |              |
| (Wurth et al. 2018) / BPRHS                                         | 1497 / Boston, US                     |                      |                       | X                 | X                                          |                 |                                    |       | X                   |                       |                                |                                 |                                      |                             |                                     | X            |



| (Citation) / Cohort                                             | N / Location                                                                 | Exposures Considered |                      |                   |                                            |                 |                                    |       | Outcomes Considered |                       |                                |                                 |                                      |                             |                                     |              |
|-----------------------------------------------------------------|------------------------------------------------------------------------------|----------------------|----------------------|-------------------|--------------------------------------------|-----------------|------------------------------------|-------|---------------------|-----------------------|--------------------------------|---------------------------------|--------------------------------------|-----------------------------|-------------------------------------|--------------|
|                                                                 |                                                                              | PM <sub>10</sub>     | PM <sub>2.5-10</sub> | PM <sub>2.5</sub> | Traffic-related air pollution <sup>a</sup> | Wood burning PM | NO <sub>2</sub> or NO <sub>x</sub> | Ozone | API                 | Cognitive Test Scores | Prevalent Cognitive Impairment | Change in Cognitive Test Scores | Dementia (Medical Records or Claims) | Dementia (Study Assessment) | Other Incident Cognitive Impairment | Neuroimaging |
| <b>Cognitive Level and Cognitive Change</b>                     |                                                                              |                      |                      |                   |                                            |                 |                                    |       |                     |                       |                                |                                 |                                      |                             |                                     |              |
| (Cullen et al. 2018) / UK Biobank                               | 86,759 (cross-sectional analysis); 2,913 (follow-up sample) / United Kingdom | X                    | X                    | X                 |                                            |                 |                                    | X     |                     |                       |                                | X                               |                                      |                             |                                     | X            |
| (Kulick et al. 2020) / WHICAP and NOMAS                         | 5,330 (WHICAP); 1,093 (NOMAS) / northern Manhattan, New York, US             | X                    |                      | X                 | X                                          |                 |                                    | X     |                     |                       |                                | X                               |                                      |                             |                                     | X            |
| (Tonne et al. 2014) / Whitehall II                              | 2,867 / Greater London, United Kingdom                                       | X                    |                      | X                 | X                                          |                 |                                    |       |                     |                       |                                | X                               |                                      |                             |                                     |              |
| <b>Cognitive Change</b>                                         |                                                                              |                      |                      |                   |                                            |                 |                                    |       |                     |                       |                                |                                 |                                      |                             |                                     |              |
| (Cleary et al. 2018) / National AD Centers Database             | 5,116 / US                                                                   |                      |                      | X                 |                                            |                 |                                    | X     |                     |                       |                                | X                               |                                      |                             |                                     | X            |
| (Colicino et al. 2014) / NAS                                    | 387 / Greater Boston, US                                                     |                      |                      |                   | X                                          |                 |                                    |       |                     |                       |                                | X                               |                                      |                             |                                     | X            |
| (Oudin et al. 2017) / Betula                                    | 1,469 / Umeå, Sweden                                                         |                      |                      |                   |                                            |                 |                                    | X     |                     |                       |                                | X                               |                                      |                             |                                     | X            |
| (Petkus et al. 2020) / WHISCA                                   | 2,202 / US                                                                   |                      |                      | X                 |                                            |                 |                                    |       |                     |                       |                                | X                               |                                      |                             |                                     | X            |
| (Petkus et al. 2021) / WHIMS-ECHO                               | 1,583 / US                                                                   |                      |                      | X                 |                                            |                 |                                    | X     |                     |                       |                                | X                               |                                      |                             |                                     | X            |
| (Weuve et al. 2012) / NHS                                       | 19,409 / US                                                                  | X                    | X                    | X                 |                                            |                 |                                    |       |                     |                       |                                | X                               |                                      |                             |                                     |              |
| <b>Prevalent Dementia</b>                                       |                                                                              |                      |                      |                   |                                            |                 |                                    |       |                     |                       |                                |                                 |                                      |                             |                                     |              |
| (Dimakakou et al. 2020) / UK Biobank                            | 502,504 / United Kingdom                                                     |                      |                      | X                 |                                            |                 |                                    |       |                     |                       |                                |                                 | X                                    |                             |                                     | X            |
| <b>Incident Dementia or Other Incident Cognitive Impairment</b> |                                                                              |                      |                      |                   |                                            |                 |                                    |       |                     |                       |                                |                                 |                                      |                             |                                     |              |
| (Ailshire and Walsemann 2021) / HRS                             | 9,970 (year 2004); 9,185 (year 2014) / US                                    |                      |                      | X                 |                                            |                 |                                    |       |                     |                       |                                |                                 |                                      | X                           |                                     | X            |

| (Citation) / Cohort                                                      | N / Location                                    | Exposures Considered |                      |                   |                                            |                 |                                    |       | Outcomes Considered |                       |                                |                                 |                                      |                             | New to the Review |                                     |              |
|--------------------------------------------------------------------------|-------------------------------------------------|----------------------|----------------------|-------------------|--------------------------------------------|-----------------|------------------------------------|-------|---------------------|-----------------------|--------------------------------|---------------------------------|--------------------------------------|-----------------------------|-------------------|-------------------------------------|--------------|
|                                                                          |                                                 | PM <sub>10</sub>     | PM <sub>2.5-10</sub> | PM <sub>2.5</sub> | Traffic-related air pollution <sup>a</sup> | Wood burning PM | NO <sub>2</sub> or NO <sub>x</sub> | Ozone | API                 | Cognitive Test Scores | Prevalent Cognitive Impairment | Change in Cognitive Test Scores | Dementia (Medical Records or Claims) | Dementia (Study Assessment) |                   | Other Incident Cognitive Impairment | Neuroimaging |
| (Carey et al. 2018) / CPRD                                               | 130,978 / Greater London, UK                    |                      |                      | X                 | X                                          |                 | X                                  | X     |                     |                       |                                | X                               |                                      |                             |                   |                                     | X            |
| (Cerza et al. 2019)/ Rome Longitudinal Cohort                            | 350,844 / Rome, Italy                           | X                    | X                    | X                 | X                                          |                 | X                                  | X     |                     |                       |                                | X                               |                                      |                             |                   |                                     | X            |
| (Chang et al. 2014) / NHIRD Taiwan                                       | 29,547 / Taiwan                                 |                      |                      |                   |                                            |                 | X                                  |       |                     |                       |                                | X                               |                                      |                             |                   |                                     |              |
| (H Chen et al. 2017a) / Ontario Population Health and Environment Cohort | 2,066,639 / Ontario, Canada                     |                      |                      | X                 |                                            |                 | X                                  | X     |                     |                       |                                | X                               |                                      |                             |                   |                                     | X            |
| (H Chen et al. 2017b) / Ontario Population Health and Environment Cohort | 2,165,268 / Ontario, Canada                     |                      |                      |                   | X                                          |                 |                                    |       |                     |                       |                                | X                               |                                      |                             |                   |                                     | X            |
| (Grande et al. 2020) / SNAC-K                                            | 2,927 / Kungsholmen district, Stockholm, Sweden |                      |                      | X                 |                                            |                 | X                                  |       |                     |                       |                                | X                               | X                                    |                             |                   |                                     | X            |
| (He et al. 2020) / ZJMPHS                                                | 7,311 / Zhejiang province, China                | X                    |                      | X                 |                                            |                 | X                                  | X     | X                   |                       |                                |                                 |                                      |                             | X                 |                                     | X            |
| (Ilango et al. 2020) / NPHS and CCHS participants                        | 34,391 / Ontario, Canada                        |                      |                      | X                 |                                            |                 | X                                  |       |                     |                       |                                | X                               |                                      |                             |                   |                                     | X            |
| (Jung et al. 2015) / NHIRD Taiwan                                        | 95,690 / Taiwan                                 |                      |                      | X                 |                                            |                 |                                    | X     |                     |                       |                                | X                               |                                      |                             |                   |                                     |              |
| (Li et al. 2019) / NHIRD Taiwan                                          | 4,155 / Taiwan                                  | X                    |                      |                   |                                            |                 | X                                  | X     |                     |                       |                                | X                               |                                      |                             |                   |                                     | X            |
| (Loop et al. 2013) / REGARDS                                             | 20,150 / US                                     |                      |                      | X                 |                                            |                 |                                    |       |                     |                       |                                |                                 |                                      |                             | X                 |                                     |              |
| (Oudin et al. 2016) / Betula                                             | 1,806 / Umeå, Sweden                            |                      |                      |                   |                                            |                 | X                                  |       |                     |                       |                                | X                               | X                                    |                             |                   |                                     |              |
| (Oudin et al. 2018) / Betula                                             | 1,806 / Umeå, Sweden                            |                      |                      |                   | X                                          | X               |                                    |       |                     |                       |                                | X                               | X                                    |                             |                   |                                     | X            |
| (Paul et al. 2020) / SALSA                                               | 1,564 / Sacramento Valley, California, US       |                      |                      |                   | X                                          |                 |                                    |       |                     |                       |                                |                                 | X                                    | X                           |                   |                                     | X            |
| (Ran et al. 2021) / Chinese EHS                                          | 59,349 / Hong Kong, China                       |                      |                      | X                 |                                            |                 |                                    |       |                     |                       |                                | X                               |                                      |                             |                   |                                     | X            |
| (Shi et al. 2020) / Medicare fee-for-service beneficiaries               | 63,038,019 / US                                 |                      |                      | X                 |                                            |                 |                                    |       |                     |                       |                                | X                               |                                      |                             |                   |                                     | X            |

| (Citation) / Cohort                                                             | N / Location                                                                 | Exposures Considered |                      |                   |                                            |                 |                                    |       | Outcomes Considered |                       |                                |                                 |                                      |                             | New to the Review |                                     |              |
|---------------------------------------------------------------------------------|------------------------------------------------------------------------------|----------------------|----------------------|-------------------|--------------------------------------------|-----------------|------------------------------------|-------|---------------------|-----------------------|--------------------------------|---------------------------------|--------------------------------------|-----------------------------|-------------------|-------------------------------------|--------------|
|                                                                                 |                                                                              | PM <sub>10</sub>     | PM <sub>2.5-10</sub> | PM <sub>2.5</sub> | Traffic-related air pollution <sup>a</sup> | Wood burning PM | NO <sub>2</sub> or NO <sub>x</sub> | Ozone | API                 | Cognitive Test Scores | Prevalent Cognitive Impairment | Change in Cognitive Test Scores | Dementia (Medical Records or Claims) | Dementia (Study Assessment) |                   | Other Incident Cognitive Impairment | Neuroimaging |
| (Smargiassi et al. 2020) / QICDSS                                               | 1,807,133 (Quebec); 457,768 (Montreal) / Quebec/Montreal, Canada             |                      |                      | X                 | X                                          |                 | X                                  |       |                     |                       |                                | X                               |                                      |                             |                   |                                     | X            |
| (Wang et al. 2020) / CLHLS                                                      | 13,324 / China                                                               |                      |                      | X                 |                                            |                 |                                    |       |                     |                       |                                |                                 |                                      |                             | X                 |                                     | X            |
| (Wu et al. 2015) / Case-control                                                 | 871 / northern Taiwan                                                        | X                    |                      |                   |                                            |                 |                                    | X     |                     |                       |                                |                                 | X                                    |                             |                   |                                     | X            |
| (Yuchi et al. 2020) / MSP registry                                              | 633,949 (NAD analysis); 13,498 (AD analysis) / Metro Vancouver, Canada       |                      |                      | X                 | X                                          |                 | X                                  |       |                     |                       |                                | X                               |                                      |                             |                   |                                     | X            |
| Incident Dementia or Other Incident Cognitive Impairment and Neuroimaging Level |                                                                              |                      |                      |                   |                                            |                 |                                    |       |                     |                       |                                |                                 |                                      |                             |                   |                                     |              |
| (JC Chen et al. 2017) / WHIMS                                                   | 1,403 (neuroimaging); 7,447 (incident dementia or cognitive impairment) / US |                      |                      | X                 | X                                          |                 |                                    |       |                     |                       |                                |                                 | X                                    | X                           | X                 | X                                   | X            |

a) Includes measures of distance to road, traffic intensity, black carbon, traffic-sourced particulate matter, and TRAP-NO<sub>x</sub>. Though NO<sub>2</sub> and NO<sub>x</sub> are often considered as traffic-related air pollution, we consider them separately.

b) Sample size varies by analysis. N=929 represents the largest reported sample size for primary analyses.

Abbreviations: ACL, Americans' Changing Lives; ALFA, Alzheimer's and Family; AD, Alzheimer's disease; ARIC, Atherosclerosis Risk in Communities; BPRHS, Boston Puerto Rican Health Study; BVAIT, B-Vitamin Atherosclerosis Intervention Trial; CCHS, Canadian Community Health Survey; CLHLS, Chinese Longitudinal Healthy Longevity Survey; CPRD, Clinical Practice Research Datalink; EHS, Elderly Health Service; ELITE, Early Versus Late Intervention Trial; ELSA-Brasil, Brazilian Longitudinal Study on Adult Health; ENSANUT-2012, Spanish acronym for National Survey of Health and Nutrition in Mexico in 2012; FOS, Framingham Offspring Study; Heinz Nixdorf RECALL, Risk factors, Evaluation of Coronary Calcium and Lifestyle study; HRS, Health and Retirement Study; ICD-9, International Classification of Diseases, Ninth Revision; ICD-9-CM, International Classification of Diseases, Ninth Revision, Clinical Modification; IDEAS, Imaging Dementia – Evidence for Amyloid Scanning; KFACS, Korean Frailty and Aging Cohort Study; MADRC, Massachusetts Alzheimer's Disease Research Center Longitudinal Cohort; MOBILIZE, Maintenance of Balance, Independent Living, Intellect, and Zest in the Elderly; MSP, Medical Service Plan; NAS, Normative Aging Study; NAD, non-Alzheimer's dementia; NHANES III, Third National Health and Nutrition Examination Survey; NHIRD, National Health Insurance Research Database; NHS, Nurses' Health Study; NO<sub>2</sub>, nitrogen dioxides; NO<sub>x</sub>, nitrogen oxides; NOMAS, Northern Manhattan Study; NPHS, National Population Health Survey; NSHAP, National Social Health and Aging Study; PM, particulate matter; PM<sub>2.5</sub>, particulate matter with an aerodynamic diameter < 2.5 micrometers; PM<sub>10</sub>, particulate matter with an aerodynamic diameter < 10 micrometers; PM<sub>2.5-10</sub>, particulate matter with an aerodynamic diameter between 2.5 and 10 micrometers; QICDSS, Quebec Integrated Chronic Disease Surveillance System; REGARDS, Reasons for Geographic and Racial Differences in Stroke; SALIA, Study on the Influence of Air Pollution on Lung Function, Inflammation, and Aging; SALSA, Sacramento Area Latino Study on Aging; SNAC-K, Swedish National Study of Aging and Care in Kungsholmen; TIGER, Taiwan Institute for Geriatric Epidemiological Research; TLSA, Taiwanese Longitudinal Study on Aging; UK, United Kingdom; US, United States; WHICAP, Washington Heights-Inwood Community Aging Project; WHIMS-ECHO, Women's Health Initiative Memory Study of the Epidemiology of Cognitive Health Outcomes; WHIMS-MRI, Women's Health Initiative Memory Study

Magnetic Resonance Imaging Study; WHISCA, Women's Health Initiative Study of Cognitive Aging; WISH, Women's Isoflavone Soy Health; ZJMPHS, Zhejiang Major Public Health Surveillance.



**Table 2.** Summary of quality assessment for eligible studies on air pollution and late-life cognitive health identified through December 31, 2020

| Citation / Cohort                                    | Study Strengths <sup>a</sup>        |                    |                                                                  |                                                               |                  | New to the Review | Noted Study Limitations <sup>b</sup>                                                                                                                                                                                                                                                                    |
|------------------------------------------------------|-------------------------------------|--------------------|------------------------------------------------------------------|---------------------------------------------------------------|------------------|-------------------|---------------------------------------------------------------------------------------------------------------------------------------------------------------------------------------------------------------------------------------------------------------------------------------------------------|
|                                                      | Exposure Assessment and Variability | Outcome Assessment | No Substantial Issues with Confounding/ Inappropriate Adjustment | No Substantial Issues with Cohort Formation/Loss to Follow-Up | Generalizability |                   |                                                                                                                                                                                                                                                                                                         |
| <b>Cognitive Level</b>                               |                                     |                    |                                                                  |                                                               |                  |                   |                                                                                                                                                                                                                                                                                                         |
| (Ailshire and Crimmins 2014) / HRS                   |                                     | ✓                  | ✓                                                                | ✓                                                             | ✓                |                   | No individual-level exposure assessment, restricted to regions near regulatory monitors.                                                                                                                                                                                                                |
| (Ailshire and Clarke 2015) / ACL Survey              |                                     |                    |                                                                  | ✓                                                             | ✓                |                   | No individual-level exposure assessment, restricted to regions near regulatory monitors; insensitive test of cognition will likely only pick up highly impaired; crude age and education adjustment.                                                                                                    |
| (Chen et al. 2020) / TIGER                           |                                     |                    |                                                                  |                                                               | ✓                | X                 | Limited exposure variability; reporting on outcome definition is unclear; inappropriate adjustment for a potential intermediate; no information on correlates of attrition.                                                                                                                             |
| (Chen and Schwartz 2009) / NHANES III                |                                     | ✓                  |                                                                  | ✓                                                             | ✓                |                   | No individual-level exposure assessment, restricted to regions near regulatory monitors; adjusted for age in 10-year bands, different adjustment for socioeconomic status across exposures, specifically some models of PM <sub>10</sub> not adjusted for both race/ethnicity and socioeconomic status. |
| (Gatto et al. 2014) / WISH, BVAIT, and ELITE         |                                     | ✓                  | ✓                                                                |                                                               |                  |                   | Only modest capture of local exposure gradients; cohort was extremely healthy for age due to inclusion/exclusion criteria of original randomized controlled trials.                                                                                                                                     |
| (Kim et al. 2019) / Voluntary community-based sample | ✓                                   |                    |                                                                  |                                                               | ✓                | X                 | Outcome was below threshold on dementia screening test after excluding persons with dementia or mild cognitive impairment; crude age adjustment, inappropriate adjustment for intermediates, reported only stratified analysis without justification.                                                   |
| (Lo et al. 2019) / TLISA                             |                                     |                    |                                                                  |                                                               | ✓                | X                 | No individual-level exposure assessment or information on exposure distribution; insensitive test of cognition will likely only pick up highly impaired; inappropriate adjustment for IADLs; lack of information on loss to follow-up despite use of repeated measures for cross-sectional analysis.    |
| (Power et al. 2011) / NAS                            | ✓                                   | ✓                  |                                                                  | ✓                                                             | ✓                |                   | Inappropriate adjustment for intermediates.                                                                                                                                                                                                                                                             |
| (Ranft et al. 2009) / SALIA                          |                                     | ✓                  |                                                                  | ✓                                                             | ✓                |                   | Relatively little exposure variability in recent exposure for rural participants, modest capture of local exposure gradients; crude adjustment for age and socioeconomic status, inappropriate adjustment for co-morbidities.                                                                           |
| (Rocha et al. 2020) / ELSA-Brasil                    | ✓                                   | ✓                  | ✓                                                                |                                                               | ✓                | X                 | Excluded substantial proportion of sample for missing exposure data.                                                                                                                                                                                                                                    |
| (Salinas-Rodriguez et al. 2018) / ENSANUT-2012       |                                     | ✓                  | ✓                                                                | ✓                                                             | ✓                | X                 | No individual-level exposure assessment, limited capture of local air pollution exposure gradients.                                                                                                                                                                                                     |
| (Schikowski et al. 2015) / SALIA                     |                                     | ✓                  | ✓                                                                | ✓                                                             | ✓                |                   | Relatively little variation in PM across study participants.                                                                                                                                                                                                                                            |

| Citation / Cohort                             | Study Strengths <sup>a</sup>        |                    |                                                                     |                                                                  |                  | New to the Review | Noted Study Limitations <sup>b</sup>                                                                                                                                                                                                                                                                                        |
|-----------------------------------------------|-------------------------------------|--------------------|---------------------------------------------------------------------|------------------------------------------------------------------|------------------|-------------------|-----------------------------------------------------------------------------------------------------------------------------------------------------------------------------------------------------------------------------------------------------------------------------------------------------------------------------|
|                                               | Exposure Assessment and Variability | Outcome Assessment | No Substantial Issues with Confounding/<br>Inappropriate Adjustment | No Substantial Issues with Cohort<br>Formation/Loss to Follow-Up | Generalizability |                   |                                                                                                                                                                                                                                                                                                                             |
| (Shin et al. 2019) / KFACS                    |                                     | ✓                  |                                                                     | ✓                                                                | ✓                | X                 | Limited exposure variation, exposure estimation poorly documented, no individual-level exposure assessment; inappropriate adjustment for co-morbidities.                                                                                                                                                                    |
| (Tallon et al. 2017) / NSHAP                  |                                     | ✓                  | ✓                                                                   | ✓                                                                | ✓                | X                 | Excluded 1/3 of participants from analyses with NO <sub>2</sub> exposure, spatial resolution is limited, especially for NO <sub>2</sub> .                                                                                                                                                                                   |
| (Tzivian et al. 2016) / Heinz Nixdorf RECALL  |                                     | ✓                  | ✓                                                                   | ✓                                                                | ✓                | X                 | Limited exposure variability.                                                                                                                                                                                                                                                                                               |
| (Wellenius et al. 2012a) / MOBILIZE Boston    | ✓                                   | ✓                  | ✓                                                                   |                                                                  | ✓                |                   | Lack of information on loss to follow-up despite use of repeated measures for cross-sectional analysis.                                                                                                                                                                                                                     |
| (Wurth et al. 2018) / BPRHS                   |                                     | ✓                  |                                                                     |                                                                  | ✓                | X                 | Limited exposure variation, no individual-level exposure assessment; no adjustment for calendar time (necessary because a single monitor was used to assess exposure based on individual's cognitive test date); lack of information on loss to follow-up despite use of repeated measures for cross-sectional analysis.    |
| (Yao et al. 2021) / CLHLS                     |                                     | ✓                  | ✓                                                                   |                                                                  | ✓                | X                 | Use self-report for assessment of distance to road; excluded 23% due to missing MMSE data.                                                                                                                                                                                                                                  |
| (Younan et al. 2020a) / WHIMS-MRI and WHISCA  | ✓                                   | ✓                  |                                                                     | ✓                                                                |                  | X                 | Inappropriate adjustment for intermediates; MRI sample appears extremely healthy based on sample characteristics.                                                                                                                                                                                                           |
| (Zeng et al. 2010) / CLHLS                    |                                     | ✓                  | ✓                                                                   | ✓                                                                | ✓                |                   | API is a crude measure combining multiple air pollutants with variable correlation, measured at the community level.                                                                                                                                                                                                        |
| <b>Neuroimaging Level and Cognitive Level</b> |                                     |                    |                                                                     |                                                                  |                  |                   |                                                                                                                                                                                                                                                                                                                             |
| (Crous-Bou et al. 2020) / ALFA                |                                     | ✓                  | ✓                                                                   | ✓                                                                |                  | X                 | Did not report exposure contrast associated with reported effect estimate; enriched in participants who are APOE E4 positive, have a family history of dementia.                                                                                                                                                            |
| (Nußbaum et al. 2020) / 1000BRAINS            |                                     | ✓                  | ✓                                                                   | ✓                                                                | ✓                | X                 | Limited exposure variability.                                                                                                                                                                                                                                                                                               |
| <b>Neuroimaging Level</b>                     |                                     |                    |                                                                     |                                                                  |                  |                   |                                                                                                                                                                                                                                                                                                                             |
| (Casanova et al. 2016) / WHIMS-MRI            | ✓                                   | ✓                  |                                                                     |                                                                  |                  | X                 | Adjustment for intermediates in presented models; no comparison of MRI sub-cohort to full cohort; MRI sample appears extremely healthy based on sample characteristics.                                                                                                                                                     |
| (Chen et al. 2015) / WHIMS-MRI                |                                     | ✓                  | ✓                                                                   |                                                                  |                  |                   | ~11% of the cohort were missing >40% of PM <sub>2.5</sub> data for the exposure assessment period and point estimates are attenuated, but remain statistically significant when excluding this group; no comparison of MRI sub-cohort to full cohort; MRI sample appears extremely healthy based on sample characteristics. |
| (Erickson et al. 2020) / UK Biobank           | ✓                                   | ✓                  |                                                                     |                                                                  |                  | X                 | Inappropriate adjustment for intermediates or consequences of exposure or outcome; no comparison of MRI sub-cohort to full cohort; sample is much healthier than general UK population.                                                                                                                                     |

| Citation / Cohort                           | Study Strengths <sup>a</sup>        |                    |                                         |                                                               |                  | New to the Review | Noted Study Limitations <sup>b</sup>                                                                                                                                                                                                                                                                                                                                              |
|---------------------------------------------|-------------------------------------|--------------------|-----------------------------------------|---------------------------------------------------------------|------------------|-------------------|-----------------------------------------------------------------------------------------------------------------------------------------------------------------------------------------------------------------------------------------------------------------------------------------------------------------------------------------------------------------------------------|
|                                             | Exposure Assessment and Variability | Outcome Assessment | No Substantial Issues with Confounding/ | No Substantial Issues with Cohort Formation/Loss to Follow-Up | Generalizability |                   |                                                                                                                                                                                                                                                                                                                                                                                   |
| (Gale et al. 2020) / UK Biobank             | ✓                                   |                    |                                         |                                                               |                  | X                 | Unclear if volumes standardized by intracranial volume, no information on MRI processing pipeline, left/right separated without confirmation of effect modification; inappropriate adjustment for intermediates or consequences of exposure or outcome, a proxy of exposure; no comparison of MRI sub-cohort to full cohort; sample is much healthier than general UK population. |
| (Hedges et al. 2019) / UK Biobank           | ✓                                   |                    |                                         |                                                               |                  | X                 | Unclear if volumes standardized by intracranial volume, no information on MRI processing pipeline, left/right separated without confirmation of effect modification; inappropriate adjustment for intermediates or consequences of exposure or outcome, a proxy of exposure; no comparison of MRI sub-cohort to full cohort; sample is much healthier than general UK population. |
| (Hedges et al. 2020) / UK Biobank           | ✓                                   |                    |                                         |                                                               |                  | X                 | Unclear if volumes standardized by intracranial volume, no information on MRI processing pipeline, left/right separated without confirmation of effect modification; inappropriate adjustment for intermediates or consequences of exposure or outcome, a proxy of exposure; no comparison of MRI sub-cohort to full cohort; sample is much healthier than general UK population. |
| (Iaccarino et al. 2021) / IDEAS             |                                     | ✓                  |                                         |                                                               |                  | X                 | No individual-level exposure assessment; inappropriate adjustment for intermediates; selection based on cognitive status could cause collider bias; highly selected clinical sample of people with uncertain cognitive impairment etiology who access tertiary care.                                                                                                              |
| (Kulick et al. 2017) / NOMAS                | ✓                                   | ✓                  | ✓                                       |                                                               | ✓                | X                 | No comparison of MRI sub-cohort to full cohort.                                                                                                                                                                                                                                                                                                                                   |
| (Power et al. 2018a) / ARIC                 |                                     | ✓                  | ✓                                       |                                                               | ✓                | X                 | Limited exposure variation for site-specific analyses, selection based on cognitive status could cause collider bias.                                                                                                                                                                                                                                                             |
| (Wilker et al. 2015) / FOS                  | ✓                                   | ✓                  | ✓                                       |                                                               | ✓                |                   | No comparison of MRI sub-cohort to full cohort.                                                                                                                                                                                                                                                                                                                                   |
| (Wilker et al. 2016a) / MADRC               | ✓                                   | ✓                  | ✓                                       |                                                               |                  | X                 | Highly selected clinical sample.                                                                                                                                                                                                                                                                                                                                                  |
| (Younan et al. 2020b) / WHIMS-MRI           | ✓                                   | ✓                  | ✓                                       | ✓                                                             |                  | X                 | MRI sample appears extremely healthy based on sample characteristics.                                                                                                                                                                                                                                                                                                             |
| <b>Cognitive Level and Cognitive Change</b> |                                     |                    |                                         |                                                               |                  |                   |                                                                                                                                                                                                                                                                                                                                                                                   |
| (Cullen et al. 2018) / UK Biobank           | ✓                                   |                    | ✓                                       |                                                               |                  | X                 | Time period elapsed and limited number of assessments may limit ability to detect change given age of sample; not representative of sampling frame and low participation rate; sample is much healthier than general UK population.                                                                                                                                               |
| (Kulick et al. 2020) / WHICAP and NOMAS     |                                     | ✓                  | ✓                                       |                                                               | ✓                | X                 | Low exposure variability within NOMAS participants; no comparison of MRI sub-cohort to full cohort.                                                                                                                                                                                                                                                                               |

| Citation / Cohort                                               | Study Strengths <sup>a</sup>        |                    |                                         |                                                               |                  | New to the Review | Noted Study Limitations <sup>b</sup>                                                                                                                                                                                                                                                                                                                                                                                    |
|-----------------------------------------------------------------|-------------------------------------|--------------------|-----------------------------------------|---------------------------------------------------------------|------------------|-------------------|-------------------------------------------------------------------------------------------------------------------------------------------------------------------------------------------------------------------------------------------------------------------------------------------------------------------------------------------------------------------------------------------------------------------------|
|                                                                 | Exposure Assessment and Variability | Outcome Assessment | No Substantial Issues with Confounding/ | No Substantial Issues with Cohort Formation/Loss to Follow-Up | Generalizability |                   |                                                                                                                                                                                                                                                                                                                                                                                                                         |
| (Tonne et al. 2014) / Whitehall II                              |                                     | ✓                  |                                         | ✓                                                             | ✓                |                   | Relatively little variation in total PM <sub>10</sub> and total PM <sub>2.5</sub> across study participants, no individual-level exposure assessment; did not report whether they adjusted for time-by-covariate interactions in analyses of cognitive change.                                                                                                                                                          |
| <b>Cognitive Change</b>                                         |                                     |                    |                                         |                                                               |                  |                   |                                                                                                                                                                                                                                                                                                                                                                                                                         |
| (Cleary et al. 2018) / National AD Centers Database             |                                     | ✓                  |                                         |                                                               |                  | X                 | No individual-level exposure, low spatial resolution of model, use of tertiles for exposure; did not specify if including cross-product terms to adjust for confounding of decline; highly selected clinical sample and required development of cognitive impairment during follow-up; enriched in participants who are APOE E4 positive, have a family history of dementia, or have rare dementias.                    |
| (Colicino et al. 2014) / NAS                                    | ✓                                   | ✓                  |                                         |                                                               | ✓                | X                 | Inappropriate adjustment for potential intermediates; no discussion of extent or correlates of attrition during follow-up.                                                                                                                                                                                                                                                                                              |
| (Oudin et al. 2017) / Betula                                    |                                     | ✓                  | ✓                                       | ✓                                                             | ✓                | X                 | Exposures were predicted for 2009-2010, but outcome follow-up spanned 1993-2010.                                                                                                                                                                                                                                                                                                                                        |
| (Petkus et al. 2020) / WHISCA                                   | ✓                                   | ✓                  |                                         |                                                               | ✓                | X                 | Inappropriate adjustment for intermediates; no discussion of extent or correlates of attrition during follow-up.                                                                                                                                                                                                                                                                                                        |
| (Petkus et al. 2021) / WHIMS-ECHO                               | ✓                                   | ✓                  |                                         |                                                               | ✓                | X                 | Inappropriate adjustment for intermediates; recruitment required survival to age 80, no discussion of extent or correlates of attrition during follow-up.                                                                                                                                                                                                                                                               |
| (Weuve et al. 2012) / NHS                                       | ✓                                   | ✓                  | ✓                                       |                                                               | ✓                |                   | No discussion of correlates of attrition during follow-up.                                                                                                                                                                                                                                                                                                                                                              |
| <b>Prevalent Dementia</b>                                       |                                     |                    |                                         |                                                               |                  |                   |                                                                                                                                                                                                                                                                                                                                                                                                                         |
| (Dimakakou et al. 2020) / UK Biobank                            |                                     |                    |                                         |                                                               |                  | X                 | No information on exposure distribution, no information on how exposure was linked to participants; reliance on medical records; inappropriate adjustment for potential consequences of disease, no adjustment for individual-level SES; sample is much healthier than general UK population, inclusion of young participants not at risk of dementia; not representative of sampling frame and low participation rate. |
| <b>Incident Dementia or Other Incident Cognitive Impairment</b> |                                     |                    |                                         |                                                               |                  |                   |                                                                                                                                                                                                                                                                                                                                                                                                                         |
| (Ailshire and Walsemann 2021) / HRS                             |                                     | ✓                  | ✓                                       |                                                               | ✓                | X                 | No individual-level exposure assessment; no information on proportion of persons lost to follow-up or correlates of attrition                                                                                                                                                                                                                                                                                           |
| (Carey et al. 2018) / CPRD                                      |                                     |                    |                                         |                                                               | ✓                | X                 | Limited exposure variation, no individual-level exposure assessment; reliance on medical records/claims data; no adjustment for individual-level education; no discussion of extent or correlates of attrition during follow-up.                                                                                                                                                                                        |
| (Cerza et al. 2019) / Rome Longitudinal Cohort                  |                                     |                    | ✓                                       | ✓                                                             | ✓                | X                 | Exposures were predicted for 2009-2010, but outcome follow-up started in 2001; reliance on hospital admissions for identifying dementia.                                                                                                                                                                                                                                                                                |

| Citation / Cohort                                                        | Study Strengths <sup>a</sup>        |                    |                                         |                                                               |                  | New to the Review | Noted Study Limitations <sup>b</sup>                                                                                                                                                                                                                                                                                                                                                                                                                                                                                                                                         |
|--------------------------------------------------------------------------|-------------------------------------|--------------------|-----------------------------------------|---------------------------------------------------------------|------------------|-------------------|------------------------------------------------------------------------------------------------------------------------------------------------------------------------------------------------------------------------------------------------------------------------------------------------------------------------------------------------------------------------------------------------------------------------------------------------------------------------------------------------------------------------------------------------------------------------------|
|                                                                          | Exposure Assessment and Variability | Outcome Assessment | No Substantial Issues with Confounding/ | No Substantial Issues with Cohort Formation/Loss to Follow-Up | Generalizability |                   |                                                                                                                                                                                                                                                                                                                                                                                                                                                                                                                                                                              |
| (Chang et al. 2014) / NHIRD Taiwan                                       |                                     |                    |                                         |                                                               |                  |                   | No individual-level exposure estimates, exposure averaging period depended on date of censoring; use of ICD-9-CM codes for identification of dementia, youngest participants not at risk of dementia given <65 years of age for duration of follow-up; no adjustment for education, inappropriate adjustment for multiple potential mediating health conditions in all presented models; no information on attrition or its correlates; inclusion criteria required respiratory tract infection, which may have resulted in selection of sicker or more susceptible persons. |
| (H Chen et al. 2017a) / Ontario Population Health and Environment Cohort |                                     |                    |                                         |                                                               | ✓                | X                 | No individual-level exposure assessment, poor resolution for ozone; reliance on medical records/claims data; crude adjustment for SES; no discussion of extent or correlates of attrition during follow-up.                                                                                                                                                                                                                                                                                                                                                                  |
| (H Chen et al. 2017b) / Ontario Population Health and Environment Cohort |                                     |                    |                                         |                                                               | ✓                | X                 | Proximity to major roadways based on postcode centroid; reliance on medical records/claims data; crude adjustment for SES, adjustment for mediators in primary analyses; no discussion of extent or correlates of attrition during follow-up.                                                                                                                                                                                                                                                                                                                                |
| (Grande et al. 2020) / SNAC-K                                            |                                     |                    |                                         | ✓                                                             | ✓                | X                 | Limited exposure variability; partial reliance on medical records for identification of dementia without information on frequency of identification through this method; inappropriate adjustment for intermediates.                                                                                                                                                                                                                                                                                                                                                         |
| (He et al. 2020) / ZJMPHS                                                |                                     | ✓                  | ✓                                       | ✓                                                             | ✓                | X                 | No individual-level exposure assessment, spatial resolution is limited.                                                                                                                                                                                                                                                                                                                                                                                                                                                                                                      |
| (Ilango et al. 2020) / NPHS and CCHS participants                        |                                     |                    | ✓                                       |                                                               | ✓                | X                 | Lacking information on how air pollution linked to participant location; reliance on medical records/claims data; no discussion of extent or correlates of attrition during follow-up.                                                                                                                                                                                                                                                                                                                                                                                       |
| (Jung et al. 2015) / NHIRD Taiwan                                        |                                     |                    |                                         |                                                               | ✓                |                   | No individual-level exposure estimates; use of ICD-9-CM codes for identification of dementia; no adjustment for education or socioeconomic status; no information on attrition or its correlates.                                                                                                                                                                                                                                                                                                                                                                            |
| (Li et al. 2019) / NHIRD Taiwan                                          |                                     |                    |                                         |                                                               | ✓                | X                 | No individual-level exposure assessment; use of ICD-9-CM codes for identification of dementia; crude adjustment for SES; case-control design assumes no informative attrition.                                                                                                                                                                                                                                                                                                                                                                                               |
| (Loop et al. 2013) / REGARDS                                             |                                     | ✓                  | ✓                                       |                                                               | ✓                |                   | No individual level exposure estimates; no information on correlates of attrition and requirement of completion of 2 cognitive assessments for inclusion in analysis.                                                                                                                                                                                                                                                                                                                                                                                                        |
| (Oudin et al. 2016) / Betula                                             |                                     |                    | ✓                                       | ✓                                                             | ✓                |                   | Exposures were predicted for 2009-2010, but outcome follow-up spanned 1993-2010, results using back-extrapolated exposure predictions were reported to be similar, but data not shown; partial reliance on medical records for identification of dementia.                                                                                                                                                                                                                                                                                                                   |

| Citation / Cohort                                                                      | Study Strengths <sup>a</sup>        |                    |                                         |                                                               |                  | New to the Review | Noted Study Limitations <sup>b</sup>                                                                                                                                                                                                  |
|----------------------------------------------------------------------------------------|-------------------------------------|--------------------|-----------------------------------------|---------------------------------------------------------------|------------------|-------------------|---------------------------------------------------------------------------------------------------------------------------------------------------------------------------------------------------------------------------------------|
|                                                                                        | Exposure Assessment and Variability | Outcome Assessment | No Substantial Issues with Confounding/ | No Substantial Issues with Cohort Formation/Loss to Follow-Up | Generalizability |                   |                                                                                                                                                                                                                                       |
| (Oudin et al. 2018) / Betula                                                           | ✓                                   |                    | ✓                                       |                                                               | ✓                | X                 | Partial reliance on medical records for identification of dementia; did not address loss to follow-up as a potential source of bias.                                                                                                  |
| (Paul et al. 2020) / SALSA                                                             | ✓                                   | ✓                  | ✓                                       | ✓                                                             | ✓                | X                 | Nothing of note.                                                                                                                                                                                                                      |
| (Ran et al. 2021) / Chinese EHS                                                        |                                     |                    | ✓                                       |                                                               |                  | X                 | Limited exposure variability; reliance on medical records; no information on correlates of attrition; fee charged for participant enrollment.                                                                                         |
| (Shi et al. 2020) / Medicare fee-for-service beneficiaries                             |                                     |                    |                                         | ✓                                                             | ✓                | X                 | No individual-level exposure assessment; reliance on claims data; crude adjustment for SES                                                                                                                                            |
| (Smargiassi et al. 2020) / QICDSS                                                      |                                     |                    |                                         |                                                               | ✓                | X                 | No individual-level exposure assessment, distance to road based on postcode centroid; reliance on medical records/claims data; no adjustment for individual-level SES; no information on correlates of attrition.                     |
| (Wang et al. 2020) / CLHLS                                                             | ✓                                   |                    |                                         |                                                               | ✓                | X                 | No information on timing of follow-up assessment; inappropriate adjustment for intermediates; no discussion of selective survival to enrollment or correlates of attrition despite large loss to follow-up.                           |
| (Wu et al. 2015) / Case-control                                                        |                                     | ✓                  |                                         |                                                               | ✓                | X                 | Inadequate documentation of exposure model validation, used tertiles of exposure; large differences in age across cases and controls may result in positivity violations; unclear whether case-control selection related to exposure. |
| (Yuchi et al. 2020) / MSP registry                                                     |                                     |                    |                                         |                                                               | ✓                | X                 | No individual-level exposure assessment; reliance on medical records/claims data; crude adjustment for SES, inappropriate adjustment for potential mediators; no information on attrition or its correlates.                          |
| <b>Incident Dementia or Other Incident Cognitive Impairment and Neuroimaging Level</b> |                                     |                    |                                         |                                                               |                  |                   |                                                                                                                                                                                                                                       |
| (JC Chen et al. 2017) / WHIMS                                                          |                                     | ✓                  | ✓                                       |                                                               |                  | X                 | No individual-level exposure assessment for diesel; no comparison of MRI subcohort to full cohort, no discussion of extent of or correlates of attrition; MRI appears extremely healthy based on sample characteristics.              |

<sup>a</sup> Studies that received a checkmark for the study strength category were not found to have any substantial limitations in those categories. Substantial limitations in categories without a checkmark are explained in the rightmost column.

<sup>b</sup>Study bias assessment pertains only to exposure-outcome associations that were unique to the sample population.

Abbreviations: ACL, Americans' Changing Lives; ALFA, Alzheimer's and Family; AD, Alzheimer's disease; ARIC, Atherosclerosis Risk in Communities; BPRHS, Boston Puerto Rican Health Study; BVAIT, B-Vitamin Atherosclerosis Intervention Trial; CCHS, Canadian Community Health Survey; CLHLS, Chinese Longitudinal Healthy Longevity Survey; CPRD, Clinical Practice Research Datalink; EHS, Elderly Health Service; ELITE, Early Versus Late Intervention Trial; ELSA-Brasil, Brazilian Longitudinal Study on Adult Health; ENSANUT-2012, Spanish acronym for National Survey of Health and Nutrition in Mexico in 2012; FOS, Framingham Offspring Study; Heinz Nixdorf RECALL, Risk factors, Evaluation of Coronary Calcium and Lifestyle study; HRS, Health and Retirement Study; IADL, instrumental activities of daily living; ICD-9, International Classification of Diseases, Ninth Revision; ICD-9-CM, International Classification of Diseases, Ninth Revision, Clinical Modification; IDEAS, Imaging Dementia – Evidence for Amyloid Scanning; KFACS, Korean Frailty and Aging Cohort Study; MADRC, Massachusetts Alzheimer's Disease Research Center Longitudinal Cohort; MOBILIZE, Maintenance of Balance, Independent Living, Intellect, and Zest in the Elderly; MSP, Medical Service Plan; NAS, Normative Aging Study; NAD, non-Alzheimer's dementia; NHANES III, Third National Health and Nutrition Examination Survey; NHIRD, National Health Insurance Research Database; NHS, Nurses' Health Study; NO<sub>2</sub>, nitrogen dioxides; NO<sub>x</sub>, nitrogen oxides;

NOMAS, Northern Manhattan Study; NPHS, National Population Health Survey; NSHAP, National Social Health and Aging Study; PM, particulate matter; PM2.5, particulate matter with an aerodynamic diameter < 2.5 micrometers; PM10, particulate matter with an aerodynamic diameter < 10 micrometers; PM2.5-10, particulate matter with an aerodynamic diameter between 2.5 and 10 micrometers; QICDSS, Quebec Integrated Chronic Disease Surveillance System; REGARDS, Reasons for Geographic and Racial Differences in Stroke; SALIA, Study on the Influence of Air Pollution on Lung Function, Inflammation, and Aging; SALSA, Sacramento Area Latino Study on Aging; SES, socioeconomic status; SNAC-K, Swedish National Study of Aging and Care in Kungsholmen; TIGER, Taiwan Institute for Geriatric Epidemiological Research; TLSA, Taiwanese Longitudinal Study on Aging; WHICAP, Washington Heights-Inwood Community Aging Project; WHIMS-ECHO, Women's Health Initiative Memory Study of the Epidemiology of Cognitive Health Outcomes; WHIMS-MRI, Women's Health Initiative Memory Study Magnetic Resonance Imaging Study; WHISCA, Women's Health Initiative Study of Cognitive Aging; WISH, Women's Isoflavone Soy Health; ZJMPHS, Zhejiang Major Public Health Surveillance

## Appendix A. Original PubMed and EMBASE Search Criteria with Updated Search Dates

|                            | PUBMED                                                                                                                                                                                                                                                                                                                                                                                                                                                                                                                              | EMBASE                                                                                                                                                                                                                                                                                                                                                                                                                                                                                                        |
|----------------------------|-------------------------------------------------------------------------------------------------------------------------------------------------------------------------------------------------------------------------------------------------------------------------------------------------------------------------------------------------------------------------------------------------------------------------------------------------------------------------------------------------------------------------------------|---------------------------------------------------------------------------------------------------------------------------------------------------------------------------------------------------------------------------------------------------------------------------------------------------------------------------------------------------------------------------------------------------------------------------------------------------------------------------------------------------------------|
| <i>Search Strategy</i>     | <b>#1 AND #2 AND #3 AND #4 AND #5<br/>NOT #6</b>                                                                                                                                                                                                                                                                                                                                                                                                                                                                                    | <b>#1 AND #2 AND #3 AND #4 AND #5<br/>NOT #6</b>                                                                                                                                                                                                                                                                                                                                                                                                                                                              |
| <i>#1<br/>Disease</i>      | <p>“dementia”[mesh:noexp] OR<br/> “alzheimer Disease”[mesh] OR<br/> (“dementia”[tw] OR “alzheimer”[tw]<br/> OR “alzheimers”[tw] OR<br/> “alzheimer's”[tw]) OR “Mild<br/> Cognitive Impairment”[Mesh] OR<br/> “cognitive decline” OR<br/> “neuropsycholog*” OR cognit* OR<br/> “cognitive change” OR “cognitive<br/> aging” OR “cognitive impairment”<br/> OR “neurobehavioral”</p>                                                                                                                                                  | <p>('dementia'/de OR 'alzheimer<br/> disease'/de OR<br/> 'frontotemporal dementia'/de OR<br/> 'multiinfarct dementia'/de OR<br/> 'presenile dementia'/de OR 'senile<br/> dementia'/de OR dementia OR<br/> alzheimer* OR 'mild cognitive<br/> impairment'/ exp OR 'mci':ab,ti OR<br/> 'cognitive decline':ab,ti OR<br/> neuropsycholog*:ab,ti OR<br/> cognit*:ab,ti OR 'cognitive<br/> change':ab,ti OR 'cognitive<br/> aging':ab,ti OR 'cognitive<br/> impairment':ab,ti OR<br/> 'neurobehavioral':ab,ti)</p> |
| <i>#2<br/>Outcome</i>      | <p>“risk”[mesh] OR “incidence”[mesh]<br/> OR (“risk”[tw] OR<br/> “incident”[tw] OR “incidence”[tw]<br/> OR “onset”[tw] OR “prevent”[tw] OR<br/> “prevents”[tw] OR “prevented”[tw]<br/> OR “cause”[tw] OR “causes”[tw] OR<br/> “caused”[tw] OR “effect”[TW] OR<br/> “associated”[TW] OR<br/> “association”[TW] OR “protect”[TW]<br/> OR “protects”[TW] OR<br/> “protected”[TW] OR<br/> “protective”[TW] OR “harm”[TW]<br/> OR “harms”[TW] OR “harmful”[TW]<br/> OR “develop”[TW] OR<br/> “develops”[TW] OR<br/> “developed”[TW])</p> | <p>('risk' OR 'risk factor' OR 'population<br/> risk' OR 'attributable risk')/de OR<br/> (risk OR inciden* OR onset OR<br/> prevent* OR associat*):ti,ab</p>                                                                                                                                                                                                                                                                                                                                                  |
| <i>#3<br/>Study Design</i> | <p>“intervention studies”[mesh:noexp]<br/> OR “clinical trials as<br/> topic”[mesh] OR “cohort<br/> studies”[mesh:noexp] OR<br/> “longitudinal studies”[mesh] OR<br/> “case-control<br/> studies”[mesh:noexp] OR “Health</p>                                                                                                                                                                                                                                                                                                        | <p>clinical trial'/exp OR ('intervention<br/> study' OR 'cohort<br/> analysis' OR 'longitudinal study' OR<br/> 'prospective study' OR 'evaluation<br/> and follow up' OR 'follow up' OR<br/> 'case control study' OR 'population<br/> based case control study' OR</p>                                                                                                                                                                                                                                        |



|                        |                                                                                                                                                                                                                                                                                                                                                                                                                                                                                                                                                                                                                                                         |                                                                                                                                                                                                                                                                                                                                                                                                                                                                                                                                                                                                                                           |
|------------------------|---------------------------------------------------------------------------------------------------------------------------------------------------------------------------------------------------------------------------------------------------------------------------------------------------------------------------------------------------------------------------------------------------------------------------------------------------------------------------------------------------------------------------------------------------------------------------------------------------------------------------------------------------------|-------------------------------------------------------------------------------------------------------------------------------------------------------------------------------------------------------------------------------------------------------------------------------------------------------------------------------------------------------------------------------------------------------------------------------------------------------------------------------------------------------------------------------------------------------------------------------------------------------------------------------------------|
|                        | <p>Surveys"[Mesh:noexp]<br/>OR ("longitudinal"[tw] OR<br/>"longitudinally"[tw] OR<br/>"prospective"[tw] OR<br/>"prospectively"[tw] OR "follow"[tw]<br/>OR "followed"[tw] OR "follow-<br/>up"[tw] OR "follow up"[tw]<br/>OR "cohort"[tw] OR "later"[tw] OR<br/>"case control"[tw] OR<br/>"case-control"[tw] OR "clinical<br/>trial"[tw] OR "controlled<br/>trial"[tw] OR "intervention<br/>study"[tw] or "intervention<br/>studies"[tw] or "cross-sectional"[tw]<br/>OR "regression"[tw]<br/>OR "association"[tw])</p>                                                                                                                                   | <p>'controlled study' OR 'major clinical<br/>study')/de OR<br/>(longitudinal* OR prospective* OR<br/>follow* OR associate*<br/>OR follow-up OR 'follow up' OR<br/>cohort OR later OR 'case<br/>control' OR 'case-control' OR 'clinical<br/>trial' OR 'controlled<br/>trial' OR 'intervention study' OR<br/>'intervention studies' OR<br/>'cross-sectional' OR<br/>'regression'):ti,ab</p>                                                                                                                                                                                                                                                 |
| <p>#4<br/>Exposure</p> | <p>"Air Pollution"[Mesh] OR<br/>"Particulate Matter"[Mesh] OR<br/>"Nitrogen Dioxide"[Mesh] OR<br/>"Ozone"[Mesh] OR "Volatile<br/>Organic Compounds"[Mesh] OR<br/>"Sulfur Dioxide"[Mesh] OR "Carbon<br/>Monoxide"[Mesh] OR "Vehicle<br/>Emissions"[Mesh] OR "distance to<br/>road"[tw] OR "PM10" [tw] OR<br/>"PM2.5" [tw] OR "traffic-related air<br/>pollution" [tw] OR "air pollution"<br/>[tw] OR "particulate matter" [tw] OR<br/>"ozone"[tw] OR "nitrogen<br/>dioxide"[tw] OR "particulates" [tw]<br/>OR "black carbon" [tw] OR "traffic<br/>pollution" [tw] OR "residential<br/>distance to nearest major"[tw] OR<br/>"traffic-related PM"[tw]</p> | <p>air pollution'/de OR 'air<br/>pollutant'/de OR 'particulate<br/>matter'/exp OR 'nitrogen<br/>dioxide'/exp OR 'ozone'/exp OR<br/>'volatile organic compound'/exp OR<br/>'sulfur dioxide'/exp OR 'exhaust<br/>gas'/exp OR 'distance to road':ab,ti<br/>OR 'pm100:ab, ti OR 'pm2.50:ab,ti<br/>OR 'traffic-related air pollution':ab,ti<br/>OR 'air pollution':ab,ti OR<br/>'particulate matter':ab,ti OR 'ozone':<br/>ab,ti OR 'nitrogen dioxide':ab,ti OR<br/>'particulates':ab,ti OR 'black<br/>carbon':ab,ti OR 'traffic<br/>pollution':ab,ti OR 'residential<br/>distance to nearest major':ab,ti OR<br/>trafficrelated pm':ab,ti</p> |
| <p>#5<br/>Date</p>     | <p>Search 1: Entrez date - 2015/08/11<br/>to 2019/06/19</p> <p>Search 2: Entrez date – 2019/06/20<br/>to 2020/07/31</p> <p>Search 3: Entrez date – 2020/08/01<br/>to 2020/12/31</p>                                                                                                                                                                                                                                                                                                                                                                                                                                                                     | <p>Search 1: 2015/08/11 to<br/>2019/06/19</p> <p>Search 2: 2019/06/20 to<br/>2020/07/31</p> <p>Search 3: 2020/08/01 to 2020/12/31</p>                                                                                                                                                                                                                                                                                                                                                                                                                                                                                                     |

#6  
*Exclude/Irrelevant (NOT)*

"mice"[ti] OR "mouse"[ti] OR  
"rat"[ti] OR "rats"[ti] OR  
"cells"[ti] OR "plasticity"[ti] OR  
"synaptic"[ti] OR  
"signaling"[ti] OR "children"[ti] OR  
"children's"[ti] OR  
"infant"[ti] OR "infants"[ti] OR  
"pediatric"[ti] OR  
"adolescent"[ti] OR "in vivo"[ti] OR  
"in vitro"[ti] OR  
"smoking"[ti] OR "smoker"[ti] OR  
"second hand smoke"[ti] OR  
"second-hand smoke"[ti] OR  
"smokers"[ti] OR "environmental  
tobacco"[ti] OR "cigarette"[ti] OR  
"tobacco"[ti] OR "secondhand"[ti]  
OR "childhood"[ti] OR  
"adolescents"[ti] OR  
"adolescence"[ti] OR "child"[ti] OR  
"preschool"[ti] OR "prenatal"

('mice' OR 'mouse' OR 'rat' OR 'rats'  
OR 'cells' OR 'plasticity' OR 'synaptic'  
OR 'signaling' OR 'children' OR  
'infant' OR 'infants' OR 'pediatric'  
OR 'adolescent' OR 'in vivo' OR 'in  
vitro' OR 'smoking' OR 'smoker' OR  
'second hand smoke' OR 'second-  
hand smoke' OR 'smokers' OR  
'environmental tobacco' OR  
'cigarette' OR 'tobacco' OR  
'secondhand' OR 'childhood' OR  
'adolescents' OR 'adolescence' OR  
'child' OR 'preschool' OR  
'prenatal'):ti

Note that changes to indexing can alter search results.

Our PubMed searches were conducted on June 20, 2019 when using Entrez date of 2015/08/11 to 2019/06/19; on August 13, 2020 when using Entrez date of 2019/06/20 to 2020/07/31; and on May 27, 2021 when using Entrez date of 2020/08/01 to 2020/12/31.

Our EMBASE searches were conducted on June 27, 2019 for #5 Date criterion of 2015/08/11 to 2019/06/19; on August 13, 2020 when using #5 Date criterion of 2019/06/20 to 2020/07/31; and on May 27, 2021 when using #5 Date criterion of 2020/08/01 to 2020/12/31.

**Appendix B. New PubMed and EMBASE Search Criteria to Improve Identification of Articles Reporting on Neuroimaging Outcomes**

|                         | PUBMED                                                                                                                                                                                                                                                                                                                                                                                                                                                                                                                                                                                                                                                                                                                                                                | EMBASE                                                                                                                                                                                                                                                                                                                                                                                                       |
|-------------------------|-----------------------------------------------------------------------------------------------------------------------------------------------------------------------------------------------------------------------------------------------------------------------------------------------------------------------------------------------------------------------------------------------------------------------------------------------------------------------------------------------------------------------------------------------------------------------------------------------------------------------------------------------------------------------------------------------------------------------------------------------------------------------|--------------------------------------------------------------------------------------------------------------------------------------------------------------------------------------------------------------------------------------------------------------------------------------------------------------------------------------------------------------------------------------------------------------|
| <i>Search Strategy</i>  | <b>(#1 AND #2) AND #3 AND #4 AND #5 AND #6 NOT #7</b>                                                                                                                                                                                                                                                                                                                                                                                                                                                                                                                                                                                                                                                                                                                 | <b>(#1 AND #2) AND #3 AND #4 AND #5 AND #6 NOT #7</b>                                                                                                                                                                                                                                                                                                                                                        |
| <i>#1<br/>MRI Terms</i> | "magnetic resonance imaging"[MeSH Terms] OR ("magnetic"[All Fields] AND "resonance"[All Fields] AND "imaging"[All Fields]) OR "magnetic resonance imaging"[tw] OR ("MRI"[All Fields]) OR ("MRI"[tw]) OR (white matter hyperintensities[All Fields] OR white matter hyperintensity[All Fields]) OR (brain volume[All Fields] OR brain volumes[All Fields]) OR (infarcts[Title/Abstract] AND brain[Title/Abstract]) OR (sulci[All Fields] AND width[All Fields]) OR ("cerebral cortex"[MeSH Terms] OR ("cerebral"[All Fields] AND "cortex"[All Fields]) OR "cerebral cortex"[All Fields] OR "cortical"[All Fields] AND thickness[All Fields])) OR (cortical volume[All Fields] OR cortical volumes[All Fields])) OR (microbleed[All Fields] OR microbleeds[All Fields]) | ('magnetic resonance imaging'/de OR ('magnetic':ab,ti AND 'resonance':ab,ti AND 'imaging':ab,ti) OR 'magnetic resonance imaging':ab,ti OR 'mri':ab,ti OR 'mri'/de OR 'white matter hyperintensities':ab,ti OR 'white matter hyperintensity':ab,ti OR 'brain volumes':ab,ti OR 'brain volume':ab,ti OR 'infarct':ab,ti OR 'sulci':ab,ti OR 'cerebral cortex':ab,ti OR 'cortical':ab,ti OR 'microbleed':ab,ti) |
| <i>#2<br/>Disease</i>   | "dementia"[mesh:noexp] OR "alzheimer Disease"[mesh] OR ("dementia"[tw] OR "alzheimer"[tw] OR alzheimers"[tw] OR "alzheimer's"[tw]) OR "Mild Cognitive Impairment"[Mesh] OR "cognitive decline" OR "neuropsycholog*" OR cognit* OR "cognitive change" OR "cognitive aging" OR "cognitive impairment" OR "neurobehavioral"                                                                                                                                                                                                                                                                                                                                                                                                                                              | ('dementia'/de OR 'alzheimer disease'/de OR 'frontotemporal dementia'/de OR 'multiinfarct dementia'/de OR 'presenile dementia'/de OR 'senile dementia'/de OR dementia OR alzheimer* OR 'mild cognitive impairment'/ exp OR 'mci':ab,ti OR 'cognitive decline':ab,ti OR neuropsycholog*:ab,ti OR cognit*:ab,ti OR 'cognitive change':ab,ti OR 'cognitive                                                      |

|                           |                                                                                                                                                                                                                                                                                                                                                                                                                                                                                                                                                                                                                                           |                                                                                                                                                                                                                                                                                                                                                                                                                                                                                                                                                                          |
|---------------------------|-------------------------------------------------------------------------------------------------------------------------------------------------------------------------------------------------------------------------------------------------------------------------------------------------------------------------------------------------------------------------------------------------------------------------------------------------------------------------------------------------------------------------------------------------------------------------------------------------------------------------------------------|--------------------------------------------------------------------------------------------------------------------------------------------------------------------------------------------------------------------------------------------------------------------------------------------------------------------------------------------------------------------------------------------------------------------------------------------------------------------------------------------------------------------------------------------------------------------------|
|                           |                                                                                                                                                                                                                                                                                                                                                                                                                                                                                                                                                                                                                                           | aging':ab,ti OR 'cognitive impairment':ab,ti OR 'neurobehavioral':ab,ti)                                                                                                                                                                                                                                                                                                                                                                                                                                                                                                 |
|                           | "risk"[mesh] OR "incidence"[mesh] OR ("risk"[tw] OR "incident"[tw] OR "incidence"[tw] OR "onset"[tw] OR "prevent"[tw] OR "prevents"[tw] OR "prevented"[tw] OR "cause"[tw] OR "causes"[tw] OR "caused"[tw] OR "effect"[TW] OR "associated"[TW] OR "association"[TW] OR "protect"[TW] OR "protects"[TW] OR "protected"[TW] OR "protective"[TW] OR "harm"[TW] OR "harms"[TW] OR "harmful"[TW] OR "develop"[TW] OR "develops"[TW] OR "developed"[TW])                                                                                                                                                                                         | ('risk' OR 'risk factor' OR 'population risk' OR 'attributable risk')/de OR (risk OR inciden* OR onset OR prevent* OR associat*):ti,ab                                                                                                                                                                                                                                                                                                                                                                                                                                   |
| #3<br><i>Outcome</i>      | "intervention studies"[mesh:noexp] OR "clinical trials as topic"[mesh] OR "cohort studies"[mesh:noexp] OR "longitudinal studies"[mesh] OR "case-control studies"[mesh:noexp] OR "Health Surveys"[Mesh:noexp] OR ("longitudinal"[tw] OR "longitudinally"[tw] OR "prospective"[tw] OR "prospectively"[tw] OR "follow"[tw] OR "followed"[tw] OR "follow-up"[tw] OR "follow up"[tw] OR "cohort"[tw] OR "later"[tw] OR "case control"[tw] OR "case-control"[tw] OR "clinical trial"[tw] OR "controlled trial"[tw] OR "intervention study"[tw] OR "intervention studies"[tw] OR "cross-sectional"[tw] OR "regression"[tw] OR "association"[tw]) | clinical trial'/exp OR ('intervention study' OR 'cohort analysis' OR 'longitudinal study' OR 'prospective study' OR 'evaluation and follow up' OR 'follow up' OR 'case control study' OR 'population based case control study' OR 'controlled study' OR 'major clinical study')/de OR (longitudinal* OR prospective* OR follow* OR associate* OR follow-up OR 'follow up' OR cohort OR later OR 'case control' OR 'case-control' OR 'clinical trial' OR 'controlled trial' OR 'intervention study' OR 'intervention studies' OR 'cross-sectional' OR 'regression'):ti,ab |
| #4<br><i>Study Design</i> |                                                                                                                                                                                                                                                                                                                                                                                                                                                                                                                                                                                                                                           |                                                                                                                                                                                                                                                                                                                                                                                                                                                                                                                                                                          |

|                                   |                                                                                                                                                                                                                                                                                                                                                                                                                                                                                                                                                                                                                                                                         |                                                                                                                                                                                                                                                                                                                                                                                                                                                                                                                                                                                                                                                                |
|-----------------------------------|-------------------------------------------------------------------------------------------------------------------------------------------------------------------------------------------------------------------------------------------------------------------------------------------------------------------------------------------------------------------------------------------------------------------------------------------------------------------------------------------------------------------------------------------------------------------------------------------------------------------------------------------------------------------------|----------------------------------------------------------------------------------------------------------------------------------------------------------------------------------------------------------------------------------------------------------------------------------------------------------------------------------------------------------------------------------------------------------------------------------------------------------------------------------------------------------------------------------------------------------------------------------------------------------------------------------------------------------------|
| #5<br>Exposure                    | <p>“Air Pollution”[Mesh] OR<br/> “Particulate Matter”[Mesh] OR<br/> “Nitrogen Dioxide”[Mesh] OR<br/> “Ozone”[Mesh] OR Volatile<br/> Organic Compounds”[Mesh] OR<br/> “Sulfur Dioxide”[Mesh] OR “Carbon<br/> Monoxide”[Mesh] OR “Vehicle<br/> Emissions”[Mesh] OR “distance to<br/> road”[tw] OR “PM10” [tw] OR<br/> “PM2.5” [tw] OR “traffic-related air<br/> pollution” [tw] OR “air pollution”<br/> [tw] OR “particulate matter” [tw]<br/> OR “ozone”[tw] OR “nitrogen<br/> dioxide”[tw] OR “particulates” [tw]<br/> OR “black carbon” [tw] OR “traffic<br/> pollution” [tw] OR “residential<br/> distance to nearest major”[tw] OR<br/> “traffic-related PM”[tw]</p> | <p>air pollution'/de OR 'air<br/> pollutant'/de OR 'particulate<br/> matter'/exp OR 'nitrogen<br/> dioxide'/exp OR 'ozone'/exp OR<br/> 'volatile organic compound'/exp<br/> OR 'sulfur dioxide'/exp OR<br/> 'exhaust gas'/exp OR 'distance to<br/> road':ab,ti OR 'pm100:ab, ti OR<br/> 'pm2.50:ab,ti OR 'traffic-related<br/> air pollution':ab,ti OR 'air<br/> pollution':ab,ti OR 'particulate<br/> matter':ab,ti OR 'ozone': ab,ti OR<br/> 'nitrogen dioxide':ab,ti OR<br/> 'particulates':ab,ti OR 'black<br/> carbon':ab,ti OR 'traffic<br/> pollution':ab,ti OR 'residential<br/> distance to nearest major':ab,ti<br/> OR trafficrelated pm':ab,ti</p> |
| #6<br>Date                        | <p>Search 1: Entrez date - Ever to<br/> 2019/06/19</p> <p>Search 2: Entrez date – 2019/06/20<br/> to 2020/07/31</p> <p>Search 3: Entrez date – 2020/08/01<br/> to 2020/12/31</p>                                                                                                                                                                                                                                                                                                                                                                                                                                                                                        | <p>Search 1: Ever to 2019/06/19</p> <p>Search 2: 2019/06/20 to<br/> 2020/07/31</p> <p>Search 3: 2020/08/01 to<br/> 2020/12/31</p>                                                                                                                                                                                                                                                                                                                                                                                                                                                                                                                              |
| #7<br>Exclude/Irrelevant<br>(NOT) | <p>“mice”[ti] OR “mouse”[ti] OR<br/> “rat”[ti] OR “rats”[ti] OR<br/> “cells”[ti] OR “plasticity”[ti] OR<br/> “synaptic”[ti] OR<br/> “signaling”[ti] OR “children”[ti] OR<br/> “children's”[ti] OR<br/> “infant”[ti] OR “infants”[ti] OR<br/> “pediatric”[ti] OR<br/> “adolescent”[ti] OR “in vivo”[ti] OR<br/> “in vitro”[ti] OR<br/> “smoking”[ti] OR “smoker”[ti] OR<br/> “second hand smoke”[ti] OR<br/> “second-hand smoke”[ti] OR<br/> “smokers”[ti] OR “environmental<br/> tobacco”[ti] OR “cigarette”[ti] OR<br/> “tobacco”[ti] OR “secondhand”[ti]<br/> OR “childhood”[ti] OR<br/> “adolescents”[ti] OR</p>                                                     | <p>('mice' OR 'mouse' OR 'rat' OR<br/> 'rats' OR 'cells' OR 'plasticity' OR<br/> 'synaptic' OR 'signaling' OR<br/> 'children' OR 'infant' OR 'infants'<br/> OR 'pediatric' OR 'adolescent' OR<br/> 'in vivo' OR 'in vitro' OR 'smoking'<br/> OR 'smoker' OR 'second hand<br/> smoke' OR 'second-hand smoke'<br/> OR 'smokers' OR 'environmental<br/> tobacco' OR 'cigarette' OR<br/> 'tobacco' OR 'secondhand' OR<br/> 'childhood' OR 'adolescents' OR<br/> 'adolescence' OR 'child' OR<br/> 'preschool' OR 'prenatal'):ti</p>                                                                                                                                 |

“adolescence”[ti] OR “child”[ti] OR  
“preschool”[ti] OR “prenatal”

Note that changes to indexing can alter search results.

Our PubMed searches were conducted on June 20, 2019 when using Entrez date of Ever to 2019/06/19; on August 13, 2020 when using Entrez date of 2019/06/20 to 2020/07/31; and on May 27, 2021 when using Entrez date of 2020/08/01 to 2020/12/31.

Our EMBASE searches were conducted on June 27, 2019 for #5 Date criterion of Ever to 2019/06/19; on August 13, 2020 when using #5 Date criterion of 2019/06/20 to 2020/07/31; and on May 27, 2021 when using #5 Date criterion of 2020/08/01 to 2020/12/31.

## Appendix C. Information Abstracted on Each Eligible Article

First Author, Year  
Cohort Name  
Geographic area  
Sample size  
Follow-up time  
Exclusions  
Total # excluded  
% excluded  
Age at outcome assessment/baseline outcome  
Race/ethnicity  
Exposures considered  
Exposure considered, detailed  
Exposure assessment method, brief  
Exposure assessment method, detailed  
Timing/average periods considered  
Exposure parameterization  
Reported exposure characteristics  
Calculated exposure characteristics  
Univariate association of exposure with confounders  
Outcome  
Outcome assessment, brief  
Outcome assessment, detailed  
Summary statistics for cognitive outcome  
Exposure period  
Cognitive outcome period  
Regression model  
Estimate, 95% interval, p-value  
Adjustment covariates  
Sensitivity analyses  
Effect modification  
Study design  
Author conclusions  
Equivalency reported  
Summary of study findings

## Appendix D: Citations for Articles for Full-Text Review

| Full Citation                                                                                                                                                                                                                                                                    | Included/excluded        | Reason for exclusion, if applicable                                                                                                                   |
|----------------------------------------------------------------------------------------------------------------------------------------------------------------------------------------------------------------------------------------------------------------------------------|--------------------------|-------------------------------------------------------------------------------------------------------------------------------------------------------|
| Ailshire J, Karraker A, Clarke P. 2017. Neighborhood social stressors, fine particulate matter air pollution, and cognitive function among older U.S. adults. <i>Soc Sci Med</i> 172:56-63.                                                                                      | Excluded                 | Paper focused on effect modification or additional covariate adjustment, paper reporting on the main effect was also available and included in review |
| Ailshire J, Walsemann KM. 2021. Education differences in the adverse impact of PM2.5 on incident cognitive impairment among U.S. older adults. <i>J Alzheimers Dis</i> 79:615-625.                                                                                               | Included                 | N/A                                                                                                                                                   |
| Ailshire JA, Clarke P. 2015. Fine particulate matter air pollution and cognitive function among U.S. older adults. <i>J Gerontol B Psychol Sci Soc Sci</i> 70:322-328.                                                                                                           | Included in prior review | N/A                                                                                                                                                   |
| Andersson J, Oudin A, Sundstrom A, Forsberg B, Adolfsso R, Nordin M. 2018. Road traffic noise, air pollution, and risk of dementia - results from the Betula project. <i>Environ Res</i> 166:334-339.                                                                            | Excluded                 | Paper focused on effect modification or additional covariate adjustment, paper reporting on the main effect was also available and included in review |
| Bernardini F, Attademo L, Trezzi R, Gobbicchi C, Balducci P, Del Bello V, et al. 2020. T125. An association between ozone, but not other air pollutants, and daily number of visits to psychiatric emergency services. <i>Schizophr Bull</i> 46:S277-S278.                       | Excluded                 | Ineligible outcome                                                                                                                                    |
| Best EA, Juarez-Colunga E, James K, LeBlanc WG, Serdar B. 2016. Biomarkers of exposure to polycyclic aromatic hydrocarbons and cognitive function among elderly in the United States (National Health and Nutrition Examination Survey: 2001-2002). <i>Plos One</i> 11:e0147632. | Excluded                 | Ineligible exposure                                                                                                                                   |
| Bowler RM, Kornblith ES, Gocheva VV, Colledge MA, Bollweg G, Kim Y, et al. 2015. Environmental exposure to manganese in air: associations with cognitive functions. <i>Neurotoxicology</i> 49:139-148.                                                                           | Excluded                 | Ineligible exposure                                                                                                                                   |
| Byrne C, Bennett K, Hickey A, Kavanagh P, Broderick B, O'Mahony M, et al. 2019. 207 Acute incidence of disease at elevated levels of fine particulate matter (PM2.5) in Dublin, Ireland. <i>Age Ageing</i> 48.                                                                   | Excluded                 | Conference abstract                                                                                                                                   |
| Cacciottolo M, Wang X, Driscoll I, Woodward N, Saffari A, Reyes J, et al. 2017. Particulate air pollutants, apoe alleles and their contributions to cognitive impairment in older women and to amyloidogenesis in experimental models. <i>Transl Psychiatry</i> 7:e1022.         | Excluded                 | Study with updated effect estimates using larger sample size within same study population became newly available and was included in review           |
| Calderon-Garciduenas L, Mukherjee PS, Kulesza RJ, Torres-Jardón R, Hernández-Luna J, Ávila-Cervantes R, et al. 2019. Mild cognitive impairment and dementia involving multiple cognitive domains in Mexican urbanites. <i>J Alzheimers Dis</i> 68:1113-1123.                     | Excluded                 | Sample included participants under 18 years old                                                                                                       |
| Carey IM, Anderson HR, Atkinson RW, Beevers SD, Cook DG, Strachan DP, et al. 2018. Are noise and air pollution related to the incidence of dementia? A cohort study in London, England. <i>BMJ Open</i> 8:e022404.                                                               | Included                 | N/A                                                                                                                                                   |
| Casanova R, Wang X, Reyes J, Akita Y, Serre M, Vizuete W, et al. 2015. Exposures to fine particulate air pollutants are associated with smaller brain volumes in older women: A voxel-based analysis. <i>Alzheimers Dement</i> 11:P148-P149.                                     | Excluded                 | Podium presentation                                                                                                                                   |
| Casanova R, Wang X, Reyes J, Akita Y, Serre ML, Vizuete W, et al. 2016. A voxel-based morphometry study reveals local brain                                                                                                                                                      | Included                 | N/A                                                                                                                                                   |



|                                                                                                                                                                                                                                                                   |                          |                                                                                                                                                       |
|-------------------------------------------------------------------------------------------------------------------------------------------------------------------------------------------------------------------------------------------------------------------|--------------------------|-------------------------------------------------------------------------------------------------------------------------------------------------------|
| structural alterations associated with ambient fine particles in older women. <i>Front Hum Neurosci</i> 10:495.                                                                                                                                                   |                          |                                                                                                                                                       |
| Cerza F, Renzi M, Gariazzo C, Davoli M, Michelozzi P, Forastiere F, et al. 2019. Long-term exposure to air pollution and hospitalization for dementia in the Rome longitudinal study. <i>Environ Health</i> 18:72.                                                | Included                 | N/A                                                                                                                                                   |
| Cerza F, Renzi M, Michelozzi P, Forastiere F, Cesaroni G. 2018. Long-term exposure to air pollution and first hospitalisation for dementia. <i>Occup Environ Med</i> 75:A1-A2.                                                                                    | Excluded                 | Podium presentation                                                                                                                                   |
| Chen C, Xun P, Kaufman J, Hayden KM, Espeland MA, Whitsel EA, et al. 2019. Adherence to MIND diet modifies the association between air pollution and brain aging: Findings from the women's health initiative memory study MRI. <i>Alzheimers Dement</i> 15:P833. | Excluded                 | Conference abstract                                                                                                                                   |
| Chen C, Xun P, Kaufman JD, Hayden KM, Espeland MA, Whitsel EA, et al. 2020. Erythrocyte omega-3 index, ambient fine particle exposure and brain aging. <i>Neurology</i> 95:e995-e1007.                                                                            | Excluded                 | Paper focused on effect modification or additional covariate adjustment, paper reporting on the main effect was also available and included in review |
| Chen H, Kwong JC, Copes R, Hystad P, van Donkelaar A, Tu K, et al. 2017. Exposure to ambient air pollution and the incidence of dementia: A population-based cohort study. <i>Environ Int</i> 108:271-277.                                                        | Included                 | N/A                                                                                                                                                   |
| Chen H, Kwong JC, Copes R, Tu K, Villeneuve PJ, van Donkelaar A, et al. 2017. Living near major roads and the incidence of dementia, Parkinson's disease, and multiple sclerosis: A population-based cohort study. <i>Lancet</i> 389:718-726.                     | Included                 | N/A                                                                                                                                                   |
| Chen JC, Wang X, Espeland MA, Chui H. 2014. Particulate air pollutants and white matter brain aging. <i>Alzheimers Dement</i> 10:P266.                                                                                                                            | Excluded                 | Conference abstract                                                                                                                                   |
| Chen JC, Wang X, Serre M, Cen S, Franklin M, Espeland M. 2017. Particulate air pollutants, brain structure, and neurocognitive disorders in older women. Research report (Health Effects Institute):1-65.                                                         | Included                 | N/A                                                                                                                                                   |
| Chen JC, Wang X, Wellenius GA, Serre ML, Driscoll I, Casanova R, et al. 2015. Ambient air pollution and neurotoxicity on brain structure: Evidence from women's health initiative memory study. <i>Ann Neurol</i> 78:466-476.                                     | Included in prior review | N/A                                                                                                                                                   |
| Chen JH, Kuo TY, Yu HL, Wu C, Yeh SL, Chiou JM, et al. 2020. Long-term exposure to air pollutants and cognitive function in Taiwanese community-dwelling older adults: A four-year cohort study. <i>J Alzheimers Dis</i> 78:1585-1600.                            | Included                 | N/A                                                                                                                                                   |
| Cho J, Sohn J, Noh J, Cho SK, Choi JE, Kim H, et al. 2018. Ambient air pollution associated with brain cortical thinning: A cross-sectional study in a community-based cohort. <i>Alzheimers Dement</i> 14:P966.                                                  | Excluded                 | Conference abstract                                                                                                                                   |
| Cho J, Sohn J, Noh J, Cho SK, Choi JE, Kim H, et al. 2019. Long-term exposure to nitrogen dioxide and brain cortical thinning. <i>Alzheimers Dement</i> 15:P829.                                                                                                  | Excluded                 | Conference abstract                                                                                                                                   |
| Cleary EG, Cifuentes M, Grinstead G, Brugge D, Shea TB. 2018. Association of low-level ozone with cognitive decline in older adults. <i>J Alzheimers Dis</i> 61:67-78.                                                                                            | Included                 | N/A                                                                                                                                                   |
| Colicino E, Giuliano G, Power MC, Lepeule J, Wilker EH, Vokonas P, et al. 2016. Long-term exposure to black carbon, cognition and single nucleotide polymorphisms in microRNA processing genes in older men. <i>Environ Int</i> 88:86-93.                         | Excluded                 | Paper focused on effect modification or additional covariate adjustment, paper reporting on the                                                       |

|                                                                                                                                                                                                                                                                        |          |                                                                                                                                                       |
|------------------------------------------------------------------------------------------------------------------------------------------------------------------------------------------------------------------------------------------------------------------------|----------|-------------------------------------------------------------------------------------------------------------------------------------------------------|
|                                                                                                                                                                                                                                                                        |          | main effect was also available and included in review                                                                                                 |
| Colicino E, Power MC, Cox DG, Weisskopf MG, Hou L, Alexeeff SE, et al. 2014. Mitochondrial haplogroups modify the effect of black carbon on age-related cognitive impairment. <i>Environ Health</i> 13:1-8.                                                            | Included | N/A                                                                                                                                                   |
| Colicino E, Wilson A, Frisardi MC, Prada D, Power MC, Hoxha M, et al. 2017. Telomere length, long-term black carbon exposure, and cognitive function in a cohort of older men: The VA normative aging study. <i>Environ Health Perspect</i> 125:76-81.                 | Excluded | Paper focused on effect modification or additional covariate adjustment, paper reporting on the main effect was also available and included in review |
| Crous-Bou M, Falcon C, Gascón M, Cirach M, Molinuevo JL, Nieuwenhuijsen M, et al. 2019. Brain correlates of air pollution in cognitively healthy individuals at risk of Alzheimer's disease. <i>Alzheimers Dement</i> 15:P1272-P1273.                                  | Excluded | Podium presentation                                                                                                                                   |
| Crous-Bou M, Gascon M, Gispert JD, Cirach M, Sánchez-Benavides G, Falcon C, et al. 2020. Impact of urban environmental exposures on cognitive performance and brain structure of healthy individuals at risk for Alzheimer's dementia. <i>Environ Int</i> 138:105546.  | Included | N/A                                                                                                                                                   |
| Cullen B, Newby D, Lee D, Lyall DM, Nevado-Holgado AJ, Evans JJ, et al. 2018. Cross-sectional and longitudinal analyses of outdoor air pollution exposure and cognitive function in UK Biobank. <i>Sci Rep-Uk</i> 8:12089.                                             | Included | N/A                                                                                                                                                   |
| Culqui DR, Linares C, Ortiz C, Carmona R, Díaz J. 2017. Association between environmental factors and emergency hospital admissions due to Alzheimer's disease in Madrid. <i>Sci Total Environ</i> 592:451-457.                                                        | Excluded | Ineligible exposure                                                                                                                                   |
| Dimakakou E, Johnston HJ, Streftaris G, Cherrie JW. 2020. Is environmental and occupational particulate air pollution exposure related to type-2 diabetes and dementia? A cross-sectional analysis of the UK Biobank. <i>Int J Environ Res Public Health</i> 17:9581.  | Included | N/A                                                                                                                                                   |
| Erickson LD, Gale SD, Anderson JE, Brown BL, Hedges DW. 2020. Association between exposure to air pollution and total gray matter and total white matter volumes in adults: A cross-sectional study. <i>Brain Sci</i> 10:164.                                          | Included | N/A                                                                                                                                                   |
| Fajersztajn L, Justo LT, Cremasco Takano AP, Veras M, Villa dos Santos N, Allen IE, et al. 2019. Long-term exposure to air pollution and dementia: A large clinicopathological study. <i>Alzheimers Dement</i> 15:P555-P556.                                           | Excluded | Podium presentation                                                                                                                                   |
| Fehsel K, Schikowski T, Jänner M, Hüls A, Voussoughi M, Schulte T, et al. 2016. Estrogen receptor beta polymorphisms and cognitive performance in women: Associations and modifications by genetic and environmental influences. <i>J Neural Transm</i> 123:1369-1379. | Excluded | Paper focused on effect modification or additional covariate adjustment, paper reporting on the main effect was also available and included in review |
| Gale SD, Erickson LD, Anderson JE, Brown BL, Hedges DW. 2020. Association between exposure to air pollution and prefrontal cortical volume in adults: A cross-sectional study from the UK Biobank. <i>Environ Res</i> 185:109365.                                      | Included | N/A                                                                                                                                                   |
| Grande G, Bellander T, Rizzuto D. 2019. Long-term exposure to air pollution and the risk of dementia: The role of cardiovascular diseases. <i>Eur J Neurol</i> 26:330.                                                                                                 | Excluded | Conference abstract                                                                                                                                   |
| Grande G, Ljungman PLS, Eneroth K, Bellander T, Rizzuto D. 2020. Association between cardiovascular disease and long-term exposure to air pollution with the risk of dementia. <i>JAMA Neurol</i> 77:801-809.                                                          | Included | N/A                                                                                                                                                   |

|                                                                                                                                                                                                                                                         |          |                                                                                                                                                       |
|---------------------------------------------------------------------------------------------------------------------------------------------------------------------------------------------------------------------------------------------------------|----------|-------------------------------------------------------------------------------------------------------------------------------------------------------|
| He F, Tang JJ, Zhang T, Lin J, Li F, Gu X, et al. 2020. Impact of air pollution on cognitive impairment in older people: A cohort study in rural and suburban China. <i>J Alzheimers Dis</i> 77:1671-1679.                                              | Included | N/A                                                                                                                                                   |
| Hedges DW, Erickson LD, Gale SD, Anderson JE, Brown BL. 2020. Association between exposure to air pollution and thalamus volume in adults: A cross-sectional study. <i>Plos One</i> 15:e0230829.                                                        | Included | N/A                                                                                                                                                   |
| Hedges DW, Erickson LD, Kunzelman J, Brown BL, Gale SD. 2019. Association between exposure to air pollution and hippocampal volume in adults in the UK Biobank. <i>Neurotoxicology</i> 74:108-120.                                                      | Included | N/A                                                                                                                                                   |
| Ho HC, Fong KN, Chan T-C, Shi Y. 2020. The associations between social, built and geophysical environment and age-specific dementia mortality among older adults in a high-density Asian city. <i>Int J Health Geogr</i> 19:1-13.                       | Excluded | Ineligible outcome                                                                                                                                    |
| Huls A, Vierkotter A, Sugiri D, Abramson MJ, Ranft U, Kramer U, et al. 2018. The role of air pollution and lung function in cognitive impairment. <i>Eur Respir J</i> 51.                                                                               | Excluded | Paper focused on effect modification or additional covariate adjustment, paper reporting on the main effect was also available and included in review |
| Iaccarino L, La Joie R, Lesman-Segev OH, Lee E, Hanna L, Allen IE, et al. 2021. Association between ambient air pollution and amyloid positron emission tomography positivity in older adults with cognitive impairment. <i>JAMA Neurol</i> 78:197-207. | Included | N/A                                                                                                                                                   |
| Ilango SD, Chen H, Hystad P, van Donkelaar A, Kwong JC, Tu K, et al. 2020. The role of cardiovascular disease in the relationship between air pollution and incident dementia: A population-based cohort study. <i>Int J of Epidemiol</i> 49:36-44.     | Included | N/A                                                                                                                                                   |
| Kim H, Noh J, Noh Y, Oh SS, Koh SB, Kim C. 2019. Gender difference in the effects of outdoor air pollution on cognitive function among elderly in Korea. <i>Front Public Health</i> 7:375.                                                              | Included | N/A                                                                                                                                                   |
| Kioumourtzoglou MA, Schwartz JD, Weisskopf MG, Melly SJ, Wang Y, Dominici F, et al. 2016. Long-term PM2.5 exposure and neurological hospital admissions in the northeastern United States. <i>Environ Health Perspect</i> 124:23-29.                    | Excluded | Study with updated effect estimates using larger sample size within same study population became newly available and was included in review           |
| Klomp maker JO, Hoek G, Bloem sma LD, Marra M, Wijga AH, van den Brink C, et al. 2020. Surrounding green, air pollution, traffic noise exposure and non-accidental and cause-specific mortality. <i>Environ Int</i> 134:105341.                         | Excluded | Ineligible outcome                                                                                                                                    |
| Kulick E, Wellenius G, Boehme A, Schupf N, Mayeux R, Sacco R, et al. 2019. Long-term exposure to ambient air pollution and trajectories of cognitive decline among older adults in northern manhattan. <i>Neurology</i> 92.                             | Excluded | Conference abstract                                                                                                                                   |
| Kulick ER, Elkind MSV, Boehme AK, Joyce NR, Schupf N, Kaufman JD, et al. 2020. Long-term exposure to ambient air pollution, apoe-ε4 status, and cognitive decline in a cohort of older adults in northern Manhattan. <i>Environ Int</i> 136:105440.     | Excluded | Paper focused on effect modification or additional covariate adjustment, paper reporting on the main effect was also available and included in review |
| Kulick ER, Wellenius GA, Boehme AK, Joyce NR, Schupf N, Kaufman JD, et al. 2020. Long-term exposure to air pollution and trajectories of cognitive decline among older adults. <i>Neurology</i> 94:e1782-e1792.                                         | Included | N/A                                                                                                                                                   |
| Kulick ER, Wellenius GA, Kaufman JD, DeRosa JT, Kinney PL, Cheung YK, et al. 2017. Long-term exposure to ambient air pollution and subclinical cerebrovascular disease in NOMAS (the northern Manhattan study). <i>Stroke</i> 48:1966-1968.             | Included | N/A                                                                                                                                                   |

|                                                                                                                                                                                                                                                                                     |                          |                                                                                                                                             |
|-------------------------------------------------------------------------------------------------------------------------------------------------------------------------------------------------------------------------------------------------------------------------------------|--------------------------|---------------------------------------------------------------------------------------------------------------------------------------------|
| Lee J, Dey A. 2020. Introduction to LASI-DAD: The longitudinal aging study in India-diagnostic assessment of dementia. <i>J Am Geriatr Soc</i> 68:S3-S4.                                                                                                                            | Excluded                 | Editorial                                                                                                                                   |
| Lee JH, Byun MS, Yi D, Ko K, Jeon SY, Kim WJ, et al. 2018. Association of long-term exposure to air particulate matter with cerebral amyloid deposition and gray matter changes in cognitively normal older adults. <i>Alzheimers Dement</i> 14:P1420.                              | Excluded                 | Conference abstract                                                                                                                         |
| Lee M, Schwartz J, Wang Y, Dominici F, Zanobetti A. 2019. Long-term effect of fine particulate matter on hospitalization with dementia. <i>Environ Pollut</i> 254:112926.                                                                                                           | Excluded                 | Study with updated effect estimates using larger sample size within same study population became newly available and was included in review |
| Li CY, Li CH, Martini S, Hou WH. 2019. Association between air pollution and risk of vascular dementia: A multipollutant analysis in Taiwan. <i>Environ Int</i> 133:105233.                                                                                                         | Included                 | N/A                                                                                                                                         |
| Li RL, Ho YC, Luo CW, Lee SS, Kuan YH. 2019. Influence of PM(2.5) exposure level on the association between Alzheimer's disease and allergic rhinitis: A national population-based cohort study. <i>Int J Environ Res Public Health</i> 16:3357.                                    | Excluded                 | Ineligible exposure                                                                                                                         |
| Lin H, Guo Y, Zheng Y, Zhao X, Cao Z, Rigdon SE, et al. 2017. Exposure to ambient PM2.5 associated with overall and domain-specific disability among adults in six low- and middle-income countries. <i>Environ Int</i> 104:69-75.                                                  | Excluded                 | Ineligible outcome                                                                                                                          |
| Linares C, Culqui D, Carmona R, Ortiz C, Diaz J. 2017. Short-term association between environmental factors and hospital admissions due to dementia in Madrid. <i>Environ Res</i> 152:214-220.                                                                                      | Excluded                 | Ineligible exposure                                                                                                                         |
| Lo YC, Lu YC, Chang YH, Kao S, Huang HB. 2019. Air pollution exposure and cognitive function in Taiwanese older adults: A repeated measurement study. <i>Int J Environ Res Public Health</i> 16:2976.                                                                               | Included                 | N/A                                                                                                                                         |
| Loop MS, Kent ST, Al-Hamdan MZ, Crosson WL, Estes SM, Estes Jr MG, et al. 2013. Fine particulate matter and incident cognitive impairment in the reasons for geographic and racial differences in stroke (REGARDS) cohort. <i>Plos One</i> 8:e75001.                                | Included in prior review | N/A                                                                                                                                         |
| Lucchini RG, Guazzetti S, Zoni S, Benedetti C, Fedrighi C, Peli M, et al. 2014. Neurofunctional dopaminergic impairment in elderly after lifetime exposure to manganese. <i>Neurotoxicology</i> 45:309-317.                                                                         | Excluded                 | Ineligible exposure                                                                                                                         |
| Malmqvist E, Jensen EL, Westerberg K, Stroh E, Rittner R, Gustafsson S, et al. 2018. Estimated health benefits of exhaust free transport in the city of Malmö, southern Sweden. <i>Environ Int</i> 118:78-85.                                                                       | Excluded                 | No original effect estimates                                                                                                                |
| Marabotti C, Piaggi P, Scarsi P, Venturini E, Cecchi R, Pingitore A. 2017. Mortality for chronic-degenerative diseases in Tuscany: Ecological study comparing neighboring areas with substantial differences in environmental pollution. <i>Int J Occup Environ Med</i> 30:641-653. | Excluded                 | Ineligible outcome                                                                                                                          |
| Mueller N, Rojas-Rueda D, Basagaña X, Cirach M, Cole-Hunter T, Dadvand P, et al. 2017. Health impacts related to urban and transport planning: A burden of disease assessment. <i>Environ Int</i> 107:243-257.                                                                      | Excluded                 | Ineligible outcome                                                                                                                          |
| Nicolle-Mir L. 2016. Exposure to PM2.5 and hospitalizations for neurodegenerative diseases in the Medicare cohort. <i>Environnement, Risques et Sante</i> 15:280-281.                                                                                                               | Excluded                 | Article review                                                                                                                              |

|                                                                                                                                                                                                                                                                                |                          |                                                                                                                                                       |
|--------------------------------------------------------------------------------------------------------------------------------------------------------------------------------------------------------------------------------------------------------------------------------|--------------------------|-------------------------------------------------------------------------------------------------------------------------------------------------------|
| Nicolle-Mir L. 2016. Traffic-related pollution and incidence of dementia: Longitudinal study at Umeå. <i>Environnement, Risques et Sante</i> 15:281-283.                                                                                                                       | Excluded                 | Article review                                                                                                                                        |
| Nußbaum R, Lucht S, Jockwitz C, Moebus S, Engel M, Jöckel KH, et al. 2020. Associations of air pollution and noise with local brain structure in a cohort of older adults. <i>Environ Health Perspect</i> 128:67012.                                                           | Included                 | N/A                                                                                                                                                   |
| Oudin A, Andersson J, Sundström A, Nordin Adolfsson A, Oudin Åström D, Adolfsson R, et al. 2019. Traffic-related air pollution as a risk factor for dementia: No clear modifying effects of apoeε4 in the Betula cohort. <i>J Alzheimers Dis</i> 71:733-740.                   | Excluded                 | Paper focused on effect modification or additional covariate adjustment, paper reporting on the main effect was also available and included in review |
| Oudin A, Forsberg B, Adolfsson AN, Lind N, Modig L, Nordin M, et al. 2016. Traffic-related air pollution and dementia incidence in northern Sweden: A longitudinal study. <i>Environ Health Perspect</i> 124:306-312.                                                          | Included in prior review | N/A                                                                                                                                                   |
| Oudin A, Forsberg B, Lind N, Nordin S, Astrom DO, Sundstrom A, et al. 2017. Is long-term exposure to air pollution associated with episodic memory? A longitudinal study from northern Sweden. <i>Sci Rep-Uk</i> 7:1-7.                                                        | Included                 | N/A                                                                                                                                                   |
| Oudin A, Segersson D, Adolfsson R, Forsberg B. 2018. Association between air pollution from residential wood burning and dementia incidence in a longitudinal study in northern Sweden. <i>Plos One</i> 13:e0198283.                                                           | Included                 | N/A                                                                                                                                                   |
| Paul KC, Haan M, Yu Y, Inoue K, Mayeda ER, Dang K, et al. 2020. Traffic-related air pollution and incident dementia: Direct and indirect pathways through metabolic dysfunction. <i>J Alzheimers Dis</i> 76:1477-1491.                                                         | Included                 | N/A                                                                                                                                                   |
| Petkus AJ, Younan D, Wang X, Beavers DP, Espeland MA, Gatz M, et al. 2021. Air pollution and the dynamic association between depressive symptoms and memory in oldest-old women. <i>J Am Geriatr Soc</i> 69:474-484.                                                           | Included                 | N/A                                                                                                                                                   |
| Petkus AJ, Younan D, Widaman K, Gatz M, Manson JE, Wang X, et al. 2020. Exposure to fine particulate matter and temporal dynamics of episodic memory and depressive symptoms in older women. <i>Environ Int</i> 135:105196.                                                    | Included                 | N/A                                                                                                                                                   |
| Petkus AJ, Younan D, Widaman KF, Wang X, Casanova R, Espeland MA, et al. 2019. The association between particulate matter and episodic memory decline is partially mediated by early neuroanatomic biomarkers of alzheimer's disease. <i>Alzheimers Dement</i> 15:P1271-P1272. | Excluded                 | Podium presentation                                                                                                                                   |
| Power MC, Lamichhane AP, Liao D, Xu X, Jack CR, Gottesman RF, et al. 2018. The association of long-term exposure to particulate matter air pollution with brain MRI findings: The ARIC study. <i>Environ Health Perspect</i> 126:027009.                                       | Included                 | N/A                                                                                                                                                   |
| Qiu H, Zhu X, Wang L, Pan J, Pu X, Zeng X, et al. 2019. Attributable risk of hospital admissions for overall and specific mental disorders due to particulate matter pollution: A time-series study in Chengdu, China. <i>Environ Res</i> 170:230-237.                         | Excluded                 | Ineligible exposure                                                                                                                                   |
| Ran J, Schooling CM, Han L, Sun S, Zhao S, Zhang X, et al. 2021. Long-term exposure to fine particulate matter and dementia incidence: A cohort study in Hong Kong. <i>Environ Pollut</i> 271:116303.                                                                          | Included                 | N/A                                                                                                                                                   |
| Rocha D, Suemoto CK, Souza Santos I, Lotufo PA, Benseñor I, Gouveia N. 2020. Vehicular traffic density and cognitive performance in the ELSA-Brasil study. <i>Environ Res</i> 191:110208.                                                                                      | Included                 | N/A                                                                                                                                                   |

|                                                                                                                                                                                                                                                                                            |          |                                                                                                                                                       |
|--------------------------------------------------------------------------------------------------------------------------------------------------------------------------------------------------------------------------------------------------------------------------------------------|----------|-------------------------------------------------------------------------------------------------------------------------------------------------------|
| Russ T, Murianni L, Icaza G, Slachevsky A, Starr J. 2016. Geographical variation in dementia mortality in Italy, New Zealand, and Chile: The impact of latitude, vitamin D, and air pollution. <i>Dement Geriatr Cogn Dis</i> 42:31-41.                                                    | Excluded | No measure of exposure                                                                                                                                |
| Russ TC, Cherrie MP, Dibben C, Tomlinson SJ, Reis S, Dragosits U, et al. 2018. Life course air pollution exposure and cognitive decline in Scotland: Modelled historical air pollution data and the Lothian birth cohort 1936. <i>Alzheimers Dement</i> 14:P1381.                          | Excluded | Conference abstract                                                                                                                                   |
| Salinas-Rodriguez A, Fernandez-Nino JA, Manrique-Espinoza B, Moreno-Banda GL, Sosa-Ortiz AL, Qian ZM, et al. 2018. Exposure to ambient PM2.5 concentrations and cognitive function among older Mexican adults. <i>Environ Int</i> 117:1-9.                                                 | Included | N/A                                                                                                                                                   |
| Salm AK, Benson MJ. 2019. Increased dementia mortality in West Virginia counties with mountaintop removal mining? <i>Int J Environ Res Public Health</i> 16:4278.                                                                                                                          | Excluded | Ineligible exposure                                                                                                                                   |
| Sánchez-Benavides G, Gascón M, Gramunt N, Gotsens X, Fauria K, Gispert JD, et al. 2017. Exposure to air pollution and cognitive performance of healthy individuals at risk for Alzheimer's disease. <i>Alzheimers Dement</i> 13:P564-P565.                                                 | Excluded | Podium presentation                                                                                                                                   |
| Shi L, Wu X, Danesh Yazdi M, Braun D, Abu Awad Y, Wei Y, et al. 2020. Long-term effects of PM(2·5) on neurological disorders in the American Medicare population: A longitudinal cohort study. <i>Lancet Planet Health</i> 4:e557-e565.                                                    | Included | N/A                                                                                                                                                   |
| Shin J, Han SH, Choi J. 2019. Exposure to ambient air pollution and cognitive impairment in community-dwelling older adults: The Korean frailty and aging cohort study. <i>Int J Environ Res Public Health</i> 16:3767.                                                                    | Included | N/A                                                                                                                                                   |
| Smargiassi A, Sidi EAL, Robert LE, Plante C, Haddad M, Gamache P, et al. 2020. Exposure to ambient air pollutants and the onset of dementia in Québec, Canada. <i>Environ Res</i> 190:109870.                                                                                              | Included | N/A                                                                                                                                                   |
| Tallon LA, Manjourides J, Pun VC, Salhi C, Suh H. 2017. Cognitive impacts of ambient air pollution in the national social health and aging project (NSHAP) cohort. <i>Environ Int</i> 104:102-109.                                                                                         | Included | N/A                                                                                                                                                   |
| Tzivian L, Dlugaj M, Winkler A, Hennig F, Fuks K, Sugiri D, et al. 2016. Long-term air pollution and traffic noise exposures and cognitive function: A cross-sectional analysis of the Heinz Nixdorf recall study. <i>J Toxicol Environ Health A</i> 79:1057-1069.                         | Included | N/A                                                                                                                                                   |
| Tzivian L, Dlugaj M, Winkler A, Weinmayr G, Hennig F, Fuks KB, et al. 2016. Long-term air pollution and traffic noise exposures and mild cognitive impairment in older adults: A cross-sectional analysis of the Heinz Nixdorf recall study. <i>Environ Health Perspect</i> 124:1361-1368. | Excluded | Paper focused on effect modification or additional covariate adjustment, paper reporting on the main effect was also available and included in review |
| Tzivian L, Jokisch M, Winkler A, Weimar C, Hennig F, Sugiri D, et al. 2017. Associations of long-term exposure to air pollution and road traffic noise with cognitive function-an analysis of effect measure modification. <i>Environ Int</i> 103:30-38.                                   | Excluded | Paper focused on effect modification or additional covariate adjustment, paper reporting on the main effect was also available and included in review |
| Vossoughi M, Vierkotter A, Sugiri D, Probst-Hensch N, Stolz S, Luckhaus C, et al. 2015. The roles of lung function and air pollution on cognitive decline: Predictor and mediator? <i>Am J Respir Crit Care Med</i> 191.                                                                   | Excluded | Conference abstract                                                                                                                                   |
| Wang J, Li T, Lv Y, Kraus VB, Zhang Y, Mao C, et al. 2020. Fine particulate matter and poor cognitive function among Chinese older adults: Evidence from a community-based, 12-year prospective cohort study. <i>Environ Health Perspect</i> 128:67013.                                    | Included | N/A                                                                                                                                                   |

|                                                                                                                                                                                                                                                                                     |                          |                     |
|-------------------------------------------------------------------------------------------------------------------------------------------------------------------------------------------------------------------------------------------------------------------------------------|--------------------------|---------------------|
| Wang JN, Wang Q, Li TT, Shi XM. 2017. [Association between air pollution and cognitive function in the elderly]. <i>Zhonghua yu fang yi xue za zhi</i> [Chinese journal of preventive medicine] 51:364-368.                                                                         | Excluded                 | Review article      |
| Wilker EH, Martinez-Ramirez S, Kloog I, Schwartz J, Mostofsky E, Koutrakis P, et al. 2016. Fine particulate matter, residential proximity to major roads, and markers of small vessel disease in a memory study population. <i>J Alzheimers Dis</i> 53:1315-1323.                   | Included                 | N/A                 |
| Wilker EH, Mittleman MA, Kloog I, Schwartz J, Koutrakis P, Blacker D. 2016. Exposure to ambient air pollution and repeated measures of executive function. <i>Alzheimers Dement</i> 12:P600.                                                                                        | Excluded                 | Conference abstract |
| Wilker EH, Preis SR, Beiser AS, Wolf PA, Au R, Kloog I, et al. 2015. Long-term exposure to fine particulate matter, residential proximity to major roads and measures of brain structure. <i>Stroke</i> 46:1161-1166.                                                               | Included in prior review | N/A                 |
| Wu SM, Chen ZF, Young L, Shiao SPK. 2017. Meta-prediction of the effect of methylenetetrahydrofolate reductase polymorphisms and air pollution on Alzheimer's disease risk. <i>Int J Environ Res Public Health</i> 14:63.                                                           | Excluded                 | Meta-analysis       |
| Wu YC, Lin YC, Yu HL, Chen JH, Chen TF, Sun Y, et al. 2015. Association between air pollutants and dementia risk in the elderly. <i>Alzheimer Dement: Diagnosis, Assessment &amp; Disease Monitoring</i> 1:220-228.                                                                 | Included                 | N/A                 |
| Wurth R, Kioumourtzoglou MA, Tucker KL, Griffith J, Manjourides J, Suh H. 2018. Fine particle sources and cognitive function in an older Puerto Rican cohort in greater Boston. <i>Environ Epidemiol</i> 2:e022.                                                                    | Included                 | N/A                 |
| Yang SM, Lin YC, Yu HL, Chen JH, Chen TF, Sun Y, et al. 2017. Association between PM10 exposure, coffee or tea consumption, and dementia risk in the elderly. <i>Alzheimers Dement</i> 13:P1196-P1197.                                                                              | Excluded                 | Conference abstract |
| Yao Y, Jin X, Cao K, Zhao M, Zhu T, Zhang J, et al. 2021. Residential proximity to major roadways and cognitive function among Chinese adults 65 years and older. <i>Sci Total Environ</i> 766:142607.                                                                              | Included                 | N/A                 |
| Younan D, Petkus AJ, Wang X, Resnick SM, Serre M, Vizuete W, et al. 2019. Heterogeneity in the increased risk for Alzheimer's disease and related dementias associated with fine particle exposure: Exploring the role of cognitive reserve. <i>Alzheimers Dement</i> 15:P833-P834. | Excluded                 | Conference abstract |
| Younan D, Petkus AJ, Widaman KF, Wang X, Casanova R, Espeland MA, et al. 2020. Particulate matter and episodic memory decline mediated by early neuroanatomic biomarkers of Alzheimer's disease. <i>Brain</i> 143:289-302.                                                          | Included                 | N/A                 |
| Younan D, Wang X, Casanova R, Barnard R, Gaussoin SA, Saldana S, et al. 2020. PM2.5 associated with gray matter atrophy reflecting increased Alzheimers risk in older women. <i>Neurology</i> 96:e1190-e1201.                                                                       | Included                 | N/A                 |
| Younan D, Wang X, Lurmann F, Serre M, Vizuete W, He K, et al. 2018. Racial-ethnic disparities in Alzheimer's risk: Role of exposure to ambient fine particles. <i>Alzheimers Dement</i> 14:P1613.                                                                                   | Excluded                 | Conference abstract |
| Younan D, Wang X, Petkus AJ, Casanova R, Barnard R, Gaussoin SA, et al. 2018. Environmental determinants of neuroanatomic risk for Alzheimer's disease in older women: Role of fine particulate matter. <i>Alzheimer Dement</i> 14:P278.                                            | Excluded                 | Conference abstract |

|                                                                                                                                                                                                                            |          |                                                                                                                                                            |
|----------------------------------------------------------------------------------------------------------------------------------------------------------------------------------------------------------------------------|----------|------------------------------------------------------------------------------------------------------------------------------------------------------------|
| Yuchi W, Sbihi H, Davies H, Tamburic L, Brauer M. 2020. Road proximity, air pollution, noise, green space and neurologic disease incidence: A population-based cohort study. <i>Environ Health</i> 19:8.                   | Included | N/A                                                                                                                                                        |
| Zhang HW, Kok VC, Chuang SC, Tseng CH, Lin CT, Li TC, et al. 2019. Long-term exposure to ambient hydrocarbons increases dementia risk in people aged 50 years and above in Taiwan. <i>Curr Alzheimer Res</i> 16:1276-1289. | Excluded | Ineligible exposure                                                                                                                                        |
| Zhang X, Chen X, Zhang X. 2018. The impact of exposure to air pollution on cognitive performance. <i>Proc Natl Acad Sci USA</i> 115:9193-9197.                                                                             | Excluded | Sample included participants under 18 years old, and no estimated effects of air pollution reported specifically for subgroup of persons 18 years or older |



**Table S1: Associations between air pollution exposure and cognitive level in qualifying studies <sup>a, b</sup>**

| Paper                 | N     | Exposure        | Cognitive domain   | Test(s)                                                                                                                                                         | Difference in SD units per common exposure contrast <sup>c</sup> | Other difference |                        |                   |
|-----------------------|-------|-----------------|--------------------|-----------------------------------------------------------------------------------------------------------------------------------------------------------------|------------------------------------------------------------------|------------------|------------------------|-------------------|
|                       |       |                 |                    |                                                                                                                                                                 | Difference (95% CI)                                              | Outcome          | Measure of association | Exposure contrast |
| Crous-Bou 2020 (ALFA) | 958   | NO <sub>2</sub> | Global             | Modified-PACC composite                                                                                                                                         | 2.60 (-14.31, 19.52)                                             |                  |                        |                   |
|                       |       |                 | Memory             | Memory binding test                                                                                                                                             | 21.93 (4.56, 39.30)                                              |                  |                        |                   |
|                       |       |                 | Executive function | WAIS-IV subtests                                                                                                                                                | -9.68 (-24.62, 5.25)                                             |                  |                        |                   |
| Kulick 2020 (NOMAS)   | 1,093 | NO <sub>2</sub> | Global             | Global cognitive score                                                                                                                                          | 0.05 (-0.03, 0.14)                                               |                  |                        |                   |
|                       |       |                 | Memory             | Modified California Verbal Learning Test                                                                                                                        | 0.08 (-0.07, 0.22)                                               |                  |                        |                   |
|                       |       |                 | Executive function | (Color Trails 2-Color Trails 1), Controlled Oral Word Association Test, Odd Man Out, Digit Reordering                                                           | 0.02 (-0.13, 0.16)                                               |                  |                        |                   |
|                       |       |                 | Executive function | Boston Naming Test (15-item), Animal Naming, Color Trails 2, Color Trails 1, Grooved Pegboard, Letter-Number Sequencing, Symbol Digit Modalities                | 0.18 (0.03, 0.31)                                                |                  |                        |                   |
| Kulick 2020 (WHICAP)  | 5,330 | NO <sub>2</sub> | Global             | Global cognitive score                                                                                                                                          | -0.09 (-0.13, -0.06)                                             |                  |                        |                   |
|                       |       |                 | Memory             | Selective reminding test                                                                                                                                        | -0.08 (-0.12, -0.04)                                             |                  |                        |                   |
|                       |       |                 | Executive function | (Color Trails 2-Color Trails 1), Controlled Oral Word Association Test, Identities and Oddities; similarities subset from the Wechsler Adult Intelligence Scale | -0.10 (-0.14, -0.07)                                             |                  |                        |                   |
|                       |       |                 | Executive function | Boston Naming Test (15-item), Animal Naming, Comprehension subtest from the Boston Diagnostic Aphasia Exam, Color Trails 2, Color Trails 1                      | -0.10 (-0.14, -0.06)                                             |                  |                        |                   |

|                              |                |                 |                    |                                                                                                                                                         |                            |                          |                     |
|------------------------------|----------------|-----------------|--------------------|---------------------------------------------------------------------------------------------------------------------------------------------------------|----------------------------|--------------------------|---------------------|
| Nußbaum 2020<br>(1000BRAINS) | 615            | NO <sub>2</sub> | Memory             | Benton figural memory test; Verbaler Gedächtnistest (VGT) verbal learning test; VGT delayed                                                             | Test score rank Difference | Per 10 µg/m <sup>3</sup> | 0.02 (-0.06, 0.09)  |
|                              |                |                 | Memory             | Visual-Pattern-test; Block-tapping test (BTT) forwards; BTT backwards; Zahlennachsprechen (ZNS) verbal memory test forwards; ZNS backwards              | Test score rank Difference | Per 10 µg/m <sup>3</sup> | 0.04 (-0.02, 0.09)  |
|                              |                |                 | Executive function | Subtest 3 of "Leistungsprüfungssystem 50+", problem solving test; Fünf-Punkte figural fluency test; Trail making test B-A; Color-Word Interference Test | Test score rank Difference | Per 10 µg/m <sup>3</sup> | 0.04 (-0.04, 0.09)  |
|                              |                |                 | Executive function | Regensburger Wortflüssigkeitstest phonemic fluency and semantic fluency tests; Wortschatztest vocabulary test                                           | Test score rank Difference | Per 10 µg/m <sup>3</sup> | 0 (-0.08, 0.06)     |
|                              |                |                 | Executive function | Alters-Konzentrations selective attention test; Trail Making test (part A)                                                                              | Test score rank Difference | Per 10 µg/m <sup>3</sup> | 0.02 (-0.08, 0.09)  |
| Schikowski 2015<br>(SALIA)   | 789            | NO <sub>2</sub> | Global             | MMSE                                                                                                                                                    |                            |                          | 0 (-0.14, 0.14)     |
|                              |                |                 | Global             | CERaD total score                                                                                                                                       |                            |                          | -0.12 (-0.26, 0.02) |
|                              |                |                 | Memory             | Word list learning                                                                                                                                      |                            |                          | -0.01 (-0.15, 0.13) |
|                              |                |                 | Memory             | Word list recall                                                                                                                                        |                            |                          | 0.03 (-0.11, 0.17)  |
|                              |                |                 | Memory             | Figure recall                                                                                                                                           |                            |                          | -0.04 (-0.17, 0.11) |
|                              |                |                 | Memory             | Boston naming test                                                                                                                                      |                            |                          | -0.13 (-0.27, 0.01) |
|                              |                |                 | Executive function | Semantic fluency                                                                                                                                        |                            |                          | 0.00 (-0.14, 0.14)  |
|                              |                |                 | Executive function | Phonemic fluency                                                                                                                                        |                            |                          | -0.08 (-0.21, 0.06) |
|                              |                |                 | Executive function | Trail making A                                                                                                                                          |                            |                          | -0.06 (-0.20, 0.06) |
|                              |                |                 | Executive function | Trail making B                                                                                                                                          |                            |                          | -0.07 (-0.21, 0.06) |
|                              |                |                 | Executive function | Trail making B/A                                                                                                                                        |                            |                          | -0.01 (-0.15, 0.13) |
| Other                        | Figure copying |                 |                    | -0.21 (-0.36, -0.08)                                                                                                                                    |                            |                          |                     |
| Shin 2019 (KFACS)            | 2,896          | NO <sub>2</sub> | Global             | MMSE-KC                                                                                                                                                 | Log(test score) Difference | Per 10 µg/m <sup>3</sup> | 0.01 (0.00, 0.02)   |

|                                     |       |                 |                    |                                                                                                                                            |  |                                         |                          |                          |                   |
|-------------------------------------|-------|-----------------|--------------------|--------------------------------------------------------------------------------------------------------------------------------------------|--|-----------------------------------------|--------------------------|--------------------------|-------------------|
|                                     |       |                 | Memory             | Digit forward span                                                                                                                         |  | Log(test score) Difference              | Per 10 µg/m <sup>3</sup> | -0.02 (-0.03, 0.00)      |                   |
|                                     |       |                 | Memory             | Digit backward span                                                                                                                        |  | Log(test score) Difference              | Per 10 µg/m <sup>3</sup> | 0.01 (-0.01, 0.03)       |                   |
|                                     |       |                 | Memory             | Word list memory                                                                                                                           |  | Log(test score) Difference              | Per 10 µg/m <sup>3</sup> | 0.02 (0.00, 0.04)        |                   |
|                                     |       |                 | Memory             | Word list recall                                                                                                                           |  | Log(test score) Difference              | Per 10 µg/m <sup>3</sup> | -0.01 (-0.02, 0.00)      |                   |
|                                     |       |                 | Memory             | Recall storage                                                                                                                             |  | Log(test score) Difference              | Per 10 µg/m <sup>3</sup> | 0.00 (-0.03, 0.01)       |                   |
|                                     |       |                 | Memory             | Word list recognition                                                                                                                      |  | Log(test score) Difference              | Per 10 µg/m <sup>3</sup> | 0.00 (-0.01, 0.01)       |                   |
|                                     |       |                 | Executive function | FAB score                                                                                                                                  |  | Log(test score) Difference              | Per 10 µg/m <sup>3</sup> | -0.01 (-0.02, 0.00)      |                   |
| Tallon 2017 (NSHAP)                 | 2,106 | NO <sub>2</sub> | Global             | Modified MoCA                                                                                                                              |  |                                         |                          | -0.06 (-0.10, -0.02)     |                   |
| Tzivian 2016 (Heinz Nixdorf RECALL) | 4,050 | NO <sub>2</sub> | Global             | Global cognitive score                                                                                                                     |  |                                         |                          | -0.06 (-0.09, -0.01)     |                   |
|                                     |       |                 | Memory             | 8 word immediate recall                                                                                                                    |  |                                         |                          | -0.07 (-0.13, 0.02)      |                   |
|                                     |       |                 | Memory             | 8 word delayed recall                                                                                                                      |  |                                         |                          | -0.07 (-0.11, 0.02)      |                   |
|                                     |       |                 | Executive function | Semantic fluency                                                                                                                           |  |                                         |                          | -0.10 (-0.16, -0.03)     |                   |
|                                     |       |                 | Executive function | Labyrinth test                                                                                                                             |  |                                         |                          | -0.05 (-0.11, 0.02)      |                   |
|                                     |       |                 | Other              | Clock drawing                                                                                                                              |  | Poor performance (score <sub>≥</sub> 3) | OR                       | Per 10 µg/m <sup>3</sup> | 1.02 (0.87, 1.20) |
| Crous-Bou 2020 (ALFA)               | 958   | NO <sub>x</sub> | Global             | Modified-PACC composite                                                                                                                    |  |                                         |                          | 7.67 (-35.29, 50.63)     |                   |
|                                     |       |                 | Memory             | Memory binding test                                                                                                                        |  |                                         |                          | 49.20 (4.88, 93.53)      |                   |
|                                     |       |                 | Executive function | WAIS-IV subtests                                                                                                                           |  |                                         |                          | -20.63 (-58.90, 17.63)   |                   |
| Nußbaum 2020 (1000BRAINS)           | 615   | NO <sub>x</sub> | Memory             | Benton figural memory test; Verbaler Gedächtnistest (VGT) verbal learning test; VGT delayed                                                |  | Test score rank Difference              | Per 10 µg/m <sup>3</sup> | 0.01 (-0.01, 0.04)       |                   |
|                                     |       |                 | Memory             | Visual-Pattern-test; Block-tapping test (BTT) forwards; BTT backwards; Zahlennachsprechen (ZNS) verbal memory test forwards; ZNS backwards |  | Test score rank Difference              | Per 10 µg/m <sup>3</sup> | 0.01 (-0.01, 0.04)       |                   |

|                                     |       |                 |                    |                                                                                                                                                         |                            |                          |                      |
|-------------------------------------|-------|-----------------|--------------------|---------------------------------------------------------------------------------------------------------------------------------------------------------|----------------------------|--------------------------|----------------------|
|                                     |       |                 | Executive function | Subtest 3 of "Leistungsprüfungssystem 50+", problem solving test; Fünf-Punkte figural fluency test; Trail making test B-A; Color-Word Interference Test | Test score rank Difference | Per 10 µg/m <sup>3</sup> | 0.01 (-0.02, 0.04)   |
|                                     |       |                 | Executive function | Regensburger Wortflüssigkeitstest phonemic fluency and semantic fluency tests; Wortschatztest vocabulary test                                           | Test score rank Difference | Per 10 µg/m <sup>3</sup> | -0.01 (-0.04, 0.02)  |
|                                     |       |                 | Executive function | Alters-Konzentrations selective attention test; Trail Making test (part A)                                                                              | Test score rank Difference | Per 10 µg/m <sup>3</sup> | -0.01 (-0.05, 0.02)  |
| Schikowski 2015 (SALIA)             | 789   | NO <sub>x</sub> | Global             | MMSE                                                                                                                                                    |                            |                          | -0.01 (-0.07, 0.04)  |
|                                     |       |                 | Global             | CERaD total score                                                                                                                                       |                            |                          | -0.06 (-0.11, 0.00)  |
|                                     |       |                 | Memory             | Word list learning                                                                                                                                      |                            |                          | -0.01 (-0.07, 0.04)  |
|                                     |       |                 | Memory             | Word list recall                                                                                                                                        |                            |                          | 0.00 (-0.06, 0.05)   |
|                                     |       |                 | Memory             | Figure recall                                                                                                                                           |                            |                          | -0.02 (-0.08, 0.04)  |
|                                     |       |                 | Memory             | Boston naming test                                                                                                                                      |                            |                          | -0.06 (-0.11, 0.00)  |
|                                     |       |                 | Executive function | Semantic fluency                                                                                                                                        |                            |                          | 0.00 (-0.05, 0.06)   |
|                                     |       |                 | Executive function | Phonemic fluency                                                                                                                                        |                            |                          | -0.03 (-0.09, 0.02)  |
|                                     |       |                 | Executive function | Trail making A                                                                                                                                          |                            |                          | -0.03 (-0.08, 0.03)  |
|                                     |       |                 | Executive function | Trail making B                                                                                                                                          |                            |                          | -0.04 (-0.09, 0.02)  |
|                                     |       |                 | Executive function | Trail making B/A                                                                                                                                        |                            |                          | -0.01 (-0.06, 0.04)  |
|                                     |       |                 | Other              | Figure copying                                                                                                                                          |                            |                          | -0.08 (-0.14, -0.03) |
| Tzivian 2016 (Heinz Nixdorf RECALL) | 4,050 | NO <sub>x</sub> | Global             | Global cognitive score                                                                                                                                  |                            |                          | -0.03 (-0.05, -0.01) |
|                                     |       |                 | Memory             | 8 word immediate recall                                                                                                                                 |                            |                          | -0.03 (-0.05, -0.01) |
|                                     |       |                 | Memory             | 8 word delayed recall                                                                                                                                   |                            |                          | -0.03 (-0.05, -0.01) |
|                                     |       |                 | Executive function | Semantic fluency                                                                                                                                        |                            |                          | -0.05 (-0.08, -0.02) |

|                        |       |                  |                    |                                                |                      |                                         |    |                          |                     |
|------------------------|-------|------------------|--------------------|------------------------------------------------|----------------------|-----------------------------------------|----|--------------------------|---------------------|
|                        |       |                  | Executive function | Labyrinth test                                 | -0.04 (-0.06, -0.01) |                                         |    |                          |                     |
|                        |       |                  | Other              | Clock drawing                                  |                      | Poor performance (score <sub>≥</sub> 3) | OR | Per 10 µg/m <sup>3</sup> | 1 (0.94, 1.07)      |
| Chen 2009 (NHANES III) | 1,677 | Ozone            | Memory             | Serial-digit learning test-trials to criterion | -0.10 (-0.18, -0.02) |                                         |    |                          |                     |
|                        | 1,677 |                  | Memory             | Serial-Digit Learning Test total score         | -0.10 (-0.18, -0.03) |                                         |    |                          |                     |
|                        | 1,756 |                  | Other              | Simple reaction time test                      | 0.00 (-0.09, 0.09)   |                                         |    |                          |                     |
|                        | 1,724 |                  | Executive function | Symbol digit substitution test                 | -0.12 (-0.19, -0.04) |                                         |    |                          |                     |
| Shin 2019 (KFACS)      | 2,896 | Ozone            | Global             | MMSE-KC                                        |                      | Log(test score) Difference              |    | Per 10 ppb               | 0.10 (0.06, 0.14)   |
|                        |       |                  | Memory             | Digit forward span                             |                      | Log(test score) Difference              |    | Per 10 ppb               | 0.14 (0.07, 0.22)   |
|                        |       |                  | Memory             | Digit backward span                            |                      | Log(test score) Difference              |    | Per 10 ppb               | -0.07 (-0.15, 0.01) |
|                        |       |                  | Memory             | Word list memory                               |                      | Log(test score) Difference              |    | Per 10 ppb               | 0.02 (-0.07, 0.11)  |
|                        |       |                  | Memory             | Word list recall                               |                      | Log(test score) Difference              |    | Per 10 ppb               | 0.08 (0.04, 0.11)   |
|                        |       |                  | Memory             | Recall storage                                 |                      | Log(test score) Difference              |    | Per 10 ppb               | 0.03 (0.00, 0.06)   |
|                        |       |                  | Memory             | Word list recognition                          |                      | Log(test score) Difference              |    | Per 10 ppb               | 0.02 (0.00, 0.05)   |
|                        |       |                  | Executive function | FAB score                                      |                      | Log(test score) Difference              |    | Per 10 ppb               | 0.03 (0.00, 0.04)   |
| Chen 2009 (NHANES III) | 1,677 | PM <sub>10</sub> | Memory             | Serial-digit learning test-trials to criterion | 0.01 (-0.03, 0.04)   |                                         |    |                          |                     |
|                        | 1,677 |                  | Memory             | Serial-digit learning test total score         | -0.02 (-0.06, 0.01)  |                                         |    |                          |                     |
|                        | 1,756 |                  | Other              | Simple reaction time test                      | 0.01 (-0.03, 0.05)   |                                         |    |                          |                     |
|                        | 1,724 |                  | Executive function | Symbol digit substitution test                 | 0 (-0.04, 0.03)      |                                         |    |                          |                     |
| Crous-Bou 2020 (ALFA)  | 958   | PM <sub>10</sub> | Global             | Modified-PACC composite                        | 2.05 (-3.58, 7.69)   |                                         |    |                          |                     |
|                        |       |                  | Memory             | Memory binding test                            | 5.45 (-0.34, 11.25)  |                                         |    |                          |                     |
|                        |       |                  | Executive function | WAIS-IV subtests                               | -0.79 (-5.77, 4.18)  |                                         |    |                          |                     |

|                              |       |                  |                    |                                                                                                                                                                 |                      |                            |                          |                     |
|------------------------------|-------|------------------|--------------------|-----------------------------------------------------------------------------------------------------------------------------------------------------------------|----------------------|----------------------------|--------------------------|---------------------|
| Kulick 2020<br>(NOMAS)       | 1,093 | PM <sub>10</sub> | Global             | Global cognitive score                                                                                                                                          | 0.00 (-0.10, 0.11)   |                            |                          |                     |
|                              |       |                  | Memory             | Modified California Verbal Learning Test                                                                                                                        | 0.05 (-0.13, 0.22)   |                            |                          |                     |
|                              |       |                  | Executive function | (Color Trails 2-Color Trails 1), Controlled Oral Word Association Test, Odd Man Out, Digit Reordering                                                           | -0.02 (-0.20, 0.15)  |                            |                          |                     |
|                              |       |                  | Executive function | Boston Naming Test (15-item), Animal Naming, Color Trails 2, Color Trails 1, Grooved Pegboard, Letter-Number Sequencing, Symbol Digit Modalities                | 0.12 (-0.05, 0.29)   |                            |                          |                     |
| Kulick 2020<br>(WHICAP)      | 5,330 | PM <sub>10</sub> | Global             | Global cognitive score                                                                                                                                          | -0.06 (-0.11, 0.00)  |                            |                          |                     |
|                              |       |                  | Memory             | Selective reminding test                                                                                                                                        | -0.09 (-0.15, -0.03) |                            |                          |                     |
|                              |       |                  | Executive function | (Color Trails 2-Color Trails 1), Controlled Oral Word Association Test, Identities and Oddities; similarities subset from the Wechsler Adult Intelligence Scale | -0.04 (-0.09, 0.02)  |                            |                          |                     |
|                              |       |                  | Executive function | Boston Naming Test (15-item), Animal Naming, Comprehension subtest from the Boston Diagnostic Aphasia Exam, Color Trails 2, Color Trails 1                      | -0.11 (-0.17, -0.06) |                            |                          |                     |
| Nußbaum 2020<br>(1000BRAINS) | 615   | PM <sub>10</sub> | Memory             | Benton figural memory test; Verbaler Gedächtnistest (VGT) verbal learning test; VGT delayed                                                                     |                      | Test score rank Difference | Per 10 µg/m <sup>3</sup> | 0 (-0.20, 0.20)     |
|                              |       |                  | Memory             | Visual-Pattern-test; Block-tapping test (BTT) forwards; BTT backwards; Zahlennachsprechen (ZNS) verbal memory test forwards; ZNS backwards                      |                      | Test score rank Difference | Per 10 µg/m <sup>3</sup> | 0 (-0.15, 0.20)     |
|                              |       |                  | Executive function | Subtest 3 of "Leistungsprüfungssystem 50+", problem solving test; Fünf-Punkte figural fluency test; Trail making test B-A; Color-Word Interference Test         |                      | Test score rank Difference | Per 10 µg/m <sup>3</sup> | 0.05 (-0.15, 0.25)  |
|                              |       |                  | Executive function | Regensburger Wortflüssigkeitstest phonemic fluency and semantic fluency tests; Wortschatztest vocabulary test                                                   |                      | Test score rank Difference | Per 10 µg/m <sup>3</sup> | 0 (-0.20, 0.20)     |
|                              |       |                  | Executive function | Alters-Konzentrations selective attention test; Trail Making test (part A)                                                                                      |                      | Test score rank Difference | Per 10 µg/m <sup>3</sup> | -0.05 (-0.25, 0.20) |

|                            |       |                  |                    |                       |                      |                            |                          |                      |
|----------------------------|-------|------------------|--------------------|-----------------------|----------------------|----------------------------|--------------------------|----------------------|
| Ranft 2009<br>(SALIA)      | 396   | PM <sub>10</sub> | Global             | CERAD-plus test       | -0.60 (-1.40, 0.20)  |                            |                          |                      |
|                            | 308   |                  | Executive function | Stroop test           |                      | Log(test score) Difference | Per 10 µg/m <sup>3</sup> | 0 (-4.00, 4.00)      |
|                            | 377   |                  | Other              | Sniffing test         | 0 (-0.38, 0.38)      |                            |                          |                      |
| Schikowski 2015<br>(SALIA) | 789   | PM <sub>10</sub> | Global             | MMSE                  | 0.26 (-0.22, 0.75)   |                            |                          |                      |
|                            |       |                  | Global             | CERaD total score     | 0.15 (-0.32, 0.63)   |                            |                          |                      |
|                            |       |                  | Memory             | Word list learning    | 0.44 (-0.04, 0.92)   |                            |                          |                      |
|                            |       |                  | Memory             | Word list recall      | 0.25 (-0.20, 0.74)   |                            |                          |                      |
|                            |       |                  | Memory             | Figure recall         | 0.08 (-0.42, 0.55)   |                            |                          |                      |
|                            |       |                  | Memory             | Boston naming test    | -0.20 (-0.68, 0.28)  |                            |                          |                      |
|                            |       |                  | Executive function | Semantic fluency      | 0.10 (-0.35, 0.61)   |                            |                          |                      |
|                            |       |                  | Executive function | Phonemic fluency      | 0.04 (-0.41, 0.54)   |                            |                          |                      |
|                            |       |                  | Executive function | Trail making A        | 0 (-0.47, 0.47)      |                            |                          |                      |
|                            |       |                  | Executive function | Trail making B        | 0.05 (-0.41, 0.51)   |                            |                          |                      |
|                            |       |                  | Executive function | Trail making B/A      | 0.05 (-0.41, 0.51)   |                            |                          |                      |
|                            |       |                  | Other              | Figure copying        | -0.52 (-1.00, -0.03) |                            |                          |                      |
| Shin 2019 (KFACS)          | 2,896 | PM <sub>10</sub> | Global             | MMSE-KC               |                      | Log(test score) Difference | Per 10 µg/m <sup>3</sup> | -0.08 (-0.11, -0.04) |
|                            |       |                  | Memory             | Digit forward span    |                      | Log(test score) Difference | Per 10 µg/m <sup>3</sup> | -0.06 (-0.12, 0.00)  |
|                            |       |                  | Memory             | Digit backward span   |                      | Log(test score) Difference | Per 10 µg/m <sup>3</sup> | 0.05 (-0.02, 0.12)   |
|                            |       |                  | Memory             | Word list memory      |                      | Log(test score) Difference | Per 10 µg/m <sup>3</sup> | 0.11 (0.03, 0.18)    |
|                            |       |                  | Memory             | Word list recall      |                      | Log(test score) Difference | Per 10 µg/m <sup>3</sup> | -0.02 (-0.07, 0.02)  |
|                            |       |                  | Memory             | Recall storage        |                      | Log(test score) Difference | Per 10 µg/m <sup>3</sup> | -0.03 (-0.07, 0.01)  |
|                            |       |                  | Memory             | Word list recognition |                      | Log(test score) Difference | Per 10 µg/m <sup>3</sup> | 0.00 (-0.03, 0.03)   |
|                            |       |                  | Executive function | FAB score             |                      | Log(test score) Difference | Per 10 µg/m <sup>3</sup> | 0.00 (-0.05, 0.04)   |

|                                           |        |                   |                    |                                                                        |                      |                                         |                                                 |                          |                   |
|-------------------------------------------|--------|-------------------|--------------------|------------------------------------------------------------------------|----------------------|-----------------------------------------|-------------------------------------------------|--------------------------|-------------------|
| Tonne 2014<br>(Whitehall II)              | 2,762  | PM <sub>10</sub>  | Memory             | 20 word free recall list                                               | -0.22 (-0.50, 0.05)  |                                         |                                                 |                          |                   |
|                                           | 2,761  |                   | Executive function | Semantic fluency                                                       | 0.06 (-0.19, 0.30)   |                                         |                                                 |                          |                   |
|                                           | 2,749  |                   | Executive function | Phonemic fluency                                                       | 0.10 (-0.19, 0.39)   |                                         |                                                 |                          |                   |
|                                           | 2,767  |                   | Executive function | Alice Heim 4-I test                                                    | -0.22 (-0.43, -0.01) |                                         |                                                 |                          |                   |
| Tzivian 2016<br>(Heinz Nixdorf<br>RECALL) | 4,050  | PM <sub>10</sub>  | Global             | Global cognitive score                                                 | -0.14 (-0.25, -0.04) |                                         |                                                 |                          |                   |
|                                           |        |                   | Memory             | 8 word immediate recall                                                | -0.10 (-0.24, 0.05)  |                                         |                                                 |                          |                   |
|                                           |        |                   | Memory             | 8 word delayed recall                                                  | -0.14 (-0.29, 0.05)  |                                         |                                                 |                          |                   |
|                                           |        |                   | Executive function | Semantic fluency                                                       | -0.14 (-0.33, 0.05)  |                                         |                                                 |                          |                   |
|                                           |        |                   | Executive function | Labyrinth test                                                         | -0.24 (-0.43, -0.10) |                                         |                                                 |                          |                   |
|                                           |        |                   | Other              | Clock drawing                                                          |                      | Poor performance (score <sub>≥</sub> 3) | OR                                              | Per 10 µg/m <sup>3</sup> | 0.95 (0.60, 1.45) |
| Ailshire 2014<br>(HRS) <sup>d</sup>       | 13,996 | PM <sub>2.5</sub> | Global             | TICS (out of 35 points)                                                | Test score           | Difference                              | Quartile 1 (4.5 - 9.942 µg/m <sup>3</sup> )     | 0 (reference)            |                   |
|                                           |        |                   |                    |                                                                        |                      |                                         | Quartile 2 (9.943 - 12.184 µg/m <sup>3</sup> )  | -0.02 (-0.07, 0.02)      |                   |
|                                           |        |                   |                    |                                                                        |                      |                                         | Quartile 3 (12.185 - 13.796 µg/m <sup>3</sup> ) | -0.09 (-0.14, -0.05)     |                   |
|                                           |        |                   |                    |                                                                        |                      |                                         | Quartile 4 (13.797 - 20.661 µg/m <sup>3</sup> ) | -0.06 (-0.10, -0.01)     |                   |
|                                           |        |                   | Memory             | Episodic memory - sum of immediate and delayed recall scores from TICS | Test score           | Difference                              | Quartile 1 (4.5 - 9.942 µg/m <sup>3</sup> )     | 0 (reference)            |                   |
|                                           |        |                   |                    |                                                                        |                      |                                         | Quartile 2 (9.943 - 12.184 µg/m <sup>3</sup> )  | -0.03 (-0.08, 0.01)      |                   |



| Study                 | N     | PM <sub>2.5</sub> | Global             | Mental status - sum of the rest of the scores from the TICS                                                                                      | Test score | Difference | Quartile 3                                                          |
|-----------------------|-------|-------------------|--------------------|--------------------------------------------------------------------------------------------------------------------------------------------------|------------|------------|---------------------------------------------------------------------|
|                       |       |                   |                    |                                                                                                                                                  |            |            | (12.185 - 13.796 μg/m <sup>3</sup> )                                |
|                       |       |                   |                    |                                                                                                                                                  |            |            | -0.10 (-0.15, -0.06)                                                |
|                       |       |                   |                    |                                                                                                                                                  |            |            | Quartile 4 (13.797 - 20.661 μg/m <sup>3</sup> ) -0.05 (-0.10, 0.00) |
|                       |       |                   |                    |                                                                                                                                                  |            |            | Quartile 1 (4.5 - 9.942 μg/m <sup>3</sup> ) 0 (reference)           |
|                       |       |                   |                    |                                                                                                                                                  |            |            | Quartile 2 (9.943 - 12.184 μg/m <sup>3</sup> ) 0.01 (-0.04, 0.05)   |
|                       |       |                   |                    |                                                                                                                                                  |            |            | Quartile 3 (12.185 - 13.796 μg/m <sup>3</sup> ) -0.05 (-0.09, 0.01) |
|                       |       |                   |                    |                                                                                                                                                  |            |            | Quartile 4 (13.797 - 20.661 μg/m <sup>3</sup> ) -0.05 (-0.10, 0.00) |
| Crous-Bou 2020 (ALFA) | 958   | PM <sub>2.5</sub> | Global             | Modified-PACC composite                                                                                                                          | 1.23       |            |                                                                     |
|                       |       |                   | Memory             | Memory binding test                                                                                                                              | 3.18       |            |                                                                     |
|                       |       |                   | Executive function | WAIS-IV subtests                                                                                                                                 | -0.63      |            |                                                                     |
| Kulick 2020 (NOMAS)   | 1,093 | PM <sub>2.5</sub> | Global             | Global cognitive score                                                                                                                           | 0.34       |            |                                                                     |
|                       |       |                   | Memory             | Modified California Verbal Learning Test                                                                                                         | 0.32       |            |                                                                     |
|                       |       |                   | Executive function | (Color Trails 2-Color Trails 1), Controlled Oral Word Association Test, Odd Man Out, Digit Reordering                                            | 0.18       |            |                                                                     |
|                       |       |                   | Executive function | Boston Naming Test (15-item), Animal Naming, Color Trails 2, Color Trails 1, Grooved Pegboard, Letter-Number Sequencing, Symbol Digit Modalities | 0.84       |            |                                                                     |
| Kulick 2020 (WHICAP)  | 5,330 | PM <sub>2.5</sub> | Global             | Global cognitive score                                                                                                                           | -0.23      |            |                                                                     |
|                       |       |                   | Memory             | Selective reminding test                                                                                                                         | -0.21      |            |                                                                     |

|                                       |       |                   |                    |                                                                                                                                                                 |                      |                               |                          |                     |
|---------------------------------------|-------|-------------------|--------------------|-----------------------------------------------------------------------------------------------------------------------------------------------------------------|----------------------|-------------------------------|--------------------------|---------------------|
|                                       |       |                   | Executive function | (Color Trails 2-Color Trails 1), Controlled Oral Word Association Test, Identities and Oddities; similarities subset from the Wechsler Adult Intelligence Scale | -0.21 (-0.38, -0.03) |                               |                          |                     |
|                                       |       |                   | Executive function | Boston Naming Test (15-item), Animal Naming, Comprehension subtest from the Boston Diagnostic Aphasia Exam, Color Trails 2, Color Trails 1                      | -0.22 (-0.41, -0.03) |                               |                          |                     |
| Nußbaum 2020 (1000BRAINS)             | 615   | PM <sub>2.5</sub> | Memory             | Benton figural memory test; Verbaler Gedächtnistest (VGT) verbal learning test; VGT delayed                                                                     |                      | Test score rank Difference    | Per 10 µg/m <sup>3</sup> | -0.07 (-0.43, 0.29) |
|                                       |       |                   | Memory             | Visual-Pattern-test; Block-tapping test (BTT) forwards; BTT backwards; Zahlennachsprechen (ZNS) verbal memory test forwards; ZNS backwards                      |                      | Test score rank Difference    | Per 10 µg/m <sup>3</sup> | 0.07 (-0.21, 0.36)  |
|                                       |       |                   | Executive function | Subtest 3 of "Leistungsprüfungssystem 50+", problem solving test; Fünf-Punkte figural fluency test; Trail making test B-A; Color-Word Interference Test         |                      | Test score rank Difference    | Per 10 µg/m <sup>3</sup> | 0.07 (-0.21, 0.36)  |
|                                       |       |                   | Executive function | Regensburger Wortflüssigkeitstest phonemic fluency and semantic fluency tests; Wortschatztest vocabulary test                                                   |                      | Test score rank Difference    | Per 10 µg/m <sup>3</sup> | -0.14 (-0.50, 0.21) |
|                                       |       |                   | Executive function | Alters-Konzentrations selective attention test; Trail Making test (part A)                                                                                      |                      | Test score rank Difference    | Per 10 µg/m <sup>3</sup> | -0.14 (-0.57, 0.21) |
| Salinas-Rodriguez 2018 (ENSANUT-2012) | 7,986 | PM <sub>2.5</sub> | Memory             | 3 word memory test                                                                                                                                              |                      | Recalled none OR of the words | Per 10 µg/m <sup>3</sup> | 1.30 (1.03, 1.65)   |
|                                       |       |                   | Executive function | Semantic fluency                                                                                                                                                | -0.11 (-0.22, -0.06) |                               |                          |                     |
| Schikowski 2015 (SALIA)               | 789   | PM <sub>2.5</sub> | Global             | MMSE                                                                                                                                                            | 0.30 (-0.43, 1.08)   |                               |                          |                     |
|                                       |       |                   | Global             | CERaD total score                                                                                                                                               | 0.17 (-0.60, 0.94)   |                               |                          |                     |
|                                       |       |                   | Memory             | Word list learning                                                                                                                                              | 0.51 (-0.28, 1.25)   |                               |                          |                     |
|                                       |       |                   | Memory             | Word list recall                                                                                                                                                | 0.47 (-0.33, 1.23)   |                               |                          |                     |
|                                       |       |                   | Memory             | Figure recall                                                                                                                                                   | 0.29 (-0.49, 1.07)   |                               |                          |                     |

|                           |       |                   |                    |                          |                      |                            |                          |                      |
|---------------------------|-------|-------------------|--------------------|--------------------------|----------------------|----------------------------|--------------------------|----------------------|
|                           |       |                   | Memory             | Boston naming test       | -0.42 (-1.21, 0.33)  |                            |                          |                      |
|                           |       |                   | Executive function | Semantic fluency         | 0.41 (-0.35, 1.17)   |                            |                          |                      |
|                           |       |                   | Executive function | Phonemic fluency         | 0.29 (-0.48, 1.05)   |                            |                          |                      |
|                           |       |                   | Executive function | Trail making A           | -0.27 (-1.03, 0.49)  |                            |                          |                      |
|                           |       |                   | Executive function | Trail making B           | -0.11 (-0.85, 0.64)  |                            |                          |                      |
|                           |       |                   | Executive function | Trail making B/A         | 0.16 (-0.58, 0.90)   |                            |                          |                      |
|                           |       |                   | Other              | Figure copying           | -0.76 (-1.52, 0.04)  |                            |                          |                      |
| Shin 2019 (KFACS)         | 2,896 | PM <sub>2.5</sub> | Global             | MMSE-KC                  |                      | Log(test score) Difference | Per 10 µg/m <sup>3</sup> | -0.07 (-0.13, -0.01) |
|                           |       |                   | Memory             | Digit forward span       |                      | Log(test score) Difference | Per 10 µg/m <sup>3</sup> | -0.15 (-0.27, -0.03) |
|                           |       |                   | Memory             | Digit backward span      |                      | Log(test score) Difference | Per 10 µg/m <sup>3</sup> | -0.26 (-0.38, -0.13) |
|                           |       |                   | Memory             | Word list memory         |                      | Log(test score) Difference | Per 10 µg/m <sup>3</sup> | -0.16 (-0.24, -0.07) |
|                           |       |                   | Memory             | Word list recall         |                      | Log(test score) Difference | Per 10 µg/m <sup>3</sup> | -0.24 (-0.36, -0.12) |
|                           |       |                   | Memory             | Recall storage           |                      | Log(test score) Difference | Per 10 µg/m <sup>3</sup> | -0.16 (-0.25, -0.07) |
|                           |       |                   | Memory             | Word list recognition    |                      | Log(test score) Difference | Per 10 µg/m <sup>3</sup> | -0.11 (-0.19, -0.02) |
|                           |       |                   | Executive function | FAB score                |                      | Log(test score) Difference | Per 10 µg/m <sup>3</sup> | -0.25 (-0.32, -0.17) |
| Tallon 2017 (NSHAP)       | 3,374 | PM <sub>2.5</sub> | Global             | Modified MoCA            | -0.14 (-0.25, -0.03) |                            |                          |                      |
| Tonne 2014 (Whitehall II) | 2,762 | PM <sub>2.5</sub> | Memory             | 20 word free recall list | 0.10 (-0.31, 0.52)   |                            |                          |                      |
|                           | 2,761 |                   | Executive function | Semantic fluency         | -0.38 (-0.88, 0.12)  |                            |                          |                      |
|                           | 2,749 |                   | Executive function | Phonemic fluency         | 0.16 (-0.34, 0.67)   |                            |                          |                      |
|                           | 2,767 |                   | Executive function | Alice Heim 4-I test      | -0.41 (-0.78, -0.04) |                            |                          |                      |

|                                           |       |                      |                    |                                                                                     |                      |                                         |    |                          |                   |
|-------------------------------------------|-------|----------------------|--------------------|-------------------------------------------------------------------------------------|----------------------|-----------------------------------------|----|--------------------------|-------------------|
| Tzivian 2016<br>(Heinz Nixdorf<br>RECALL) | 4,050 | PM <sub>2.5</sub>    | Global             | Global cognitive score                                                              | -0.39 (-0.58, -0.21) |                                         |    |                          |                   |
|                                           |       |                      | Memory             | 8 word immediate recall                                                             | -0.35 (-0.63, -0.07) |                                         |    |                          |                   |
|                                           |       |                      | Memory             | 8 word delayed recall                                                               | -0.42 (-0.69, -0.07) |                                         |    |                          |                   |
|                                           |       |                      | Executive function | Semantic fluency                                                                    | -0.49 (-0.76, -0.21) |                                         |    |                          |                   |
|                                           |       |                      | Executive function | Labyrinth test                                                                      | -0.63 (-0.90, -0.28) |                                         |    |                          |                   |
|                                           |       |                      | Other              | Clock drawing                                                                       |                      | Poor performance (score <sub>≥</sub> 3) | OR | Per 10 µg/m <sup>3</sup> | 0.70 (0.35, 1.50) |
| Younan 2020-<br>BRAIN (WHIMS-<br>MRI)     | 531   | PM <sub>2.5</sub>    | Memory             | CVLT: Immediate recall of List A trials 1-3                                         | 0.01 (-0.19, 0.20)   |                                         |    |                          |                   |
|                                           |       |                      | Memory             | CVLT: Immediate recall of List B                                                    | 0.15 (-0.01, 0.30)   |                                         |    |                          |                   |
|                                           |       |                      | Memory             | CVLT: Short-delay recall of List A                                                  | -0.06 (-0.25, 0.14)  |                                         |    |                          |                   |
|                                           |       |                      | Memory             | CVLT: Long-delay recall of List A                                                   | -0.09 (-0.28, 0.10)  |                                         |    |                          |                   |
|                                           |       |                      | Memory             | CVLT: Composite score of episodic memory, based on the 3 List A (not List B) scores | -0.06 (-0.25, 0.13)  |                                         |    |                          |                   |
| Crous-Bou 2020<br>(ALFA)                  | 958   | PM <sub>2.5-10</sub> | Global             | Modified-PACC composite                                                             | 0.68 (-2.54, 3.91)   |                                         |    |                          |                   |
|                                           |       |                      | Memory             | Memory binding test                                                                 | 0.80 (-2.55, 4.14)   |                                         |    |                          |                   |
|                                           |       |                      | Executive function | WAIS-IV subtests                                                                    | 0.16 (-2.64, 2.96)   |                                         |    |                          |                   |
| Tzivian 2016<br>(Heinz Nixdorf<br>RECALL) | 4,050 | PM <sub>2.5-10</sub> | Global             | Global cognitive score                                                              | -0.23 (-0.36, -0.11) |                                         |    |                          |                   |
|                                           |       |                      | Memory             | 8 word immediate recall                                                             | -0.22 (-0.43, -0.05) |                                         |    |                          |                   |
|                                           |       |                      | Memory             | 8 word delayed recall                                                               | -0.22 (-0.43, -0.05) |                                         |    |                          |                   |
|                                           |       |                      | Executive function | Semantic fluency                                                                    | -0.38 (-0.60, -0.16) |                                         |    |                          |                   |
|                                           |       |                      | Executive function | Labyrinth test                                                                      | -0.27 (-0.49, -0.05) |                                         |    |                          |                   |
|                                           |       |                      | Other              | Clock drawing                                                                       |                      | Poor performance (score <sub>≥</sub> 3) | OR | Per 10 µg/m <sup>3</sup> | 0.85 (0.50, 1.44) |

---

Abbreviations: 1000BRAINS: Cohort study of the 1000Brains population; ALFA: Alzheimer's and Families; BTT: Block-Tapping Test; CERaD: Consortium to Establish a Registry for Alzheimer's Disease; CI: Confidence Interval; CVLT: California Verbal Learning Test; ENSANUT: National Survey on Health and Nutrition; FAB Score: Frontal Assessment Battery Score; HRS: Health and Retirement Study; KFACS: Korean Frailty and Aging Cohort Study; MMSE :Mini-Mental State Examination; MMSE-KC: Mini-Mental State Examination Korean Consortium; MoCA: Montreal Cognitive Assessment; mPACC: Modified Preclinical Alzheimer Cognitive Composite; MRI :Magnetic Resonance Imaging; N: Sample Size; NHANES III: Third National Health and Nutrition Examination Survey; NO: Nitrogen Oxide; NO<sub>2</sub>: Nitrogen dioxide; NOMAS: Northern Manhattan Study; NO<sub>x</sub>: Oxides of Nitrogen; NSHAP :The National Social Life, Health, and Aging Project; OR: Odds Ratio; PACC: Preclinical Alzheimer Cognitive Composite; PM<sub>10</sub>: Inhalable particles with diameters that are 10 µm in diameter or smaller; PM<sub>2.5</sub>: fine particulate matter less than 2.5 µm in diameter; PM<sub>2.5-10</sub>: Particulate matter with diameter between 2.5 and 10 microns; ppb: Parts per billion; SALIA: Study on the Influence of Air Pollution on Lung Function, Inflammation, and Aging; SD: Standard Deviation; TICS: Telephone Interview of Cognitive Status; VGT: Verbaler Gedächtnistest; WAIS-IV: Wechsler Adult Intelligence Scale-Fourth Edition; WHICAP: The Washington Heights-Inwood Community Aging Project; WHIMS-MRI: Women's Health Initiative Magnetic Resonance Imaging; ZNS: Zahlennachsprechen.

- a) Only effect estimates reporting an association between air pollutants and cognitive level from studies that had 3 or more strengths according to our bias assessment are included in this table. If a study reported the standard deviation of the test used or used a test z-score, we transformed associations to represent SD-unit differences in test scores per common exposure contrast (10 µg/m<sup>3</sup> for PM<sub>2.5</sub>, PM<sub>10</sub>, PM<sub>2.5-10</sub>, NO<sub>2</sub>, and NO<sub>x</sub>; and 10 ppb for ozone). If transformation to SD units of test scores was not possible, associations were still scaled to common exposure contrasts where possible. If neither was possible, we reported the associations as presented in their studies. If multiple associations between the same exposure and outcome were published, we reported those associations that used a continuous exposure contrast and did not adjust for potential intermediates.
- b) Excluded from this table was the study by Zeng et al. (2010). Although otherwise eligible, the exposure contrast for the reported effect estimates was not reported, and we were unable to obtain this information from the authors by the time of submission.
- c) We transformed effect estimates to represent SD-unit differences in test scores per 10 µg/m<sup>3</sup> for PM<sub>2.5</sub>, PM<sub>10</sub>, PM<sub>2.5-10</sub>, NO<sub>2</sub>, and NO<sub>x</sub>; and 10 ppb for ozone.
- d) We standardized effect estimates reported by Ailshire et al. (2014) to reflect SD-unit change in cognitive test score per quartile of PM<sub>2.5</sub> exposure.

**Table S2: Associations between air pollution exposure and cognitive change in qualifying studies <sup>a</sup>**

| Paper                    | N     | Exposure         | Cognitive domain   | Test(s)                                                                                                                                                         | Difference in biannual rate of change, per 10 µg/m <sup>3</sup> |
|--------------------------|-------|------------------|--------------------|-----------------------------------------------------------------------------------------------------------------------------------------------------------------|-----------------------------------------------------------------|
|                          |       |                  |                    |                                                                                                                                                                 | Difference (95% CI)                                             |
| Kulick 2020 (NOMAS)      | 1,093 | NO <sub>2</sub>  | Global             | Global cognitive score                                                                                                                                          | 0.00 (-0.03, 0.02)                                              |
|                          |       |                  | Memory             | Modified California Verbal Learning Test                                                                                                                        | -0.02 (-0.06, 0.02)                                             |
|                          |       |                  | Executive function | (Color Trails 2-Color Trails 1), Controlled Oral Word Association Test, Odd Man Out, Digit Reordering                                                           | 0.01 (-0.03, 0.05)                                              |
|                          |       |                  | Executive function | Boston Naming Test (15-item), Animal Naming, Color Trails 2, Color Trails 1, Grooved Pegboard, Letter-Number Sequencing, Symbol Digit Modalities                | -0.02 (-0.06, 0.02)                                             |
| Kulick 2020 (WHICAP)     | 5,330 | NO <sub>2</sub>  | Global             | Global cognitive score                                                                                                                                          | -0.03 (-0.04, -0.02)                                            |
|                          |       |                  | Memory             | Selective reminding test                                                                                                                                        | -0.01 (-0.02, 0.00)                                             |
|                          |       |                  | Executive function | (Color Trails 2-Color Trails 1), Controlled Oral Word Association Test, Identities and Oddities; similarities subset from the Wechsler Adult Intelligence Scale | 0.00 (-0.01, 0.01)                                              |
|                          |       |                  | Executive function | Boston Naming Test (15-item), Animal Naming, Comprehension subtest from the Boston Diagnostic Aphasia Exam, Color Trails 2, Color Trails 1                      | -0.01 (-0.02, 0.00)                                             |
| Petkus 2021 (WHIMS-ECHO) | 1,583 | NO <sub>2</sub>  | Memory             | East Boston Memory Test (EBMT)21 and word-list items of the Telephone Interview for Cognitive Status-modified (TICS <sub>m</sub> )                              | -0.02 (-0.05, 0.01)                                             |
| Oudin 2017 (Betula)      | 1,469 | NO <sub>x</sub>  | Memory             | Episodic memory measure: immediate free recall and delayed cued recall                                                                                          | 0.00 (-0.01, 0.01)                                              |
| Kulick 2020 (NOMAS)      | 1,093 | PM <sub>10</sub> | Global             | Global cognitive score                                                                                                                                          | -0.01 (-0.04, 0.02)                                             |
|                          |       |                  | Memory             | Modified California Verbal Learning Test                                                                                                                        | -0.03 (-0.08, 0.02)                                             |
|                          |       |                  | Executive function | (Color Trails 2-Color Trails 1), Controlled Oral Word Association Test, Odd Man Out, Digit Reordering                                                           | 0.00 (-0.05, 0.05)                                              |
|                          |       |                  | Executive function | Boston Naming Test (15-item), Animal Naming, Color Trails 2, Color Trails 1, Grooved Pegboard, Letter-Number Sequencing, Symbol Digit Modalities                | -0.04 (-0.09, 0.01)                                             |
| Kulick 2020 (WHICAP)     | 5,330 | PM <sub>10</sub> | Global             | Global cognitive score                                                                                                                                          | -0.03 (-0.05, -0.01)                                            |
|                          |       |                  | Memory             | Selective reminding test                                                                                                                                        | -0.01 (-0.03, 0.01)                                             |

|                           |        |                   |                    |                                                                                                                                                                 |                      |
|---------------------------|--------|-------------------|--------------------|-----------------------------------------------------------------------------------------------------------------------------------------------------------------|----------------------|
|                           |        |                   | Executive function | (Color Trails 2-Color Trails 1), Controlled Oral Word Association Test, Identities and Oddities; similarities subset from the Wechsler Adult Intelligence Scale | 0.01 (-0.01, 0.03)   |
|                           |        |                   | Executive function | Boston Naming Test (15-item), Animal Naming, Comprehension subtest from the Boston Diagnostic Aphasia Exam, Color Trails 2, Color Trails 1                      | 0.00 (-0.02, 0.02)   |
| Tonne 2014 (Whitehall II) | 2,867  | PM <sub>10</sub>  | Memory             | 20 word free recall list                                                                                                                                        | -0.06 (-0.14, 0.02)  |
|                           |        |                   | Executive function | Semantic fluency                                                                                                                                                | -0.02 (-0.08, 0.04)  |
|                           |        |                   | Executive function | Phonemic fluency                                                                                                                                                | -0.02 (-0.08, 0.04)  |
|                           |        |                   | Executive function | Alice Heim 4-I test                                                                                                                                             | -0.02 (-0.06, 0.01)  |
| Weuve 2012 (NHS)          | 16,887 | PM <sub>10</sub>  | Global             | Global cognitive score                                                                                                                                          | -0.02 (-0.01, -0.01) |
|                           | 19,409 |                   | Global             | TICS                                                                                                                                                            | -0.02 (-0.03, 0.00)  |
|                           | 16,906 |                   | Memory             | Composite of immediate/delayed recall from EBMT and TICS 10-word list                                                                                           | -0.02 (-0.03, -0.01) |
|                           | 18,652 |                   | Executive function | Semantic fluency                                                                                                                                                | -0.01 (-0.03, 0.00)  |
|                           | 16,916 |                   | Executive function | Digit span backward                                                                                                                                             | -0.02 (-0.04, -0.01) |
| Kulick 2020 (NOMAS)       | 1,093  | PM <sub>2.5</sub> | Global             | Global cognitive score                                                                                                                                          | -0.04 (-0.19, 0.10)  |
|                           |        |                   | Memory             | Modified California Verbal Learning Test                                                                                                                        | -0.13 (-0.37, 0.11)  |
|                           |        |                   | Executive function | (Color Trails 2-Color Trails 1), Controlled Oral Word Association Test, Odd Man Out, Digit Reordering                                                           | 0.01 (-0.22, 0.25)   |
|                           |        |                   | Executive function | Boston Naming Test (15-item), Animal Naming, Color Trails 2, Color Trails 1, Grooved Pegboard, Letter-Number Sequencing, Symbol Digit Modalities                | -0.12 (-0.36, 0.12)  |
| Kulick 2020 (WHICAP)      | 5,330  | PM <sub>2.5</sub> | Global             | Global cognitive score                                                                                                                                          | -0.14 (-0.18, -0.10) |
|                           |        |                   | Memory             | Selective reminding test                                                                                                                                        | -0.08 (-0.28, -0.06) |
|                           |        |                   | Executive function | (Color Trails 2-Color Trails 1), Controlled Oral Word Association Test, Identities and Oddities; similarities subset from the Wechsler Adult Intelligence Scale | -0.03 (-0.07, -0.01) |
|                           |        |                   | Executive function | Boston Naming Test (15-item), Animal Naming, Comprehension subtest from the Boston Diagnostic Aphasia Exam, Color Trails 2, Color Trails 1                      | -0.08 (-0.12, -0.04) |
| Petkus 2020 (WHISCA)      | 2,202  | PM <sub>2.5</sub> | Memory             | California Verbal Learning Test trials 1-3                                                                                                                      | -0.73 (-1.04, -0.42) |
|                           |        |                   | Memory             | Short delay free recall                                                                                                                                         | -0.71 (-1.05, -0.36) |
|                           |        |                   | Memory             | Long delay free recall                                                                                                                                          | -0.55 (-0.89, -0.21) |

|                           |        |                      |                    |                                                                                                                       |                      |
|---------------------------|--------|----------------------|--------------------|-----------------------------------------------------------------------------------------------------------------------|----------------------|
| Petkus 2021 (WHIMS-ECHO)  | 1,583  | PM <sub>2.5</sub>    | Memory             | East Boston Memory Test (EBMT)21 and word-list items of the Telephone Interview for Cognitive Status-modified (TICSm) | -0.05 (-0.16, 0.05)  |
| Tonne 2014 (Whitehall II) | 2,867  | PM <sub>2.5</sub>    | Memory             | 20 word free recall list                                                                                              | -0.11 (-0.23, 0.01)  |
|                           |        |                      | Executive function | Semantic fluency                                                                                                      | -0.04 (-0.13, 0.04)  |
|                           |        |                      | Executive function | Phonemic fluency                                                                                                      | -0.03 (-0.12, 0.05)  |
|                           |        |                      | Executive function | Alice Heim 4-I test                                                                                                   | -0.04 (-0.09, 0.01)  |
| Weuve 2012 (NHS)          | 16,887 | PM <sub>2.5</sub>    | Global             | Global cognitive score                                                                                                | -0.02 (-0.04, 0.00)  |
|                           | 19,409 |                      | Global             | TICS                                                                                                                  | -0.05 (-0.09, -0.01) |
|                           | 16,906 |                      | Memory             | Composite of immediate/delayed recall from EBMT and TICS 10-word list                                                 | -0.01 (-0.04, 0.01)  |
|                           | 18,652 |                      | Executive function | Semantic fluency                                                                                                      | 0.00 (-0.03, 0.02)   |
|                           | 16,916 |                      | Executive function | Digit span backward                                                                                                   | -0.03 (-0.06, -0.01) |
| Weuve 2012 (NHS)          | 16,887 | PM <sub>2.5-10</sub> | Global             | Global cognitive score                                                                                                | -0.02 (-0.03, -0.01) |
|                           | 19,409 |                      | Global             | TICS                                                                                                                  | -0.02 (-0.04, 0.00)  |
|                           | 16,906 |                      | Memory             | Composite of immediate/delayed recall from EBMT and TICS 10-word list                                                 | -0.03 (-0.04, -0.01) |
|                           | 18,652 |                      | Executive function | Semantic fluency                                                                                                      | -0.04 (-0.08, 0.00)  |
|                           | 16,916 |                      | Executive function | Digit span backward                                                                                                   | -0.02 (-0.04, -0.01) |

Abbreviations: CI: Confidence Interval; EBMT: East Boston Memory Test; N: Sample Size; NHS: Nurses' Health Study; NO: Nitrogen Oxide; NO<sub>2</sub>: Nitrogen dioxide; NOMAS: Northern Manhattan Study; NO<sub>x</sub>: Oxides of Nitrogen; PM<sub>10</sub>: Inhalable particles with diameters that are 10 µm in diameter or smaller; PM<sub>2.5</sub>: fine particulate matter less than 2.5 µm in diameter; PM<sub>2.5-10</sub>: Particulate matter with diameter between 2.5 and 10 microns; ppb: Parts per billion; ref: Reference; TICS: Telephone Interview of Cognitive Status; WHICAP: The Washington Heights-Inwood Community Aging Project; WHIMS: Women's Health Initiative Memory Study; WHIMS-ECHO: Women's Health Initiative Memory Study - Epidemiology of Cognitive Health Outcomes; WHISCA: Women's Health Initiative Study of Cognitive Aging;

- a) Only effect estimates reporting an association between air pollutants and cognitive change from studies that had 3 or more strengths according to our bias assessment are included in this table. We transformed each measure of association using the reported cognitive test standard deviation, length of time between follow-up assessments, and exposure contrast. Each effect estimate and associated 95% CI was transformed to reflect the 2-year change in standard deviation units of the cognitive test outcome per 10 µg/m<sup>3</sup> of the pollutant. If multiple associations between the same exposure and outcome were published, we reported those associations that used a continuous exposure contrast and did not adjust for potential intermediates.



**Table S3. Associations between air pollution exposure and incident dementia/cognitive impairment in qualifying studies <sup>a</sup>**

| Paper                                 | N       | Cases  | Exposure          | Dementia outcome                                 | Measured using medical records? | Measure of association | Exposure contrast        | Estimate (95% CI) |
|---------------------------------------|---------|--------|-------------------|--------------------------------------------------|---------------------------------|------------------------|--------------------------|-------------------|
| Cerza 2019 (Rome Longitudinal Cohort) | 350,844 | 21,548 | NO <sub>2</sub>   | Hospitalization for all-cause dementia           | Y                               | HR                     | Per 10 µg/m <sup>3</sup> | 0.97 (0.96, 0.99) |
|                                       |         | 7,671  |                   | Hospitalization for Alzheimer's disease dementia | Y                               | HR                     | Per 10 µg/m <sup>3</sup> | 0.91 (0.89, 0.94) |
| He 2020 (ZIMPHS)                      | 7,311   | 1,652  | NO <sub>2</sub>   | Incident cognitive impairment                    | N                               | OR                     | Per 10 µg/m <sup>3</sup> | 1 (0.66, 1.63)    |
| Cerza 2019 (Rome Longitudinal Cohort) | 350,844 | 21,548 | NO <sub>x</sub>   | Hospitalization for all-cause dementia           | Y                               | HR                     | Per 10 µg/m <sup>3</sup> | 1.00 (1.00, 1.01) |
|                                       |         | 7,671  |                   | Hospitalization for Alzheimer's disease dementia | Y                               | HR                     | Per 10 µg/m <sup>3</sup> | 0.98 (0.97, 0.99) |
| Oudin 2016 (Betula)                   | 1,806   | 275    | NO <sub>x</sub>   | All-cause dementia                               | Y                               | HR                     | Per 10 µg/m <sup>3</sup> | 1.05 (0.98, 1.12) |
|                                       |         | 173    |                   | Alzheimer's disease dementia                     | Y                               | HR                     | Per 10 µg/m <sup>3</sup> | 1.05 (0.97, 1.15) |
| Cerza 2019 (Rome Longitudinal Cohort) | 350,844 | 21,548 | Ozone             | Hospitalization for all-cause dementia           | Y                               | HR                     | Per 10 ppb               | 1.12 (1.06, 1.17) |
|                                       |         | 7,671  |                   | Hospitalization for Alzheimer's disease dementia | Y                               | HR                     | Per 10 ppb               | 0.96 (0.90, 1.04) |
| He 2020 (ZIMPHS)                      | 7,311   | 1,652  | Ozone             | Incident cognitive impairment                    | N                               | OR                     | Per 10 ppb               | 0.54 (0.23, 1.49) |
| Cerza 2019 (Rome Longitudinal Cohort) | 350,844 | 21,548 | PM <sub>10</sub>  | Hospitalization for all-cause dementia           | Y                               | HR                     | Per 10 µg/m <sup>3</sup> | 1 (0.98, 1.03)    |
|                                       |         | 7,671  |                   | Hospitalization for Alzheimer's disease dementia | Y                               | HR                     | Per 10 µg/m <sup>3</sup> | 0.95 (0.91, 0.99) |
| He 2020 (ZIMPHS)                      | 7,311   | 1,652  | PM <sub>10</sub>  | Incident cognitive impairment                    | N                               | OR                     | Per 10 µg/m <sup>3</sup> | 1.34 (0.98, 1.79) |
| Ailshire 2021 (HRS - 2004)            | 9,970   | 1,386  | PM <sub>2.5</sub> | Incident cognitive impairment                    | N                               | OR                     | Per 10 µg/m <sup>3</sup> | 1.19 (0.92, 1.52) |
| Ailshire 2021 (HRS - 2014)            | 9,185   | 964    | PM <sub>2.5</sub> | Incident cognitive impairment                    | N                               | OR                     | Per 10 µg/m <sup>3</sup> | 1.34 (0.74, 2.41) |
| Cerza 2019 (Rome Longitudinal Cohort) | 350,844 | 21,548 | PM <sub>2.5</sub> | Hospitalization for all-cause dementia           | Y                               | HR                     | Per 10 µg/m <sup>3</sup> | 0.98 (0.92, 1.04) |

|                                       |         |        |                                        |                                                  |   |    |                          |                   |
|---------------------------------------|---------|--------|----------------------------------------|--------------------------------------------------|---|----|--------------------------|-------------------|
|                                       |         | 7,671  |                                        | Hospitalization for Alzheimer's disease dementia | Y | HR | Per 10 µg/m <sup>3</sup> | 0.83 (0.72, 0.94) |
| He 2020 (ZIMPHS)                      | 7,311   | 1,652  | PM <sub>2.5</sub>                      | Incident cognitive impairment                    | N | OR | Per 10 µg/m <sup>3</sup> | 1.48 (1.01, 2.16) |
| Loop 2013 (REGARDS)                   | 20,150  | 1,633  | PM <sub>2.5</sub>                      | Mild cognitive impairment                        | N | OR | Per 10 µg/m <sup>3</sup> | 0.97 (0.72, 1.31) |
| Oudin 2018 (Betula)                   | 1,806   | 302    | Wood-burning-sourced PM <sub>2.5</sub> | All-cause dementia                               | Y | HR | Per 1 µg/m <sup>3</sup>  | 1.55 (1.00, 2.41) |
| Cerza 2019 (Rome Longitudinal Cohort) | 350,844 | 21,548 | PM <sub>2.5-10</sub>                   | Hospitalization for all-cause dementia           | Y | HR | Per 10 µg/m <sup>3</sup> | 0.96 (0.92, 1.00) |
|                                       |         | 7,671  |                                        | Hospitalization for Alzheimer's disease dementia | Y | HR | Per 10 µg/m <sup>3</sup> | 0.83 (0.76, 0.88) |

Abbreviations: CI: Confidence Interval; HR: Hazard Ratio; HRS: Health and Retirement Study; N: Sample Size; NO: Nitrogen Oxide; NO<sub>2</sub>: Nitrogen dioxide; NO<sub>x</sub>: Oxides of Nitrogen; O<sub>3</sub>: Ozone; OR: Odds Ratio; PM<sub>10</sub>: Inhalable particles with diameters that are 10 µm in diameter or smaller; PM<sub>2.5</sub>: fine particulate matter less than 2.5 µm in diameter; PM<sub>2.5-10</sub>: Particulate matter with diameter between 2.5 and 10 microns; ppb: Parts per billion; REGARDS: Reasons for Geographic and Racial Differences in Stroke; ZIMPHS: Zhejiang Major Public Health Surveillance Program;

- a) Only effect estimates reporting an association between air pollutants and incident dementia or cognitive impairment from studies that had 3 or more strengths according to our bias assessment are included in this table. We transformed associations to reflect common exposure contrasts (10 µg/m<sup>3</sup> for PM<sub>2.5</sub>, PM<sub>10</sub>, PM<sub>2.5-10</sub>, NO<sub>2</sub>, and NO<sub>x</sub>; 10 ppb for ozone; and 1 µg/m<sup>3</sup> for wood-burning-sourced PM<sub>2.5</sub>). If multiple associations between the same exposure and outcome were published, we reported those associations that used a continuous exposure contrast and did not adjust for potential intermediates.

**Table S4: Associations between air pollution exposure and neuroimaging outcomes in qualifying studies <sup>a</sup>**

| Paper                     | Exposure        | Volumetric outcomes |                                                              |                                  |                               |                         | Cerebrovascular outcomes |                                                               |                        |                    |                     |
|---------------------------|-----------------|---------------------|--------------------------------------------------------------|----------------------------------|-------------------------------|-------------------------|--------------------------|---------------------------------------------------------------|------------------------|--------------------|---------------------|
|                           |                 | N                   | Outcome measure                                              | Measure of association           | Exposure contrast             | Estimate (95% CI)       | N                        | Outcome measure                                               | Measure of association | Exposure contrast  | Estimate (95% CI)   |
| Crous-Bou 2020 (ALFA)     | NO <sub>2</sub> | 228                 | Hippocampal volume                                           | Difference (in mm <sup>3</sup> ) | Per 1 µg/m <sup>3</sup>       | -56.80 (-210.27, 96.67) |                          |                                                               |                        |                    |                     |
|                           |                 |                     | Ventricles volume                                            | Difference (in mm <sup>3</sup> ) | Per 1 µg/m <sup>3</sup>       | 34.30 (-38.42, 107.02)  |                          |                                                               |                        |                    |                     |
|                           |                 |                     | AD signature cortical thickness                              | Difference                       | Per 1 µg/m <sup>3</sup>       | -16.40 (-32.84, 0.04)   |                          |                                                               |                        |                    |                     |
| Kulick 2017 (NOMAS)       | NO <sub>2</sub> | 1,075               | Total cerebral brain volume / total cranial volume           | Difference                       | Per IQR = 3.63 ppb            | 0.00 (-0.18, 0.18)      | 1,075                    | Presence of subclinical brain infarct                         | OR                     | Per IQR = 3.63 ppb | 0.99 (0.85, 1.16)   |
|                           |                 |                     |                                                              |                                  |                               |                         |                          | Log-white matter hyperintensity volume / total cranial volume | Difference             | Per IQR = 3.63 ppb | -0.02 (-0.06, 0.03) |
| Nußbaum 2020 (1000BRAINS) | NO <sub>2</sub> | 590                 | Left hemisphere dorsolateral prefrontal cortex IGI           | Difference                       | Per IQR=5.3 µg/m <sup>3</sup> | -0.01 (-0.02, 0.00)     |                          |                                                               |                        |                    |                     |
|                           |                 |                     | Left hemisphere inferior parietal lobule IGI                 | Difference                       | Per IQR=5.3 µg/m <sup>3</sup> | 0.00 (-0.02, 0.01)      |                          |                                                               |                        |                    |                     |
|                           |                 |                     | Left hemisphere posterior cingulate cortex and precuneus IGI | Difference                       | Per IQR=5.3 µg/m <sup>3</sup> | -0.01 (-0.03, 0.00)     |                          |                                                               |                        |                    |                     |
|                           |                 |                     | Right hemisphere dorsolateral prefrontal cortex IGI          | Difference                       | Per IQR=5.3 µg/m <sup>3</sup> | -0.01 (-0.02, 0.01)     |                          |                                                               |                        |                    |                     |

|                           |               |       |                                                               |                                |                                       |                           |       |                                                               |            |                     |                        |
|---------------------------|---------------|-------|---------------------------------------------------------------|--------------------------------|---------------------------------------|---------------------------|-------|---------------------------------------------------------------|------------|---------------------|------------------------|
|                           |               |       | Right hemisphere inferior parietal lobule IGI                 | Difference                     | Per IQR=5.3 $\mu\text{g}/\text{m}^3$  | -0.01<br>(-0.03, 0.00)    |       |                                                               |            |                     |                        |
|                           |               |       | Right hemisphere posterior cingulate cortex and precuneus IGI | Difference                     | Per IQR=5.3 $\mu\text{g}/\text{m}^3$  | -0.02<br>(-0.04, 0.00)    |       |                                                               |            |                     |                        |
| Crous-Bou 2020 (ALFA)     | $\text{NO}_x$ | 228   | Hippocampal volume                                            | Difference (in $\text{mm}^3$ ) | Per 1 $\mu\text{g}/\text{m}^3$        | -76.10<br>(-161.75, 9.55) |       |                                                               |            |                     |                        |
|                           |               |       | Ventricles volume                                             | Difference (in $\text{mm}^3$ ) | Per 1 $\mu\text{g}/\text{m}^3$        | 50.90<br>(-21.62, 123.42) |       |                                                               |            |                     |                        |
|                           |               |       | AD signature cortical thickness                               | Difference                     | Per 1 $\mu\text{g}/\text{m}^3$        | -36.80<br>(-77.37, 3.77)  |       |                                                               |            |                     |                        |
| Kulick 2017 (NOMAS)       | $\text{NO}_x$ | 1,075 | Total cerebral brain volume / total cranial volume            | Difference                     | Per IQR = 13.94 ppb                   | -0.01<br>(-0.21, 0.19)    | 1,075 | Presence of subclinical brain infarct                         | OR         | Per IQR = 13.94 ppb | 0.99<br>(0.84, 1.18)   |
|                           |               |       |                                                               |                                |                                       |                           |       | Log-white matter hyperintensity volume / total cranial volume | Difference | Per IQR = 13.94 ppb | -0.02<br>(-0.07, 0.04) |
| Nußbaum 2020 (1000BRAINS) | $\text{NO}_x$ | 590   | Left hemisphere dorsolateral prefrontal cortex IGI            | Difference                     | Per IQR=14.0 $\mu\text{g}/\text{m}^3$ | -0.01<br>(-0.02, 0.01)    |       |                                                               |            |                     |                        |
|                           |               |       | Left hemisphere inferior parietal lobule IGI                  | Difference                     | Per IQR=14.0 $\mu\text{g}/\text{m}^3$ | 0.00<br>(-0.02, 0.01)     |       |                                                               |            |                     |                        |
|                           |               |       | Left hemisphere posterior cingulate cortex and precuneus IGI  | Difference                     | Per IQR=14.0 $\mu\text{g}/\text{m}^3$ | -0.02<br>(-0.04, 0.00)    |       |                                                               |            |                     |                        |
|                           |               |       | Right hemisphere dorsolateral prefrontal cortex IGI           | Difference                     | Per IQR=14.0 $\mu\text{g}/\text{m}^3$ | -0.01<br>(-0.02, 0.01)    |       |                                                               |            |                     |                        |

|                           |                  |       |                                                               |                                  |                                       |                           |       |                                                               |            |                   |                       |
|---------------------------|------------------|-------|---------------------------------------------------------------|----------------------------------|---------------------------------------|---------------------------|-------|---------------------------------------------------------------|------------|-------------------|-----------------------|
|                           |                  |       | Right hemisphere inferior parietal lobule IGI                 | Difference                       | Per IQR=14.0 $\mu\text{g}/\text{m}^3$ | -0.02<br>(-0.03, 0.00)    |       |                                                               |            |                   |                       |
|                           |                  |       | Right hemisphere posterior cingulate cortex and precuneus IGI | Difference                       | Per IQR=14.0 $\mu\text{g}/\text{m}^3$ | -0.02<br>(-0.04, -0.01)   |       |                                                               |            |                   |                       |
| Kulick 2017 (NOMAS)       | Ozone            | 1,075 | Total cerebral brain volume / total cranial volume            | Difference                       | Per IQR = 1.2 ppb                     | 0.21<br>(-0.06, 0.48)     | 1,075 | Presence of subclinical brain infarct                         | OR         | Per IQR = 1.2 ppb | 0.91<br>(0.72, 1.14)  |
|                           |                  |       |                                                               |                                  |                                       |                           |       | Log-white matter hyperintensity volume / total cranial volume | Difference | Per IQR = 1.2 ppb | 0.01<br>(-0.06, 0.08) |
| Crous-Bou 2020 (ALFA)     | PM <sub>10</sub> | 228   | Hippocampal volume                                            | Difference (in mm <sup>3</sup> ) | Per 1 $\mu\text{g}/\text{m}^3$        | -55.1<br>(-173.29, 63.09) |       |                                                               |            |                   |                       |
|                           |                  |       | Ventricles volume                                             | Difference (in mm <sup>3</sup> ) | Per 1 $\mu\text{g}/\text{m}^3$        | 77.00<br>(-13.55, 167.55) |       |                                                               |            |                   |                       |
|                           |                  |       | AD signature cortical thickness                               | Difference                       | Per 1 $\mu\text{g}/\text{m}^3$        | -5.34<br>(-10.93, 0.25)   |       |                                                               |            |                   |                       |
| Nußbaum 2020 (1000BRAINS) | PM <sub>10</sub> | 590   | Left hemisphere dorsolateral prefrontal cortex IGI            | Difference                       | Per IQR=2.0 $\mu\text{g}/\text{m}^3$  | 0.00<br>(-0.02, 0.01)     |       |                                                               |            |                   |                       |
|                           |                  |       | Left hemisphere inferior parietal lobule IGI                  | Difference                       | Per IQR=2.0 $\mu\text{g}/\text{m}^3$  | 0.00<br>(-0.02, 0.01)     |       |                                                               |            |                   |                       |
|                           |                  |       | Left hemisphere posterior cingulate cortex and precuneus IGI  | Difference                       | Per IQR=2.0 $\mu\text{g}/\text{m}^3$  | -0.01<br>(-0.03, 0.01)    |       |                                                               |            |                   |                       |
|                           |                  |       | Right hemisphere dorsolateral prefrontal cortex IGI           | Difference                       | Per IQR=2.0 $\mu\text{g}/\text{m}^3$  | -0.01<br>(-0.02, 0.01)    |       |                                                               |            |                   |                       |

|                       |                   |       |                                                               |                                  |                                         |                            |       |                                       |    |                                         |                      |
|-----------------------|-------------------|-------|---------------------------------------------------------------|----------------------------------|-----------------------------------------|----------------------------|-------|---------------------------------------|----|-----------------------------------------|----------------------|
|                       |                   |       | Right hemisphere inferior parietal lobule IGI                 | Difference                       | Per IQR=2.0 $\mu\text{g}/\text{m}^3$    | -0.02<br>(-0.03, 0.00)     |       |                                       |    |                                         |                      |
|                       |                   |       | Right hemisphere posterior cingulate cortex and precuneus IGI | Difference                       | Per IQR=2.0 $\mu\text{g}/\text{m}^3$    | -0.02<br>(-0.04, 0.00)     |       |                                       |    |                                         |                      |
| Power 2018 (ARIC)     | PM <sub>10</sub>  | 1,749 | Total brain volume                                            | Difference (in SD units)         | Per 1 $\mu\text{g}/\text{m}^3$          | 0.00<br>(-0.02, 0.01)      | 1,747 | Presence of infarct                   | OR | Per 1 $\mu\text{g}/\text{m}^3$          | 1.00<br>(0.94, 1.07) |
|                       |                   | 1,745 | AD signature                                                  | Difference (in SD units)         | Per 1 $\mu\text{g}/\text{m}^3$          | 0.01<br>(-0.02, 0.04)      | 1,746 | Severe white matter hyperintensity    | OR | Per 1 $\mu\text{g}/\text{m}^3$          | 0.96<br>(0.90, 1.02) |
|                       |                   | 1,745 | Deep gray matter volume                                       | Difference (in SD units)         | Per 1 $\mu\text{g}/\text{m}^3$          | -0.02<br>(-0.04, 0.00)     | 1,747 | Presence of lacunes                   | OR | Per 1 $\mu\text{g}/\text{m}^3$          | 1.00<br>(0.93, 1.07) |
|                       |                   | 1,745 | Frontal lobe volume                                           | Difference (in SD units)         | Per 1 $\mu\text{g}/\text{m}^3$          | 0.00<br>(-0.02, 0.02)      | 1,736 | Presence of microbleeds               | OR | Per 1 $\mu\text{g}/\text{m}^3$          | 1.05<br>(0.97, 1.13) |
|                       |                   | 1,738 | Hippocampal volume                                            | Difference (in SD units)         | Per 1 $\mu\text{g}/\text{m}^3$          | -0.01<br>(-0.03, 0.02)     | 1,723 | Presence of lobar microbleeds         | OR | Per 1 $\mu\text{g}/\text{m}^3$          | 1.05<br>(0.96, 1.16) |
|                       |                   | 1,745 | Occipital lobe volume                                         | Difference (in SD units)         | Per 1 $\mu\text{g}/\text{m}^3$          | 0.00<br>(-0.03, 0.04)      | 1,723 | Presence of subcortical microbleeds   | OR | Per 1 $\mu\text{g}/\text{m}^3$          | 1.05<br>(0.97, 1.13) |
|                       |                   | 1,745 | Parietal lobe volume                                          | Difference (in SD units)         | Per 1 $\mu\text{g}/\text{m}^3$          | 0.00<br>(-0.01, 0.02)      |       |                                       |    |                                         |                      |
|                       |                   | 1,745 | Temporal lobe volume                                          | Difference (in SD units)         | Per 1 $\mu\text{g}/\text{m}^3$          | 0.01<br>(-0.02, 0.05)      |       |                                       |    |                                         |                      |
| Crous-Bou 2020 (ALFA) | PM <sub>2.5</sub> | 228   | Hippocampal volume                                            | Difference (in mm <sup>3</sup> ) | Per 1 $\mu\text{g}/\text{m}^3$          | -44.90<br>(-108.21, 18.41) |       |                                       |    |                                         |                      |
|                       |                   |       | Ventricles volume                                             | Difference (in mm <sup>3</sup> ) | Per 1 $\mu\text{g}/\text{m}^3$          | -4.00<br>(-52.80, 44.80)   |       |                                       |    |                                         |                      |
|                       |                   |       | AD signature cortical thickness                               | Difference                       | Per 1 $\mu\text{g}/\text{m}^3$          | -2.46<br>(-5.44, 0.52)     |       |                                       |    |                                         |                      |
| Kulick 2017 (NOMAS)   | PM <sub>2.5</sub> | 1,075 | Total cerebral brain volume / total cranial volume            | Difference                       | Per IQR = 1.48 $\mu\text{g}/\text{m}^3$ | -0.12<br>(-0.38, 0.14)     | 1,075 | Presence of subclinical brain infarct | OR | Per IQR = 1.48 $\mu\text{g}/\text{m}^3$ | 1.13<br>(0.91, 1.40) |



|                         |                      |       |                                                 |                                  |                                   |                           |     |                                                      |                                     |                                |                                |
|-------------------------|----------------------|-------|-------------------------------------------------|----------------------------------|-----------------------------------|---------------------------|-----|------------------------------------------------------|-------------------------------------|--------------------------------|--------------------------------|
|                         |                      | 1,745 | Parietal lobe volume                            | Difference (in SD units)         | Per 1 $\mu\text{g}/\text{m}^3$    | -0.02<br>(-0.07, 0.03)    |     |                                                      |                                     |                                |                                |
|                         |                      | 1,745 | Temporal lobe volume                            | Difference (in SD units)         | Per 1 $\mu\text{g}/\text{m}^3$    | 0.00<br>(-0.07, 0.07)     |     |                                                      |                                     |                                |                                |
| Wilker 2015 (FOS)       | PM <sub>2.5</sub>    | 929   | Total cerebral volume / total cranial volume    | Difference                       | Per 2 $\mu\text{g}/\text{m}^3$    | -0.32<br>(-0.59, -0.05)   | 926 | Covert brain infarcts                                | OR                                  | Per 2 $\mu\text{g}/\text{m}^3$ | 1.46<br>(1.10, 1.94)           |
|                         |                      | 921   | Total hippocampal volume / total cranial volume | Difference                       | Per 2 $\mu\text{g}/\text{m}^3$    | 0.00<br>(-0.01, 0.01)     | 929 | Excessive white matter hyperintensity volume for age | OR                                  | Per 2 $\mu\text{g}/\text{m}^3$ | 1<br>(0.76, 1.32)              |
|                         |                      |       |                                                 |                                  |                                   |                           |     | 929                                                  | Log (white matter hyperintensities) | Difference                     | Per 2 $\mu\text{g}/\text{m}^3$ |
| Wilker 2016 (MADRC)     | PM <sub>2.5</sub>    | 202   | Brain parenchymal fraction                      | % Difference                     | Per 2 $\mu\text{g}/\text{m}^3$    | 0.02<br>(-0.52, 0.56)     | 236 | Log white matter hyperintensities                    | Difference (in cc)                  | Per 2 $\mu\text{g}/\text{m}^3$ | -0.19<br>(-0.37, -0.01)        |
|                         |                      |       |                                                 |                                  |                                   |                           |     | 236                                                  | Microbleed presence                 | OR                             | Per 2 $\mu\text{g}/\text{m}^3$ |
| Younan 2020 (WHIMS-MRI) | PM <sub>2.5</sub>    | 1,361 | AD pattern similarity score                     | Difference                       | Per 3.24 $\mu\text{g}/\text{m}^3$ | 0.00<br>(-0.02, 0.01)     |     |                                                      |                                     |                                |                                |
|                         |                      | 709   | 5-year change in AD pattern similarity score    | Difference                       | Per 3.24 $\mu\text{g}/\text{m}^3$ | 0.03<br>(0.01, 0.05)      |     |                                                      |                                     |                                |                                |
| Crous-Bou 2020 (ALFA)   | PM <sub>2.5-10</sub> | 228   | Hippocampal volume                              | Difference (in mm <sup>3</sup> ) | Per 1 $\mu\text{g}/\text{m}^3$    | -28.70<br>(-99.65, 42.25) |     |                                                      |                                     |                                |                                |
|                         |                      |       | Ventricles volume                               | Difference (in mm <sup>3</sup> ) | Per 1 $\mu\text{g}/\text{m}^3$    | 52.7<br>(2.52, 102.88)    |     |                                                      |                                     |                                |                                |
|                         |                      |       | AD signature cortical thickness                 | Difference                       | Per 1 $\mu\text{g}/\text{m}^3$    | -3.00<br>(-6.08, 0.08)    |     |                                                      |                                     |                                |                                |

Abbreviations: 1000BRAINS: Cohort study of the 1000Brains population; AD: Alzheimer's Disease; ALFA: Alzheimer's and Families; ARIC: Atherosclerosis Risk in Communities Study;; CI: Confidence Interval; FOS: Framingham Offspring Study;; IGI: Local Gyrfication Index ;IQR: Interquartile Range; MADRC: Massachusetts's Alzheimer's Disease Research Center; mm<sup>3</sup>: cubic millimeter; N: Sample Size; NO: Nitrogen Oxide; NO<sub>2</sub>: Nitrogen dioxide; NOMAS: Northern Manhattan Study; NO<sub>x</sub>: Oxides of Nitrogen;; OR: Odds Ratio; PM<sub>10</sub>: Inhalable particles with diameters that are 10  $\mu\text{m}$  in diameter or smaller; PM<sub>2.5</sub>: fine particulate matter



less than 2.5  $\mu\text{m}$  in diameter;  $\text{PM}_{2.5-10}$ : Particulate matter with diameter between 2.5 and 10 microns; ppb: Parts per billion; SD: Standard Deviation; WHIMS-MRI: Women's Health Initiative Magnetic Resonance Imaging;

a) Only effect estimates reporting an association between air pollutants and neuroimaging outcomes from studies that had 3 or more strengths according to our bias assessment are included in this table. We did not transform effect estimates for associations with neuroimaging outcomes. Instead, we report the original exposure contrast for each measure of association. If multiple associations between the same exposure and outcome were published, we reported those associations that used a continuous exposure contrast and did not adjust for potential intermediates.

**Table S5: Associations between traffic-related air pollution exposure and cognitive level in qualifying studies <sup>a</sup>**

| Paper                 | N     | Exposure                     | Exposure Contrast       | Cognitive domain   | Test(s)                                                                                                                                                         | Outcome    | Measure of association | Estimate (95% CI)    |
|-----------------------|-------|------------------------------|-------------------------|--------------------|-----------------------------------------------------------------------------------------------------------------------------------------------------------------|------------|------------------------|----------------------|
| Crous-Bou 2020 (ALFA) | 958   | PM <sub>2.5</sub> absorbance | Per 1 µg/m <sup>3</sup> | Global             | Modified-PACC composite                                                                                                                                         | Test score | Difference             | 0.02 (-0.04, 0.08)   |
|                       |       |                              |                         | Memory             | Memory binding test                                                                                                                                             | Test score | Difference             | 0.08 (0.00, 0.16)    |
|                       |       |                              |                         | Executive function | WAIS-IV subtests                                                                                                                                                | Test score | Difference             | -0.02 (-0.08, 0.04)  |
| Kulick 2020 (NOMAS)   | 1,093 | Distance to road             | Per IQR = 278.1 meters  | Global             | Global cognitive score                                                                                                                                          | Test score | Difference             | -0.06 (-0.12, 0.00)  |
|                       |       |                              |                         | Memory             | Modified California Verbal Learning Test                                                                                                                        | Test score | Difference             | -0.13 (-0.23, -0.04) |
|                       |       |                              |                         | Executive function | (Color Trails 2-Color Trails 1), Controlled Oral Word Association Test, Odd Man Out, Digit Reordering                                                           | Test score | Difference             | -0.08 (-0.17, 0.02)  |
|                       |       |                              |                         | Executive function | Boston Naming Test (15-item), Animal Naming, Color Trails 2, Color Trails 1, Grooved Pegboard, Letter-Number Sequencing, Symbol Digit Modalities                | Test score | Difference             | -0.02 (-0.11, 0.08)  |
| Kulick 2020 (WHICAP)  | 5,330 | Distance to road             | Per IQR = 277.6 meters  | Global             | Global cognitive score                                                                                                                                          | Test score | Difference             | -0.01 (-0.03, 0.02)  |
|                       |       |                              |                         | Memory             | Selective Reminding test                                                                                                                                        | Test score | Difference             | -0.01 (-0.04, 0.02)  |
|                       |       |                              |                         | Executive function | (Color Trails 2-Color Trails 1), Controlled Oral Word Association Test, Identities and Oddities; similarities subset from the Wechsler Adult Intelligence Scale | Test score | Difference             | 0.02 (-0.01, 0.05)   |

|                                 |     |                                 |                             |                        |                                                                                                                                                         |                 |            |                     |
|---------------------------------|-----|---------------------------------|-----------------------------|------------------------|---------------------------------------------------------------------------------------------------------------------------------------------------------|-----------------|------------|---------------------|
|                                 |     |                                 |                             | Executive function     | Boston Naming Test (15-item), Animal Naming, Comprehension subtest from the Boston Diagnostic Aphasia Exam, Color Trails 2, Color Trails 1              | Test score      | Difference | 0.01 (-0.01, 0.04)  |
| Nusbaum<br>2020<br>(1000BRAINS) | 615 | PM <sub>2.5</sub><br>absorbance | Per 0.3 10 <sup>-5</sup> /m | Memory                 | Benton figural memory test; Verbaler Gedächtnistest (VGT) verbal learning test; VGT delayed                                                             | Test score rank | Difference | -0.02 (-0.06, 0.02) |
|                                 |     |                                 |                             | Memory                 | Visual-Pattern-test; Block-tapping test (BTT) forwards; BTT backwards; Zahlennachsprechen (ZNS) verbal memory test forwards; ZNS backwards              | Test score rank | Difference | 0.00 (-0.03, 0.03)  |
|                                 |     |                                 |                             | Executive function     | Subtest 3 of "Leistungsprüfungssystem 50+", problem solving test; Fünf-Punkte figural fluency test; Trail making test B-A; Color-Word Interference Test | Test score rank | Difference | 0.01 (-0.03, 0.04)  |
|                                 |     |                                 |                             | Executive function     | Regensburger Wortflüssigkeitstest phonemic fluency and semantic fluency tests; Wortschatztest vocabulary test                                           | Test score rank | Difference | -0.01 (-0.05, 0.03) |
|                                 |     |                                 |                             | Executive function     | Alters-Konzentrations selective attention test; Trail Making test (part A)                                                                              | Test score rank | Difference | 0.01 (-0.03, 0.06)  |
|                                 |     |                                 |                             | Memory                 | Benton figural memory test; Verbaler Gedächtnistest (VGT) verbal learning test; VGT delayed                                                             | Test score rank | Difference | -0.07 (-0.23, 0.08) |
|                                 |     |                                 |                             | Memory                 | Visual-Pattern-test; Block-tapping test (BTT) forwards; BTT backwards; Zahlennachsprechen (ZNS) verbal memory test forwards; ZNS backwards              | Test score rank | Difference | -0.07 (-0.19, 0.05) |
|                                 |     |                                 |                             | Distance to major road | 100-200 meters vs. ≥ 200 meters                                                                                                                         |                 |            |                     |

|                                 |                    |                                                                                                                                                         |                 |            |                     |
|---------------------------------|--------------------|---------------------------------------------------------------------------------------------------------------------------------------------------------|-----------------|------------|---------------------|
| <100 meters vs.<br>≥ 200 meters | Executive function | Subtest 3 of "Leistungsprüfungssystem 50+", problem solving test; Fünf-Punkte figural fluency test; Trail making test B-A; Color-Word Interference Test | Test score rank | Difference | 0.07 (-0.07, 0.20)  |
|                                 | Executive function | Regensburger Wortflüssigkeitstest phonemic fluency and semantic fluency tests; Wortschatztest vocabulary test                                           | Test score rank | Difference | -0.05 (-0.20, 0.09) |
|                                 | Executive function | Alters-Konzentrations selective attention test; Trail Making test (part A)                                                                              | Test score rank | Difference | 0.12 (-0.04, 0.29)  |
|                                 | Memory             | Benton figural memory test; Verbaler Gedächtnistest (VGT) verbal learning test; VGT delayed                                                             | Test score rank | Difference | 0.02 (-0.15, 0.19)  |
|                                 | Memory             | Visual-Pattern-test; Block-tapping test (BTT) forwards; BTT backwards; Zahlennachsprechen (ZNS) verbal memory test forwards; ZNS backwards              | Test score rank | Difference | 0.12 (-0.02, 0.25)  |
|                                 | Executive function | Subtest 3 of "Leistungsprüfungssystem 50+", problem solving test; Fünf-Punkte figural fluency test; Trail making test B-A; Color-Word Interference Test | Test score rank | Difference | 0.06 (-0.09, 0.20)  |
|                                 | Executive function | Regensburger Wortflüssigkeitstest phonemic fluency and semantic fluency tests; Wortschatztest vocabulary test                                           | Test score rank | Difference | 0.03 (-0.13, 0.19)  |
|                                 | Executive function | Alters-Konzentrations selective attention test; Trail Making test (part A)                                                                              | Test score rank | Difference | 0.12 (-0.06, 0.30)  |

|                          |       |                                                                       |                                                                           |                                                                                               |                                                                                                                                                  |                             |                     |                     |
|--------------------------|-------|-----------------------------------------------------------------------|---------------------------------------------------------------------------|-----------------------------------------------------------------------------------------------|--------------------------------------------------------------------------------------------------------------------------------------------------|-----------------------------|---------------------|---------------------|
| Power 2011 (NAS)         | 680   | Black carbon                                                          | Doubling of BC concentration                                              | Global                                                                                        | Digit span backward, verbal fluency, constructional praxis, immediate recall of 10 item list, delayed recall of 10 item list, pattern comparison | Composite of z-scores       | Difference          | -0.05 (-0.10, 0.00) |
|                          |       |                                                                       | Doubling of BC concentration                                              | Global                                                                                        | MMSE                                                                                                                                             | Poor performance (score<26) | OR                  | 1.30 (1.10, 1.60)   |
| Ranft 2009 (SALIA)       | 396   | Distance to road                                                      | ≤ 50 meters to busy road vs. >50 meters                                   | Global                                                                                        | CERAD-plus test                                                                                                                                  | Test score                  | Difference          | -3.8 (-7.80, 0.10)  |
|                          | 308   |                                                                       |                                                                           | Executive function                                                                            | Stroop test                                                                                                                                      | Log(test score)             | Difference          | -5.1 (-8.20, -2.00) |
|                          | 377   |                                                                       |                                                                           | Other                                                                                         | Sniffing test                                                                                                                                    | Test score                  | Difference          | -1.3 (-2.40, -0.20) |
| Rocha 2021 (ELSA-Brasil) | 3,050 | Combined distance-weighted traffic density of residence and workplace | Tertile 2 (15.3-256.9 vehicles/hour) vs. Tertile 1 (0-15.3 vehicles/hour) | Global                                                                                        | Composite global cognitive score (averaged and standardized z-scores of all tests)                                                               | Test score                  | Difference          | -0.03 (-0.13, 0.06) |
|                          |       |                                                                       |                                                                           | Memory                                                                                        | Consortium to Establish a Registry for Alzheimer's Disease Word List Memory Test (CERAD-WLMT)                                                    | Test score                  | Difference          | -0.04 (-0.15, 0.08) |
|                          |       |                                                                       |                                                                           | Executive function                                                                            | Semantic Verbal Fluency Test (SVFT), Phonemic Verbal Fluency Test (PVFT)                                                                         | Test score                  | Difference          | 0.01 (-0.11, 0.12)  |
|                          |       |                                                                       | Executive function                                                        | Trail Making Test, version B (TMT)                                                            | Test score                                                                                                                                       | Difference                  | -0.06 (-0.15, 0.04) |                     |
|                          |       |                                                                       | Global                                                                    | Composite global cognitive score (averaged and standardized z-scores of all tests)            | Test score                                                                                                                                       | Difference                  | 0.03 (-0.07, 0.13)  |                     |
|                          |       |                                                                       | Memory                                                                    | Consortium to Establish a Registry for Alzheimer's Disease Word List Memory Test (CERAD-WLMT) | Test score                                                                                                                                       | Difference                  | 0.03 (-0.08, 0.15)  |                     |

|                         |     |                                                |                                                                                |                    |                                                                                               |            |            |                     |
|-------------------------|-----|------------------------------------------------|--------------------------------------------------------------------------------|--------------------|-----------------------------------------------------------------------------------------------|------------|------------|---------------------|
|                         |     |                                                |                                                                                | Executive function | Semantic Verbal Fluency Test (SVFT), Phonemic Verbal Fluency Test (PVFT)                      | Test score | Difference | 0.03 (-0.09, 0.14)  |
|                         |     |                                                |                                                                                | Executive function | Trail Making Test, version B (TMT)                                                            | Test score | Difference | -0.01 (-0.09, 0.11) |
|                         |     | Distance-weighted traffic density of residence | Tertile 2 (51.1-557.2 vehicles/hour) vs. Tertile 1 (0.2-51.1 vehicles/hour)    | Global             | Composite global cognitive score (averaged and standardized z-scores of all tests)            | Test score | Difference | 0.04 (-0.03, 0.10)  |
|                         |     |                                                |                                                                                | Memory             | Consortium to Establish a Registry for Alzheimer's Disease Word List Memory Test (CERAD-WLMT) | Test score | Difference | 0.01 (-0.07, 0.08)  |
|                         |     |                                                |                                                                                | Executive function | Semantic Verbal Fluency Test (SVFT), Phonemic Verbal Fluency Test (PVFT)                      | Test score | Difference | 0.07 (-0.01, 0.15)  |
|                         |     |                                                |                                                                                | Executive function | Trail Making Test, version B (TMT)                                                            | Test score | Difference | 0.02 (-0.05, 0.08)  |
|                         |     |                                                | Tertile 3 (557.6-19351.2 vehicles/hour) vs. Tertile 1 (0.2-51.1 vehicles/hour) | Global             | Composite global cognitive score (averaged and standardized z-scores of all tests)            | Test score | Difference | 0.10 (0.04, 0.17)   |
|                         |     |                                                |                                                                                | Memory             | Consortium to Establish a Registry for Alzheimer's Disease Word List Memory Test (CERAD-WLMT) | Test score | Difference | 0.08 (0.00, 0.16)   |
|                         |     |                                                |                                                                                | Executive function | Semantic Verbal Fluency Test (SVFT), Phonemic Verbal Fluency Test (PVFT)                      | Test score | Difference | 0.09 (0.01, 0.17)   |
|                         |     |                                                |                                                                                | Executive function | Trail Making Test, version B (TMT)                                                            | Test score | Difference | 0.07 (0.00, 0.13)   |
| Schikowski 2015 (SALIA) | 789 | Traffic load                                   | Per 26.7 thousand cars / km driven per day                                     | Global             | MMSE                                                                                          | Test score | Difference | 0.04 (-0.18, 0.26)  |
|                         |     |                                                |                                                                                | Global             | CERaD total score                                                                             | Test score | Difference | -0.40 (-2.16, 1.36) |
|                         |     |                                                |                                                                                | Memory             | Word list learning                                                                            | Test score | Difference | -0.02 (-0.22, 0.19) |
|                         |     |                                                |                                                                                | Memory             | Word list recall                                                                              | Test score | Difference | -0.02 (-0.22, 0.17) |
|                         |     |                                                |                                                                                | Memory             | Figure recall                                                                                 | Test score | Difference | 0.03 (-0.23, 0.17)  |

|                                     |       |                           |                            |                    |                          |            |            |                     |
|-------------------------------------|-------|---------------------------|----------------------------|--------------------|--------------------------|------------|------------|---------------------|
|                                     |       |                           |                            | Memory             | Boston naming test       | Test score | Difference | -0.03 (-0.24, 0.17) |
|                                     |       |                           |                            | Executive function | Semantic fluency         | Test score | Difference | 0.09 (-0.08, 0.25)  |
|                                     |       |                           |                            | Executive function | Phonemic fluency         | Test score | Difference | -0.07 (-0.27, 0.13) |
|                                     |       |                           |                            | Executive function | Trail making A           | Test score | Difference | 0.08 (-0.10, 0.26)  |
|                                     |       |                           |                            | Executive function | Trail making B           | Test score | Difference | 0.13 (-0.05, 0.31)  |
|                                     |       |                           |                            | Executive function | Trail making B/A         | Test score | Difference | 0.07 (-0.11, 0.25)  |
|                                     |       |                           |                            | Other              | Figure copying           | Test score | Difference | -0.10 (-0.35, 0.14) |
| Tonne 2014 (Whitehall II)           | 2,762 | PM <sub>10</sub> exhaust  | Per 0.3 µg/m <sup>3</sup>  | Memory             | 20 word free recall list | Test score | Difference | 0.01 (-0.02, 0.03)  |
|                                     | 2,761 |                           |                            | Executive function | Semantic fluency         | Test score | Difference | -0.03 (-0.06, 0.01) |
|                                     | 2,749 |                           |                            | Executive function | Phonemic fluency         | Test score | Difference | -0.03 (-0.06, 0.00) |
|                                     | 2,767 |                           |                            | Executive function | Alice Heim 4-I test      | Test score | Difference | 0.01 (-0.03, 0.05)  |
|                                     | 2,762 | PM <sub>2.5</sub> exhaust | Per 0.27 µg/m <sup>3</sup> | Memory             | 20 word free recall list | Test score | Difference | 0.01 (-0.04, 0.06)  |
|                                     | 2,761 |                           |                            | Executive function | Semantic fluency         | Test score | Difference | -0.04 (-0.10, 0.01) |
|                                     | 2,749 |                           |                            | Executive function | Phonemic fluency         | Test score | Difference | 0.02 (-0.04, 0.08)  |
|                                     | 2,767 |                           |                            | Executive function | Alice Heim 4-I test      | Test score | Difference | -0.05 (-0.09, 0.00) |
| Tzivian 2016 (Heinz Nixdorf RECALL) | 4,050 | Traffic load              | Per vehicle-meter/day      | Global             | Global cognitive score   | Test score | Difference | 0.02 (-0.04, 0.07)  |
|                                     |       |                           |                            | Memory             | 8 word immediate recall  | Test score | Difference | -0.01 (-0.03, 0.03) |
|                                     |       |                           |                            | Memory             | 8 word delayed recall    | Test score | Difference | -0.01 (-0.03, 0.03) |
|                                     |       |                           |                            | Executive function | Semantic fluency         | Test score | Difference | 0.01 (-0.02, 0.03)  |
|                                     |       |                           |                            | Executive function | Labyrinth test           | Test score | Difference | 0.01 (-0.02, 0.04)  |
|                                     |       |                           |                            | Other              | Clock drawing            | Test score | OR         | 1.03 (0.98, 1.09)   |

Wellenius  
2012  
(MOBILIZE  
Boston)

|     |                     |                                            |                       |                                                          |                                |            |                      |
|-----|---------------------|--------------------------------------------|-----------------------|----------------------------------------------------------|--------------------------------|------------|----------------------|
| 765 | Black carbon        | Per IQR = 0.11<br>$\mu\text{g}/\text{m}^3$ | Global                | MMSE                                                     | Poor performance<br>(score<26) | OR         | 1.15 (0.99, 1.34)    |
|     |                     |                                            | Memory                | Immediate recall from<br>Hopkins Verbal Learning<br>Test | Test score                     | Difference | -0.36 (-0.71, -0.01) |
|     |                     |                                            | Memory                | Delayed recall from Hopkins<br>Verbal Learning Test      | Test score                     | Difference | -0.14 (-0.37, 0.09)  |
|     |                     |                                            | Memory                | Recognition from Hopkins<br>Verbal Learning Test         | Test score                     | Difference | 0.03 (-0.12, 0.17)   |
|     |                     |                                            | Executive<br>function | Phonemic fluency                                         | Test score                     | Difference | -0.26 (-1.04, 0.53)  |
|     |                     |                                            | Executive<br>function | Semantic fluency                                         | Test score                     | Difference | 0.05 (-0.26, 0.35)   |
|     |                     |                                            | Executive<br>function | Trail making A                                           | Test score                     | Difference | -0.59 (-3.35, 2.17)  |
|     |                     |                                            | Executive<br>function | Trail making B                                           | Test score                     | Difference | -2.51 (-7.94, 2.91)  |
|     |                     |                                            | Executive<br>function | Delta of TMT                                             | Test score                     | Difference | -2.23 (-6.57, 2.11)  |
|     |                     |                                            | Other                 | Clock in the Box                                         | Test score                     | Difference | -0.04 (-0.13, 0.05)  |
|     | Distance to<br>road | Per 851.2<br>meters                        | Global                | MMSE                                                     | Test score< 26                 | Odds ratio | 1.07 (0.84, 1.36)    |
|     |                     |                                            | Memory                | Immediate recall from<br>Hopkins Verbal Learning<br>Test | Test score                     | Difference | -0.60 (-1.10, -0.10) |
|     |                     |                                            | Memory                | Delayed recall from Hopkins<br>Verbal Learning Test      | Test score                     | Difference | -0.40 (-0.70, -0.10) |
|     |                     |                                            | Memory                | Recognition from Hopkins<br>Verbal Learning Test         | Test score                     | Difference | 0.07 (-0.12, 0.25)   |
|     |                     |                                            | Executive<br>function | Letter fluency                                           | Test score                     | Difference | -1.40 (-2.70, -0.20) |
|     |                     |                                            | Executive<br>function | Category fluency                                         | Test score                     | Difference | -0.70 (-1.10, -0.30) |
|     |                     |                                            | Executive<br>function | Trail making Test Part A                                 | Test score                     | Difference | 2.10 (-0.70, 4.90)   |
|     |                     |                                            | Executive<br>function | Trail making test Part B                                 | Test score                     | Difference | 10.5 (4.00, 17.10)   |



|                  |        |                        |                                       |                    |                  |            |            |                      |
|------------------|--------|------------------------|---------------------------------------|--------------------|------------------|------------|------------|----------------------|
|                  |        |                        |                                       | Executive function | Delta of TMT     | Test score | Difference | 7.50 (2.20, 12.80)   |
|                  |        |                        |                                       | Other              | Clock in the Box | Test score | Difference | -0.04 (-0.15, 0.07)  |
| Yao 2021 (CLHLS) | 11,187 | Distance to major road | 201-300 meters vs. > 300 meters (ref) | Global             | Chinese MMSE     | Test score | Difference | -0.04 (-0.26, 0.19)  |
|                  |        |                        | 101-200 meters vs. > 300 meters (ref) | Global             | Chinese MMSE     | Test score | Difference | -0.07 (-0.29, 0.15)  |
|                  |        |                        | 50-100 meters vs. > 300 meters (ref)  | Global             | Chinese MMSE     | Test score | Difference | -0.2 (-0.38, -0.01)  |
|                  |        |                        | < 50 meters vs. > 300 meters (ref)    | Global             | Chinese MMSE     | Test score | Difference | -0.18 (-0.34, -0.02) |

Abbreviations: 1000BRAINS: Cohort study of the 1000Brains population;; ALFA: Alzheimer's and Families; BC: Black Carbon;; Block-Tapping Test; CERaD: Consortium to Establish a Registry for Alzheimer's Disease; CERAD-WLMT: Consortium to Establish a Registry for Alzheimer's Disease-Word List Memory Test; CI: Confidence Interval; CLHLS: The Chinese Longitudinal Healthy Longevity Survey; ELSA-Brasil: The Brazilian Longitudinal Study of Adult Health; IQR: Interquartile RangeMMSE :Mini-Mental State Examination; MOBILIZE Boston: Maintenance of Balance, Independent Living, Intellect, and Zest in the Elderly; N: Sample Size; NAS: Veterans Affairs Normative Aging Study; NOMAS: Northern Manhattan Study; OR: Odds Ratio; PACC: Preclinical Alzheimer Cognitive Composite; PM<sub>10</sub>: Inhalable particles with diameters that are 10 µm in diameter or smaller; PM<sub>2.5</sub>: fine particulate matter less than 2.5 µm in diameter; PM<sub>2.5-10</sub>: Particulate matter with diameter between 2.5 and 10 microns;; PVFT: Phonemic Verbal Fluency Test; SALIA: Study on the Influence of Air Pollution on Lung Function, Inflammation, and Aging; SVFT: Semantic Verbal Fluency Test; TMT: Trail Making Test; VGT: Verbaler Gedächtnistest; WAIS-IV: Wechsler Adult Intelligence Scale-Fourth Edition; WHICAP: The Washington Heights-Inwood Community Aging Project; ZNS: Zahlennachsprechen.

a) Only effect estimates reporting an association between traffic and cognitive level outcomes from studies that had 3 or more strengths according to our bias assessment are included in this table. We did not transform effect estimates for associations between traffic-related air pollution and cognitive level. Instead, we report the original exposure contrast for each measure of association. If multiple associations between the same exposure and outcome were published, we reported those associations that used a continuous exposure contrast and did not adjust for potential intermediates.

**Table S6: Associations between traffic-related air pollution exposure and cognitive change in qualifying studies <sup>a</sup>**

| Paper                     | N     | Exposure                  | Cognitive domain   | Test(s)                                                                                                                                                         | Exposure Contrast                   | Difference in<br>biannual rate of<br>change |
|---------------------------|-------|---------------------------|--------------------|-----------------------------------------------------------------------------------------------------------------------------------------------------------------|-------------------------------------|---------------------------------------------|
|                           |       |                           |                    |                                                                                                                                                                 |                                     | Difference (95% CI)                         |
| Colicino 2014 (NAS)       | 387   | Black carbon              | Global             | MMSE                                                                                                                                                            | Effect of doubling BC concentration | 0.07 (-0.06, 0.19)                          |
| Kulick 2020 (NOMAS)       | 1,093 | Distance to road          | Global             | Global cognitive score                                                                                                                                          | Per IQR = 278.1 meters              | 0.00 (-0.04, 0.04)                          |
|                           |       |                           | Memory             | Modified California Verbal Learning Test                                                                                                                        | Per IQR = 278.1 meters              | 0.04 (-0.03, 0.11)                          |
|                           |       |                           | Executive function | (Color Trails 2-Color Trails 1), Controlled Oral Word Association Test, Odd Man Out, Digit Reordering                                                           | Per IQR = 278.1 meters              | 0.01 (-0.06, 0.07)                          |
|                           |       |                           | Executive function | Boston Naming Test (15-item), Animal Naming, Color Trails 2, Color Trails 1, Grooved Pegboard, Letter-Number Sequencing, Symbol Digit Modalities                | Per IQR = 278.1 meters              | -0.04 (-0.10, 0.03)                         |
| Kulick 2020 (WHICAP)      | 5,330 | Distance to road          | Global             | Global cognitive score                                                                                                                                          | Per IQR = 277.6 meters              | 0.02 (0.00, 0.03)                           |
|                           |       |                           | Memory             | Selective reminding test                                                                                                                                        | Per IQR = 277.6 meters              | 0.01 (0.00, 0.03)                           |
|                           |       |                           | Executive function | (Color Trails 2-Color Trails 1), Controlled Oral Word Association Test, Identities and Oddities; similarities subset from the Wechsler Adult Intelligence Scale | Per IQR = 277.6 meters              | -0.01 (-0.02, 0.01)                         |
|                           |       |                           | Executive function | Boston Naming Test (15-item), Animal Naming, Comprehension subtest from the Boston Diagnostic Aphasia Exam, Color Trails 2, Color Trails 1                      | Per IQR = 277.6 meters              | 0.01 (0.00, 0.02)                           |
| Tonne 2014 (Whitehall II) | 2,762 | PM <sub>2.5</sub> exhaust | Memory             | 20 word free recall list                                                                                                                                        | Per 0.27 µg/m <sup>3</sup>          | 0.00 (-0.02, 0.01)                          |
|                           |       |                           | Executive function | Semantic fluency                                                                                                                                                | Per 0.27 µg/m <sup>3</sup>          | 0.00 (-0.01, 0.01)                          |
|                           |       |                           | Executive function | Phonemic fluency                                                                                                                                                | Per 0.27 µg/m <sup>3</sup>          | 0.00 (-0.01, 0.01)                          |
|                           |       | PM <sub>10</sub> exhaust  | Executive function | Alice Heim 4-I test                                                                                                                                             | Per 0.27 µg/m <sup>3</sup>          | 0.00 (-0.01, 0.00)                          |
|                           |       |                           | Memory             | 20 word free recall list                                                                                                                                        | Per 0.3 µg/m <sup>3</sup>           | 0.00 (-0.02, 0.01)                          |

|                    |                     |                                  |                    |
|--------------------|---------------------|----------------------------------|--------------------|
| Executive function | Semantic fluency    | Per 0.3 $\mu\text{g}/\text{m}^3$ | 0.00 (-0.01, 0.01) |
| Executive function | Phonemic fluency    | Per 0.3 $\mu\text{g}/\text{m}^3$ | 0.00 (-0.01, 0.01) |
| Executive function | Alice Heim 4-I test | Per 0.3 $\mu\text{g}/\text{m}^3$ | 0.00 (-0.01, 0.00) |

---

Abbreviations: BC: Black Carbon; CI: Confidence Interval; IQR: Interquartile Range; MMSE :Mini-Mental State Examination; N: Sample Size; NAS: Veterans Affairs Normative Aging Study; NOMAS: Northern Manhattan Study; PM<sub>10</sub>: Inhalable particles with diameters that are 10  $\mu\text{m}$  in diameter or smaller; PM<sub>2.5</sub>: fine particulate matter less than 2.5  $\mu\text{m}$  in diameter; WHICAP: The Washington Heights-Inwood Community Aging Project;

a) Only effect estimates reporting an association between traffic-related air pollution exposure and cognitive change outcomes from studies that had 3 or more strengths according to our bias assessment are included in this table. We transformed effect estimates to represent biannual cognitive change, but performed no further manipulations to align effect estimates to common exposure contrasts or outcome units. If multiple associations between the same exposure and outcome were published, we reported those associations that used a continuous exposure contrast and did not adjust for potential intermediates.

**Table S7: Associations between traffic-related air pollution exposure and incident dementia/cognitive impairment in qualifying studies <sup>a</sup>**

| Paper                                 | N                 | Cases       | Dementia outcome                                 | Measured using medical records? | Measure of association | Exposure                            | Exposure contrast     | Estimate (95%CI)  |
|---------------------------------------|-------------------|-------------|--------------------------------------------------|---------------------------------|------------------------|-------------------------------------|-----------------------|-------------------|
| Cerza 2019 (Rome Longitudinal Cohort) | 350,844           | 21,548      | Hospitalization for all-cause dementia           | Y                               | HR                     | PM <sub>2.5</sub> absorbance        | 1 10 <sup>-5</sup> /m | 1.00 (0.98, 1.03) |
|                                       |                   | 7,671       | Hospitalization for Alzheimer's disease dementia | Y                               | HR                     | PM <sub>2.5</sub> absorbance        | 1 10 <sup>-5</sup> /m | 0.91 (0.86, 0.96) |
|                                       |                   | 21,548      | Hospitalization for all-cause dementia           | Y                               | HR                     | Distance to high traffic road       | <50 meters            | 1.01 (0.97, 1.06) |
|                                       |                   |             |                                                  |                                 |                        |                                     | 50-100 meters         | 0.98 (0.93, 1.02) |
|                                       |                   |             |                                                  |                                 |                        |                                     | 101-200 meters        | 0.99 (0.95, 1.03) |
|                                       |                   |             |                                                  |                                 |                        |                                     | 201-300 meters        | 1.00 (0.95, 1.04) |
|                                       |                   | >300 meters | 1 (ref)                                          |                                 |                        |                                     |                       |                   |
|                                       |                   | 7,671       | Hospitalization for Alzheimer's disease dementia | Y                               | HR                     | Distance to high traffic road       | <50 meters            | 0.97 (0.90, 1.04) |
|                                       |                   |             |                                                  |                                 |                        |                                     | 50-100 meters         | 0.96 (0.89, 1.04) |
|                                       |                   |             |                                                  |                                 |                        |                                     | 101-200 meters        | 0.99 (0.92, 1.05) |
| 201-300 meters                        | 1.00 (0.93, 1.08) |             |                                                  |                                 |                        |                                     |                       |                   |
| >300 meters                           | 1 (ref)           |             |                                                  |                                 |                        |                                     |                       |                   |
| Oudin 2018 (Betula)                   | 1,806             | 302         | All-cause dementia                               | Partially                       | HR                     | PM <sub>2.5</sub> (traffic exhaust) | 1 µg/m <sup>3</sup>   | 1.14 (0.59, 2.23) |
| Paul 2020 (SALSA)                     | 1,564             | 100         | All-cause dementia                               | N                               | HR                     | TRAP-NO <sub>x</sub>                | 2.31 ppb              | 1.20 (0.98, 1.47) |
|                                       |                   | 67          | Cognitive impairment-not dementia                | N                               | HR                     | TRAP-NO <sub>x</sub>                | 2.31 ppb              | 1.21 (1.00, 1.46) |

Abbreviations: CI: Confidence Interval; HR: Hazard Ratio; N: Sample Size; NO<sub>x</sub>: Oxides of Nitrogen; PM<sub>2.5</sub>: fine particulate matter less than 2.5 µm in diameter;; ppb: Parts per billion; ref: Reference; SALSA: The Sacramento Are Latino Study on Aging; TRAP: Traffic-Related Air Pollution;

a) Only effect estimates reporting an association between traffic-related air pollution and incident dementia/cognitive impairment from studies that had 3 or more strengths according to our bias assessment are included in this table. We did not transform effect estimates for associations between traffic-related air pollution and incident

dementia/cognitive impairment. Instead, we report the original exposure contrast for each measure of association. If multiple associations between the same exposure and outcome were published, we reported those associations that used a continuous exposure contrast and did not adjust for potential intermediates.

**Table S8: Associations between traffic-related air pollution exposure and neuroimaging outcomes in qualifying studies<sup>a</sup>**

| Paper                     | N     | Outcome measure                                               | Outcome Type | Measure of association           | Exposure                     | Exposure contrast        | Estimate (95% CI)       |
|---------------------------|-------|---------------------------------------------------------------|--------------|----------------------------------|------------------------------|--------------------------|-------------------------|
| Crous-Bou 2020 (ALFA)     | 228   | Hippocampal volume                                            | Volumetric   | Difference (in mm <sup>3</sup> ) | PM <sub>2.5</sub> absorbance | Per 1 µg/m <sup>3</sup>  | -61.9 (-241.24, 117.44) |
|                           |       | Ventricles volume                                             |              | Difference (in mm <sup>3</sup> ) | PM <sub>2.5</sub> absorbance | Per 1 µg/m <sup>3</sup>  | 1.83 (-11.99, 15.65)    |
|                           |       | AD signature cortical thickness                               |              | Difference                       | PM <sub>2.5</sub> absorbance | Per 1 µg/m <sup>3</sup>  | -0.65 (-1.49, 0.19)     |
| Kulick 2017 (NOMAS)       | 1,075 | Total cerebral volume / total intracranial volume             | Volumetric   | Difference                       | Log-distance to road         | 256.97 meters            | -0.10 (-0.30, 0.10)     |
| Nußbaum 2020 (1000BRAINS) | 590   | Left hemisphere dorsolateral prefrontal cortex IGI            | Volumetric   | Difference                       | PM <sub>2.5</sub> absorbance | 0.3 µg/m <sup>3</sup>    | 0.00 (-0.02, 0.01)      |
|                           |       | Left hemisphere inferior parietal lobule IGI                  |              | Difference                       | PM <sub>2.5</sub> absorbance | 0.3 µg/m <sup>3</sup>    | 0.00 (-0.01, 0.02)      |
|                           |       | Left hemisphere posterior cingulate cortex and precuneus IGI  |              | Difference                       | PM <sub>2.5</sub> absorbance | 0.3 µg/m <sup>3</sup>    | -0.01 (-0.03, 0.01)     |
|                           |       | Right hemisphere dorsolateral prefrontal cortex IGI           |              | Difference                       | PM <sub>2.5</sub> absorbance | 0.3 µg/m <sup>3</sup>    | 0.00 (-0.02, 0.01)      |
|                           |       | Right hemisphere inferior parietal lobule IGI                 |              | Difference                       | PM <sub>2.5</sub> absorbance | 0.3 µg/m <sup>3</sup>    | -0.01 (-0.02, 0.01)     |
|                           |       | Right hemisphere posterior cingulate cortex and precuneus IGI |              | Difference                       | PM <sub>2.5</sub> absorbance | 0.3 µg/m <sup>3</sup>    | -0.01 (-0.03, 0.01)     |
|                           |       | Left hemisphere dorsolateral prefrontal cortex IGI            |              | Difference                       | Distance to major road       | 100-200 vs. ≥ 200 meters | -0.01 (-0.06, 0.04)     |
|                           |       | Left hemisphere inferior parietal lobule IGI                  |              | Difference                       | Distance to major road       | 100-200 vs. ≥ 200 meters | -0.04 (-0.09, 0.01)     |
|                           |       | Left hemisphere posterior cingulate cortex and precuneus IGI  |              | Difference                       | Distance to major road       | 100-200 vs. ≥ 200 meters | 0.00 (-0.07, 0.07)      |
|                           |       | Right hemisphere dorsolateral prefrontal cortex IGI           |              | Difference                       | Distance to major road       | 100-200 vs. ≥ 200 meters | -0.06 (-0.12, -0.01)    |
|                           |       | Right hemisphere inferior parietal lobule IGI                 |              | Difference                       | Distance to major road       | 100-200 vs. ≥ 200 meters | -0.02 (-0.08, 0.04)     |
|                           |       | Right hemisphere posterior cingulate cortex and precuneus IGI |              | Difference                       | Distance to major road       | 100-200 vs. ≥ 200 meters | -0.07 (-0.13, 0.00)     |

|                     |       |                                                                    |                 |            |                        |                                     |                     |
|---------------------|-------|--------------------------------------------------------------------|-----------------|------------|------------------------|-------------------------------------|---------------------|
|                     |       | Left hemisphere dorsolateral prefrontal cortex IGI                 |                 | Difference | Distance to major road | <100 vs. $\geq$ 200 meters          | -0.03 (-0.09, 0.02) |
|                     |       | Left hemisphere inferior parietal lobule IGI                       |                 | Difference | Distance to major road | <100 vs. $\geq$ 200 meters          | 0.00 (-0.06, 0.06)  |
|                     |       | Left hemisphere posterior cingulate cortex and precuneus IGI       |                 | Difference | Distance to major road | <100 vs. $\geq$ 200 meters          | -0.03 (-0.10, 0.05) |
|                     |       | Right hemisphere dorsolateral prefrontal cortex IGI                |                 | Difference | Distance to major road | <100 vs. $\geq$ 200 meters          | -0.02 (-0.08, 0.04) |
|                     |       | Right hemisphere inferior parietal lobule IGI                      |                 | Difference | Distance to major road | <100 vs. $\geq$ 200 meters          | 0.00 (-0.07, 0.06)  |
|                     |       | Right hemisphere posterior cingulate cortex and precuneus IGI      |                 | Difference | Distance to major road | <100 vs. $\geq$ 200 meters          | -0.01 (-0.09, 0.06) |
| Wilker 2015 (FOS)   | 865   | Hippocampal volume                                                 | Volumetric      | Difference | Log(distance) to road  | 367 meters                          | -0.00 (-0.01, 0.00) |
|                     | 873   | Total cerebral brain volume                                        |                 | Difference | Log(distance) to road  | 367 meters                          | -0.15 (-0.41, 0.11) |
| Wilker 2016 (MADRC) | 202   | Brain parenchymal fraction                                         | Volumetric      | Difference | Log-distance to road   | <50 vs. >400 meters from major road | 0.04 (-0.46, 0.54)  |
| Kulick 2017 (NOMAS) | 1,075 | Presence of subclinical brain infarct                              | Cerebrovascular | OR         | Log-distance to road   | 256.97 meters                       | 1.06 (0.89, 1.26)   |
|                     |       | Log-white matter hyperintensity volume / total intracranial volume |                 | Difference | Log-distance to road   | 256.97 meters                       | 0.11 (-0.38, 0.06)  |
| Wilker 2015 (FOS)   | 870   | Covert brain infarcts                                              | Cerebrovascular | OR         | Log(distance) to road  | 367 meters                          | 1.05 (0.79, 1.40)   |
|                     | 873   | Excessive white matter hyperintensity volume for age               |                 | OR         | Log(distance) to road  | 367 meters                          | 1.11 (0.84, 1.48)   |
|                     | 873   | Log (white matter hyperintensities)                                |                 | Difference | Log(distance) to road  | 367 meters                          | 0.10 (0.01, 0.19)   |
| Wilker 2016 (MADRC) | 236   | Log white matter hyperintensities                                  | Cerebrovascular | Difference | Log-distance to road   | <50 vs. >400 meters from major road | -0.13 (-0.31, 0.04) |
|                     | 236   | Microbleed presence                                                |                 | OR         | Log-distance to road   | <50 vs. >400 meters from major road | 0.89 (0.58, 1.39)   |

Abbreviations: 1000BRAINS: Cohort study of the 1000Brains population; AD: Alzheimer's Disease;; ALFA: ALzheimer's and FAMilies; CI: Confidence Interval; FOS: Framingham Offspring Study; IGI: Local Gyrfication Index; mm<sup>3</sup>: cubic millimeters; MADRC: Massachusetts's Alzheimer's Disease Research Center; OR: Odds Ratio; PM<sub>2.5</sub>: fine particulate matter less than 2.5  $\mu$ m in diameter;

- a) Only effect estimates reporting an association between traffic-related air pollution and neuroimaging outcomes from studies that had 3 or more strengths according to our bias assessment are included in this table. We did not transform effect estimates for associations with neuroimaging outcomes. Instead, we report the original exposure contrast for each measure of association. If multiple associations between the same exposure and outcome were published, we reported those associations that used a continuous exposure contrast and did not adjust for potential intermediates.



**Figure S1. Flowchart for identification of eligible articles for inclusion in this systematic review**

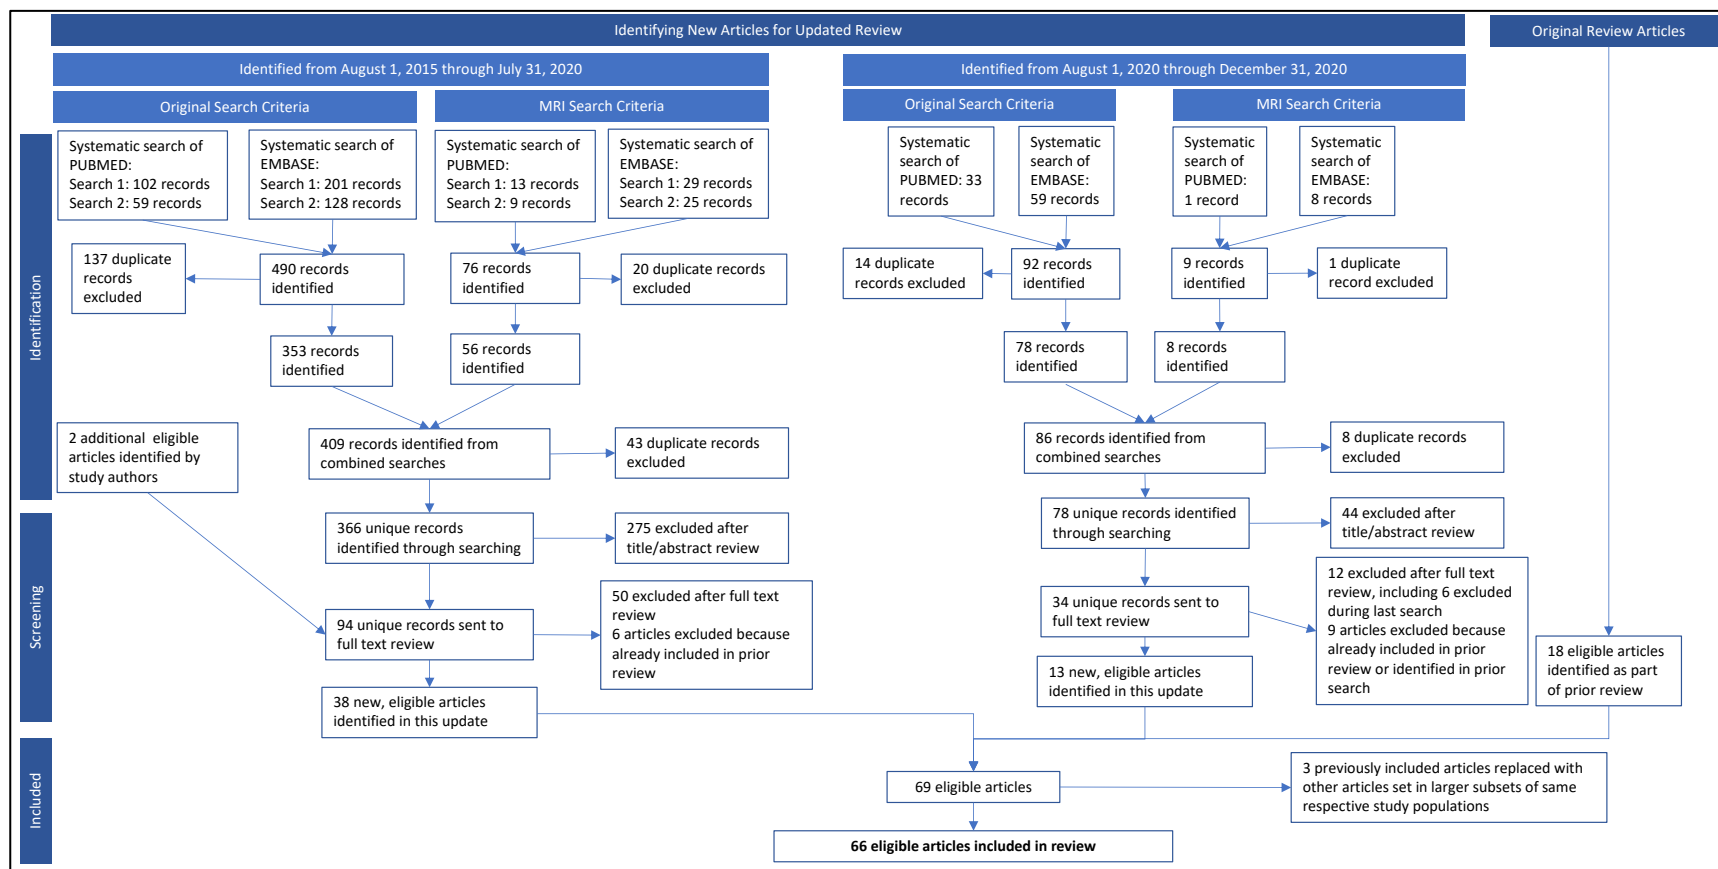

**Figure S2: Associations between NO<sub>2</sub> exposure and cognitive level in qualifying studies**

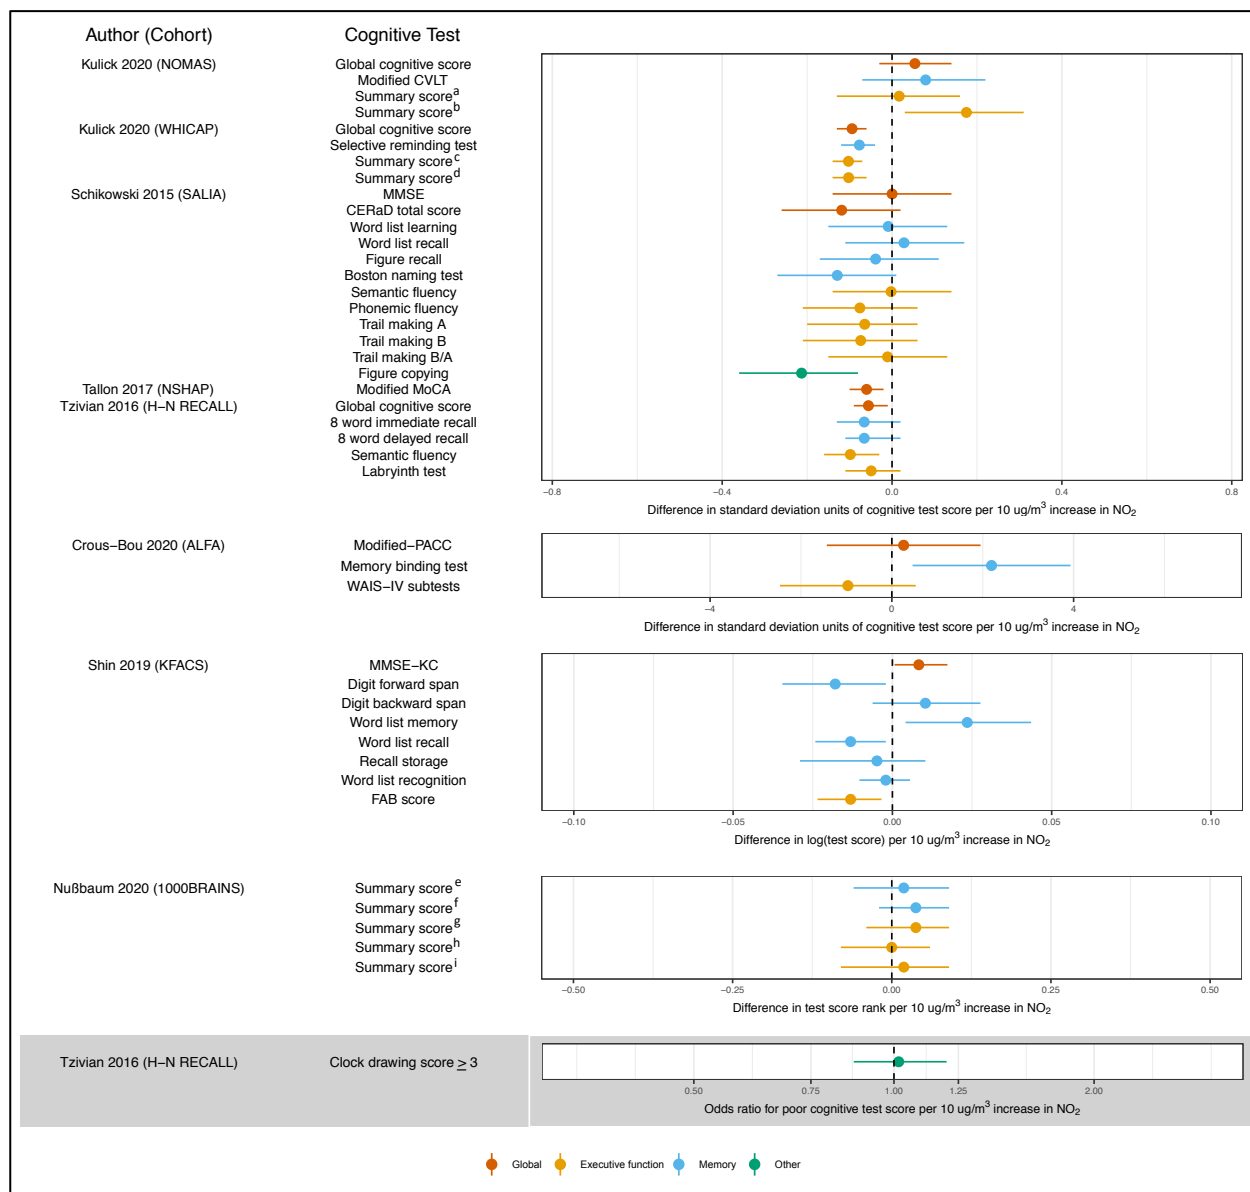

Abbreviations: CERaD, Consortium to Establish a Registry for Alzheimer’s Disease; CVLT, California Verbal Learning Test; FAB, frontal assessment battery; H-N RECALL, Heinz Nixdorf Risk factors, Evaluation of Coronary Calcium and Lifestyle study; KFACS, Korean Frailty and Aging Cohort Study; MMSE, Mini-Mental State Exam; MMSE-KC, Mini-Mental State Exam – Korean version; MoCA, Montreal Cognitive Assessment; NO<sub>2</sub>, nitrogen dioxides; NOMAS, Northern Manhattan Study; NSHAP, National Social Health and Aging Study; SALIA, Study on the Influence of Air Pollution on Lung Function, Inflammation, and Aging; WHICAP, Washington Heights-Inwood Community Aging Project.

Only effect estimates from studies that had 3 or more strengths according to our bias assessment are included in this figure. Dots represent effect estimates, and bars represent 95% confidence intervals. For subplots with white backgrounds, effect estimates to the left of the null line represent harmful effects. For subplots with grey backgrounds, effect estimates to the right of the null line represent harmful effects. Wherever possible, reported associations were transformed to be on a common scale (e.g. SD units per 10  $\mu\text{g}/\text{m}^3$  increase). In order to aid assessment of domain-specific effects, we classified each test as examining global cognition, executive function, memory, indicated by the color-coding of the point estimate and 95% confidence interval.

Tests included in summary scores include:

- a) (Color Trails 2-Color Trails 1), Controlled Oral Word Association Test, Odd Man Out, Digit Reordering

- b) Boston Naming Test (15-item), Animal Naming, Color Trails 2, Color Trails 1, Grooved Pegboard, Letter-Number Sequencing, Symbol Digit Modalities
- c) (Color Trails 2-Color Trails 1), Controlled Oral Word Association Test, Identities and Oddities; similarities subset from the Wechsler Adult Intelligence Scale
- d) Boston Naming Test (15-item), Animal Naming, Comprehension subtest from the Boston Diagnostic Aphasia Exam, Color Trails 2, Color Trails 1
- e) Benton figural memory test; Verbaler Gedächtnistest (VGT) verbal learning test; VGT delayed
- f) Visual-Pattern-test; Block-tapping test (BTT) forwards; BTT backwards; Zahlennachsprechen (ZNS) verbal memory test forwards; ZNS backwards
- g) Subtest 3 of "Leistungsprüfungssystem 50+", problem solving test; Fünf-Punkte figural fluency test; Trail making test B-A; Color-Word Interference Test
- h) Regensburger Wortflüssigkeitstest phonemic fluency and semantic fluency tests; Wortschatztest vocabulary test
- i) Alters-Konzentrations selective attention test; Trail Making test (part A)

**Figure S3: Associations between PM<sub>2.5</sub> exposure and cognitive level in qualifying studies**

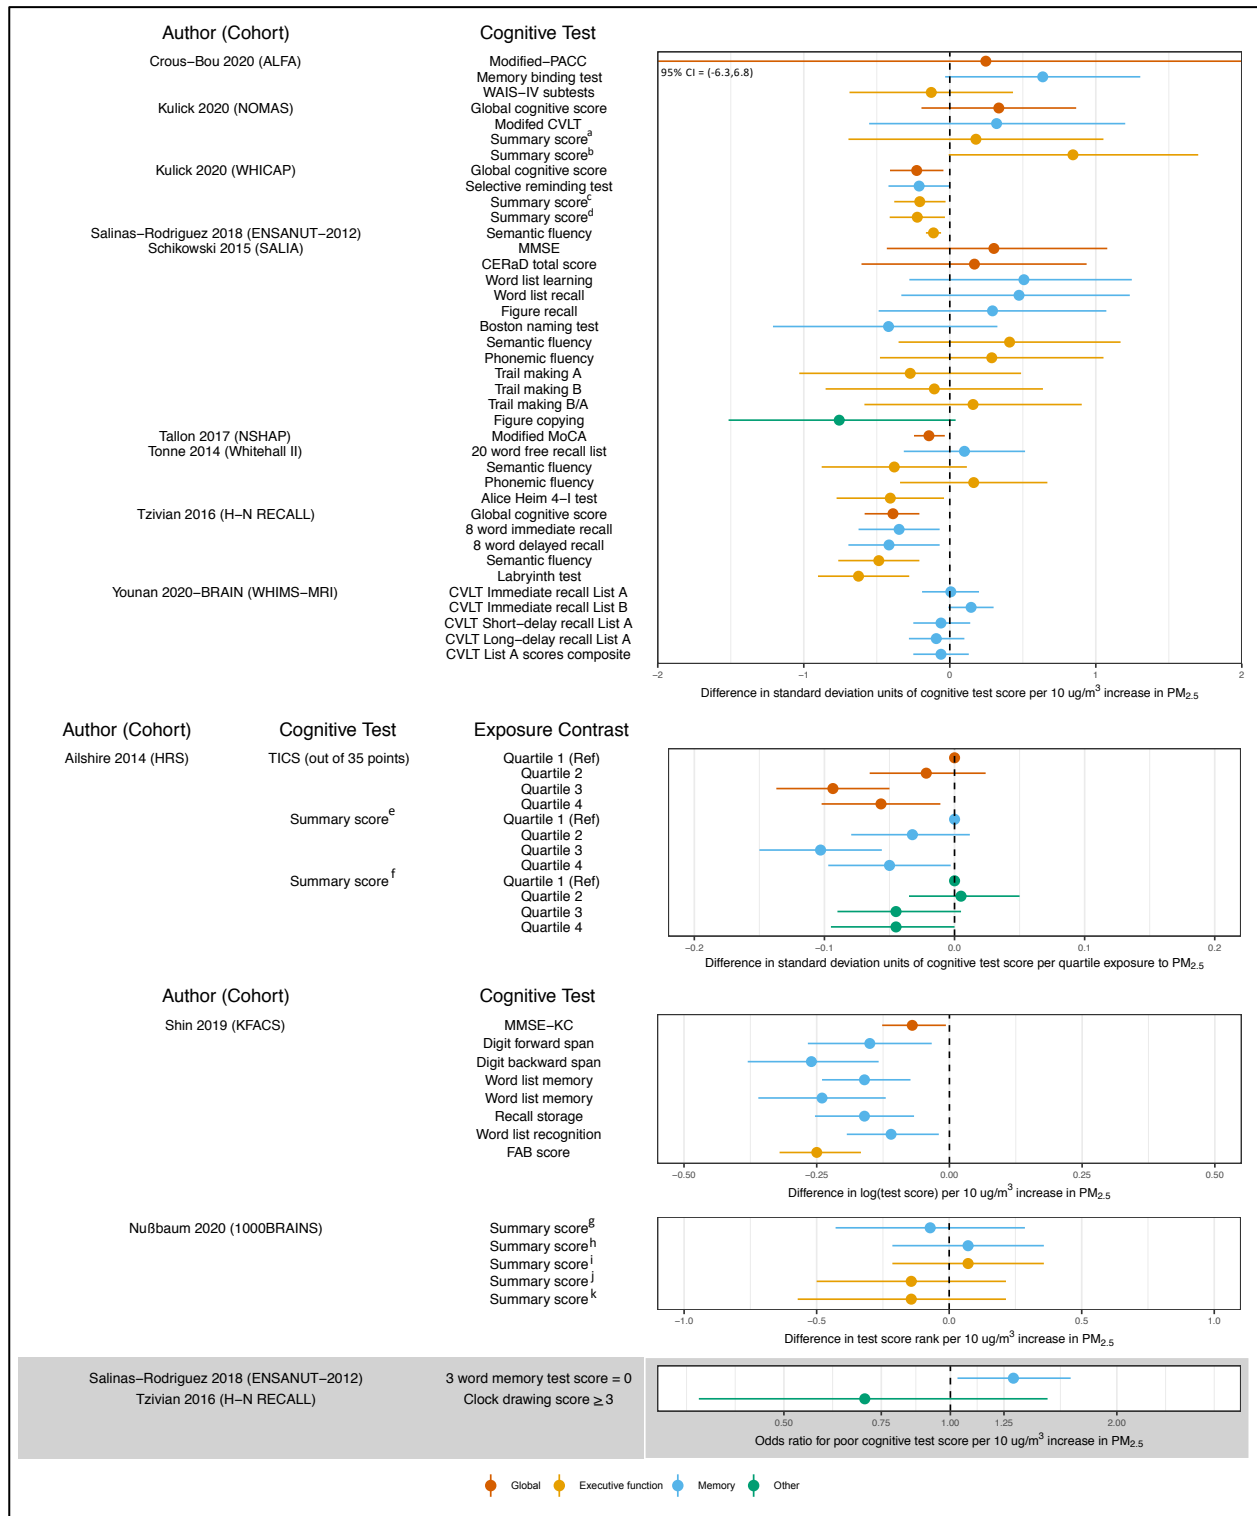

Only effect estimates from studies that had 3 or more strengths according to our bias assessment are included in this figure. Dots represent effect estimates, and bars represent 95% confidence intervals. For subplots with white backgrounds, effect estimates to the left of the null line represent harmful associations. For subplots with grey backgrounds, effect estimates to the right of the null line represent harmful associations. Wherever

possible, reported associations were transformed to be on a common scale (e.g. SD units per 10  $\mu\text{g}/\text{m}^3$  increase of  $\text{PM}_{2.5}$ ). In order to aid assessment of domain-specific effects, we classified each test as examining global cognition, executive function, memory, indicated by the color-coding of the point estimate and 95% confidence interval.

Abbreviations: ALFA, Alzheimer's and Family; CERAD, Consortium to Establish a Registry for Alzheimer's Disease; CVLT, California Verbal Learning Test; ENSANUT-2012, Spanish acronym for National Survey of Health and Nutrition in Mexico in 2012; FAB, frontal assessment battery; H-N RECALL, Heinz Nixdorf Risk factors, Evaluation of Coronary Calcium and Lifestyle study; HRS, Health and Retirement Study; KFACS, Korean Frailty and Aging Cohort Study; MMSE, Mini-Mental State Exam; MMSE-KC, Mini-Mental State Exam – Korean version; MoCA, Montreal Cognitive Assessment; NOMAS, Northern Manhattan Study; NSHAP, National Social Health and Aging Study; PACC, Preclinical Alzheimer Cognitive Composite;  $\text{PM}_{2.5}$ , particulate matter with an aerodynamic diameter  $< 2.5$  micrometers; Ref, reference; SALIA, Study on the Influence of Air Pollution on Lung Function, Inflammation, and Aging; TICS, Telephone Interview for Cognitive Status; WAIS-IV, Wechsler Adult Intelligence Scale 4<sup>th</sup> edition; WHICAP, Washington Heights-Inwood Community Aging Project; WHIMS-MRI, Women's Health Initiative Memory Study - MRI.

Tests included in summary scores include:

- a) (Color Trails 2-Color Trails 1), Controlled Oral Word Association Test, Odd Man Out, Digit Reordering
- b) Boston Naming Test (15-item), Animal Naming, Color Trails 2, Color Trails 1, Grooved Pegboard, Letter-Number Sequencing, Symbol Digit Modalities
- c) (Color Trails 2-Color Trails 1), Controlled Oral Word Association Test, Identities and Oddities; similarities subset from the Wechsler Adult Intelligence Scale
- d) Boston Naming Test (15-item), Animal Naming, Comprehension subtest from the Boston Diagnostic Aphasia Exam, Color Trails 2, Color Trails 1
- e) Sum of immediate and delayed recall scores from TICS
- f) Sum of all scores from the TICS excluding immediate and delayed recall
- g) Benton figural memory test; Verbaler Gedächtnistest (VGT) verbal learning test; VGT delayed
- h) Visual-Pattern-test; Block-tapping test (BTT) forwards; BTT backwards; Zahlennachsprechen (ZNS) verbal memory test forwards; ZNS backwards
- i) Subtest 3 of "Leistungsprüfungssystem 50+", problem solving test; Fünf-Punkte figural fluency test; Trail making test B-A; Color-Word Interference Test
- j) Regensburger Wortflüssigkeitstest phonemic fluency and semantic fluency tests; Wortschatztest vocabulary test
- k) Alters-Konzentrations selective attention test; Trail Making test (part A)

**Figure S4: Associations between PM<sub>2.5</sub> exposure and cognitive change in qualifying studies**

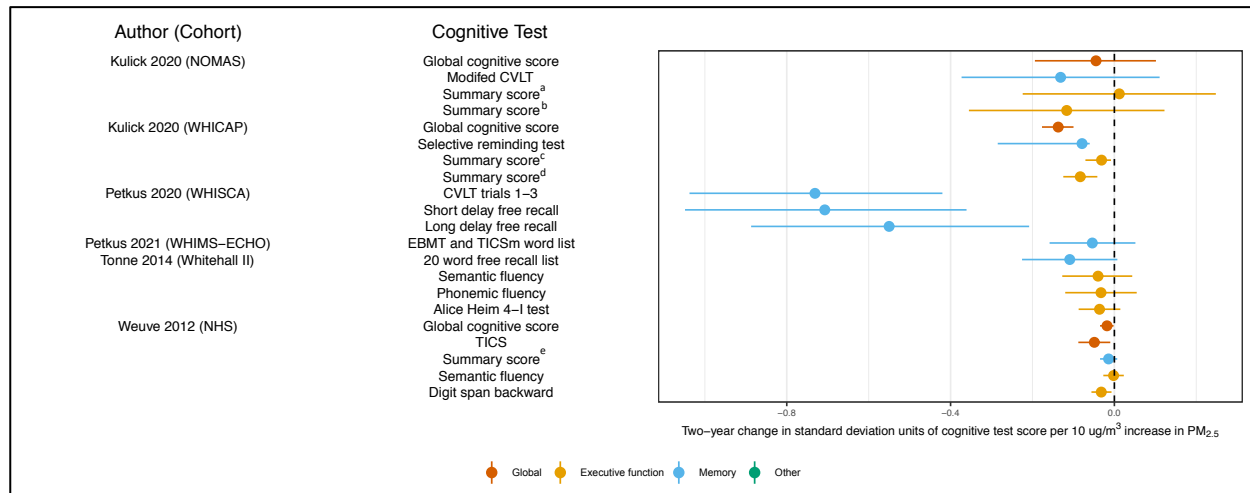

Only effect estimates from studies that had 3 or more strengths according to our bias assessment are included in this figure. Dots represent effect estimates, and bars represent 95% confidence intervals. For subplots with white backgrounds, effect estimates to the left of the null line represent harmful effects. For subplots with grey backgrounds, effect estimates to the right of the null line represent harmful effects. Wherever possible, reported associations were transformed to be on a common scale (e.g. excess change in SD units per 10 µg/m<sup>3</sup> increase). In order to aid assessment of domain-specific effects, we classified each test as examining global cognition, executive function, memory, indicated by the color-coding of the point estimate and 95% confidence interval.

Abbreviations: CVLT, California Verbal Learning Test; EBMT, East Boston Memory Test; NHS, Nurses' Health Study; NOMAS, Northern Manhattan Study; PM<sub>2.5</sub>, particulate matter with an aerodynamic diameter < 2.5 micrometers; TICS, Telephone Interview for Cognitive Status; TICSm, modified Telephone Interview for Cognitive Status; WHICAP, Washington Heights-Inwood Community Aging Project; WHISCA, Women's Health Initiative Study of Cognitive Aging; WHIMS-ECHO, Women's Health Initiative Memory Study of the Epidemiology of Cognitive Health Outcomes.

Tests included in summary scores include:

- (Color Trails 2-Color Trails 1), Controlled Oral Word Association Test, Odd Man Out, Digit Reordering
- Boston Naming Test (15-item), Animal Naming, Color Trails 2, Color Trails 1, Grooved Pegboard, Letter-Number Sequencing, Symbol Digit Modalities
- (Color Trails 2-Color Trails 1), Controlled Oral Word Association Test, Identities and Oddities; similarities subset from the Wechsler Adult Intelligence Scale
- Boston Naming Test (15-item), Animal Naming, Comprehension subtest from the Boston Diagnostic Aphasia Exam, Color Trails 2, Color Trails 1
- Composite of immediate/delayed recall from East Boston Memory Test and TICS 10-word list

**Figure S5: Associations between PM<sub>2.5</sub> exposure and MRI volumetric outcomes in qualifying studies**

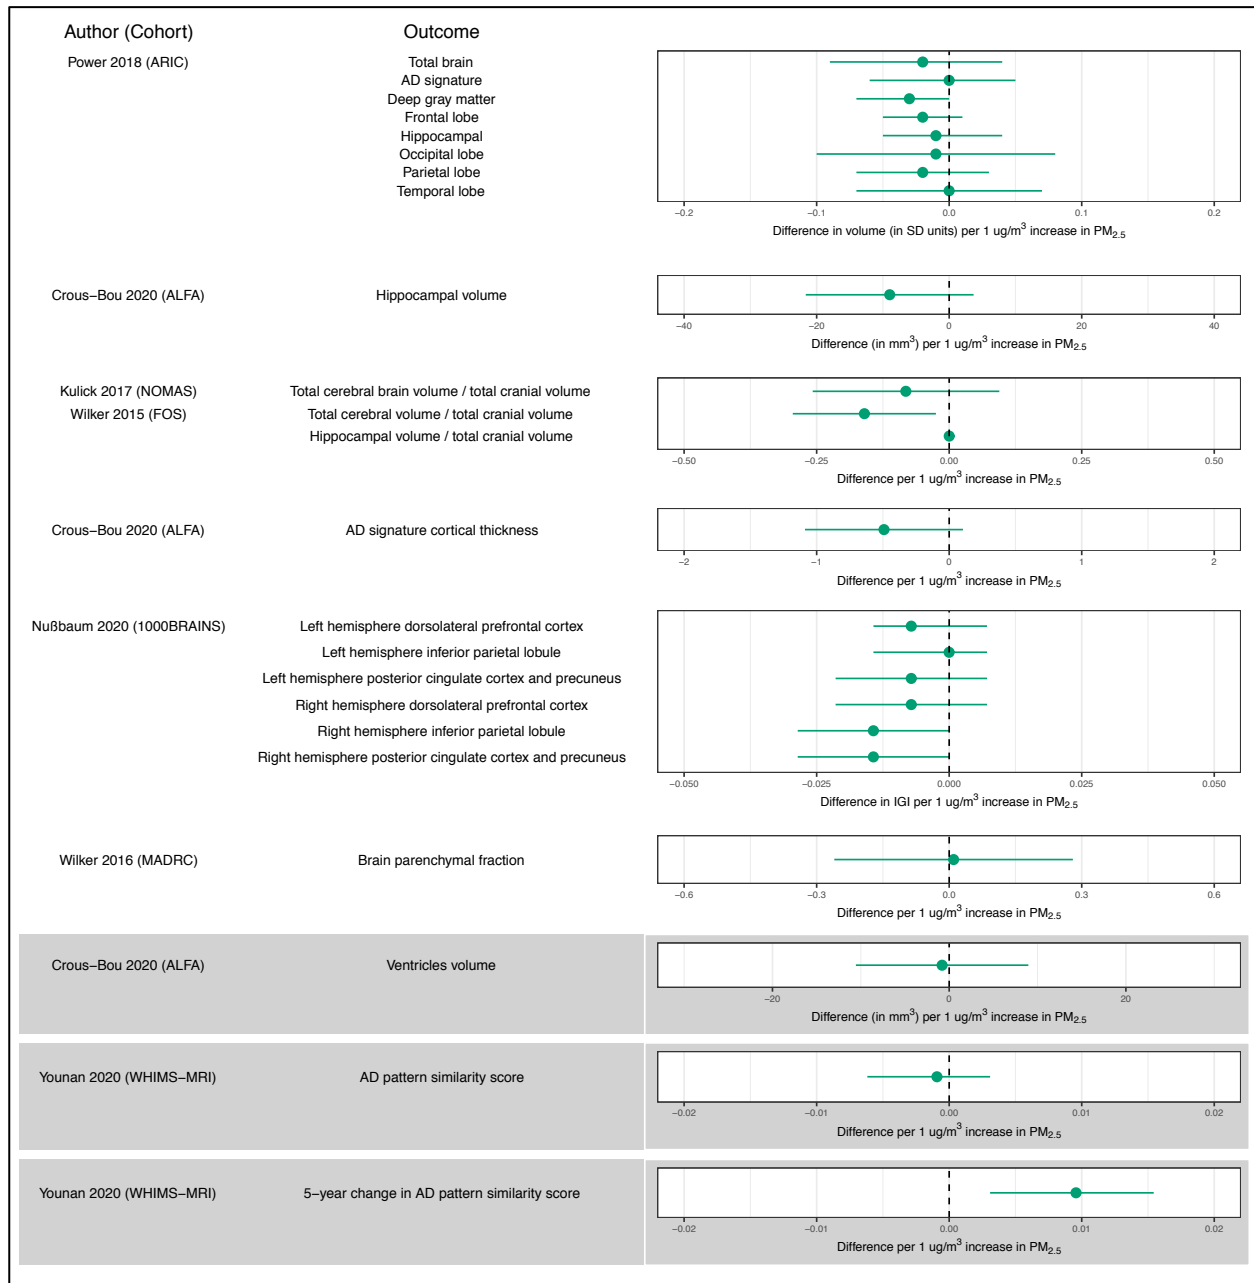

Only effect estimates from studies that had 3 or more strengths according to our bias assessment are included in this figure. Dots represent effect estimates, and bars represent 95% confidence intervals. For subplots with white backgrounds, effect estimates to the left of the null line represent harmful effects. For subplots with grey backgrounds, effect estimates to the right of the null line represent harmful effects.

Abbreviations: AD, Alzheimer’s disease; ALFA, Alzheimer’s and Family; ARIC, Atherosclerosis Risk in Communities; FOS, Framingham Offspring Study; IGI, local gyrification index; MADRC, Massachusetts Alzheimer’s Disease Research Center Longitudinal Cohort; NOMAS, Northern Manhattan Study; PM<sub>2.5</sub>, particulate matter with an aerodynamic diameter < 2.5 micrometers; SD, standard deviation; WHIMS-MRI, Women’s Health Initiative Memory Study.

**Figure S6: Associations between PM<sub>2.5</sub> exposure and MRI cerebrovascular outcomes in qualifying studies**

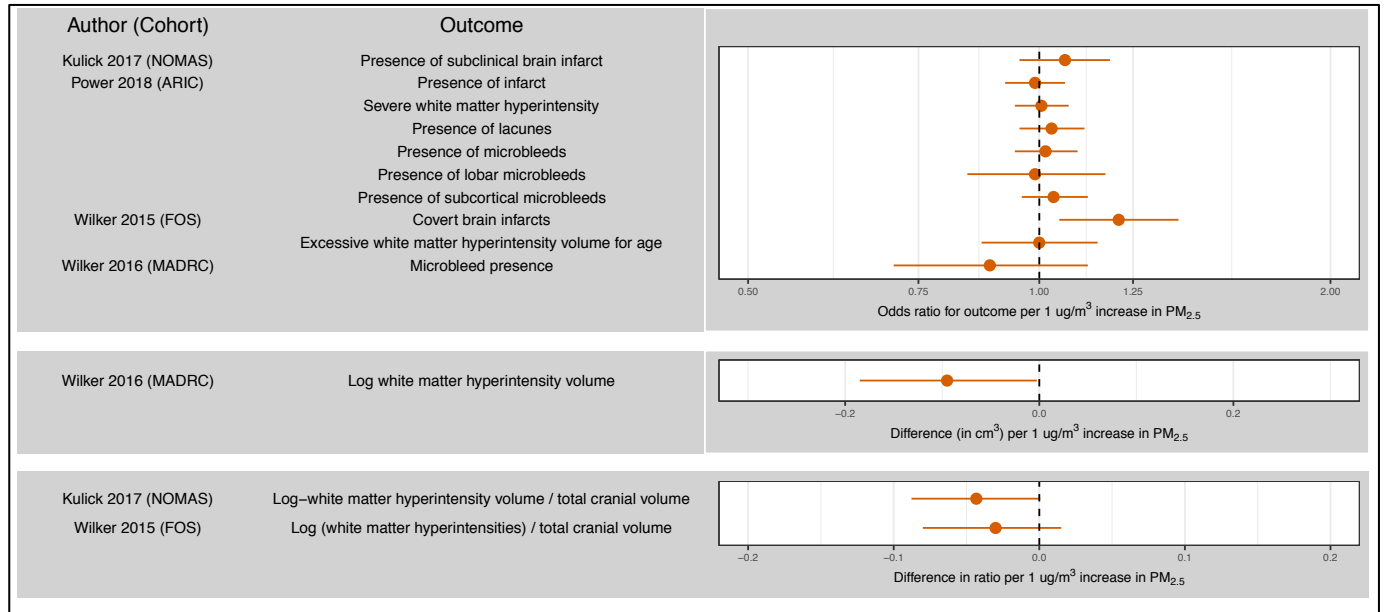

Only effect estimates from studies that had 3 or more strengths according to our bias assessment are included in this figure. Dots represent effect estimates, and bars represent 95% confidence intervals. For subplots with white backgrounds, effect estimates to the left of the null line represent harmful effects. For subplots with grey backgrounds, effect estimates to the right of the null line represent harmful effects.

Abbreviations: AD, Alzheimer's disease; ALFA, Alzheimer's and Family; ARIC, Atherosclerosis Risk in Communities; FOS, Framingham Offspring Study; IGI, local gyrfication index; MADRC, Massachusetts Alzheimer's Disease Research Center Longitudinal Cohort; NOMAS, Northern Manhattan Study; PM<sub>2.5</sub>, particulate matter with an aerodynamic diameter < 2.5 micrometers; SD, standard deviation; WHIMS, Women's Health Initiative Memory Study



**Figure S7: Associations between PM<sub>10</sub> exposure and cognitive level in qualifying studies**

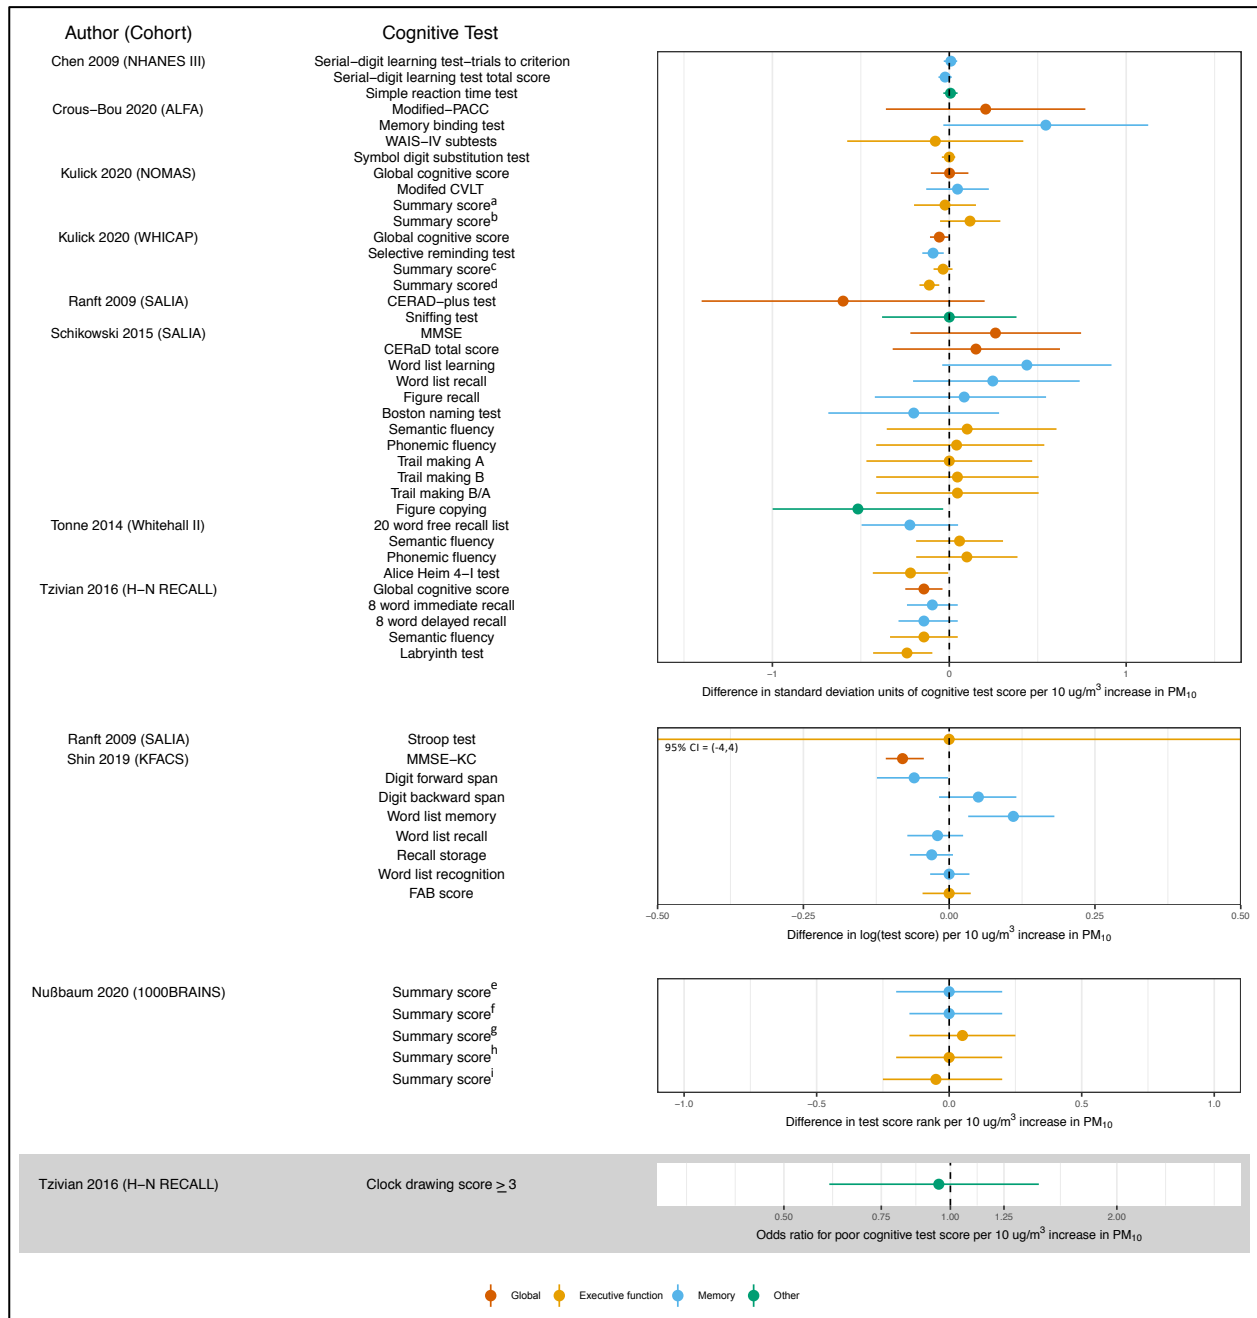

Only effect estimates from studies that had 3 or more strengths according to our bias assessment are included in this figure. Dots represent effect estimates, and bars represent 95% confidence intervals. For subplots with white backgrounds, effect estimates to the left of the null line represent harmful associations. For subplots with grey backgrounds, effect estimates to the right of the null line represent harmful associations.

Wherever possible, reported associations were transformed to be on a common scale (e.g. SD units per 10  $\mu\text{g}/\text{m}^3$  increase). In order to aid assessment of domain-specific effects, we classified each test as examining global cognition, executive function, memory, indicated by the color-coding of the point estimate and 95% confidence interval.

Abbreviations: ALFA, Alzheimer's and Family; CERAD, Consortium to Establish a Registry for Alzheimer's Disease; CI, confidence interval; CVLT, California Verbal Learning Test; FAB, frontal assessment battery; H-N RECALL, Heinz Nixdorf Risk factors, Evaluation of Coronary Calcium and Lifestyle study; KFACS, Korean Frailty and Aging Cohort Study; MMSE, Mini-Mental State Exam; MMSE-KC, Mini-Mental State Exam - Korean version; NHANES III, Third National Health and Nutrition Examination Survey; NOMAS, Northern Manhattan Study; PACC,

Preclinical Alzheimer Cognitive Composite; PM10, particulate matter with an aerodynamic diameter < 10 micrometers; SALIA, Study on the Influence of Air Pollution on Lung Function, Inflammation, and Aging; WAIS-IV, Wechsler Adult Intelligence Scale 4<sup>th</sup> edition; WHICAP, Washington Heights-Inwood Community Aging Project.

Tests included in summary scores include:

- a) (Color Trails 2-Color Trails 1), Controlled Oral Word Association Test, Odd Man Out, Digit Reordering
- b) Boston Naming Test (15-item), Animal Naming, Color Trails 2, Color Trails 1, Grooved Pegboard, Letter-Number Sequencing, Symbol Digit Modalities
- c) (Color Trails 2-Color Trails 1), Controlled Oral Word Association Test, Identities and Oddities; similarities subset from the Wechsler Adult Intelligence Scale
- d) Boston Naming Test (15-item), Animal Naming, Comprehension subtest from the Boston Diagnostic Aphasia Exam, Color Trails 2, Color Trails 1
- e) Benton figural memory test; Verbaler Gedächtnistest (VGT) verbal learning test; VGT delayed
- f) Visual-Pattern-test; Block-tapping test (BTT) forwards; BTT backwards; Zahlennachsprechen (ZNS) verbal memory test forwards; ZNS backwards
- g) Subtest 3 of "Leistungsprüfungssystem 50+", problem solving test; Fünf-Punkte figural fluency test; Trail making test B-A; Color-Word Interference Test
- h) Regensburger Wortflüssigkeitstest phonemic fluency and semantic fluency tests; Wortschatztest vocabulary test
- i) Alters-Konzentrations selective attention test; Trail Making test (part A)
