# Supplementary material
Source: PubMed Central journal article supplement (PMC8462495)
Supplement: ehp8716.smcontents.508.pdf [file ehp8716.smcontents.508.pdf]

**Note to readers with disabilities:** *EHP* strives to ensure that all journal content is accessible to all readers. However, some figures and Supplemental Material published in *EHP* articles may not conform to [508 standards](#) due to the complexity of the information being presented. If you need assistance accessing journal content, please contact [ehp508@niehs.nih.gov](mailto:ehp508@niehs.nih.gov). Our staff will work with you to assess and meet your accessibility needs within 3 working days.

### **Supplemental Material**

#### **Exposure to Air Pollution in Relation to Risk of Dementia and Related Outcomes: An Updated Systematic Review of the Epidemiological Literature**

Jennifer Weuve, Erin E. Bennett, Lysie Ranker, Kan Z. Gianattasio, Meredith Pedde, Sara D. Adar, Jeff D. Yanosky, and Melinda C. Power

#### **Table of Contents**

**Table 1.** Summary of study characteristics for eligible studies on air pollution and late-life cognitive health identified through December 31, 2020 (**also available in the manuscript, in alternate format**).

**Table 2.** Summary of quality assessment for eligible studies on air pollution and late-life cognitive health identified through December 31, 2020 (**also available in the manuscript, in alternate format**).

**Appendix A.** Original PubMed and EMBASE Search Criteria with Updated Search Dates

**Appendix B.** New PubMed and EMBASE Search Criteria to Improve Identification of Articles Reporting on Neuroimaging Outcomes

**Appendix C.** Information Abstracted on Each Eligible Article

**Appendix D.** Citations for Articles for Full-Text Review

**Table S1.** Associations between air pollution exposure and cognitive level in qualifying studies.

**Table S2.** Associations between air pollution exposure and cognitive change in qualifying studies.

**Table S3.** Associations between air pollution exposure and incident dementia/cognitive impairment in qualifying studies.

**Table S4.** Associations between air pollution exposure and neuroimaging outcomes in qualifying studies.

**Table S5.** Associations between traffic-related air pollution exposure and cognitive level in qualifying studies.

**Table S6.** Associations between traffic-related air pollution exposure and cognitive change in qualifying studies.

**Table S7.** Associations between traffic-related air pollution exposure and incident dementia/cognitive impairment in qualifying studies.

**Table S8.** Associations between traffic-related air pollution exposure and neuroimaging outcomes in qualifying studies.

**Figure S1.** Flowchart for identification of eligible articles for inclusion in this systematic review.

**Figure S2.** Associations between NO<sub>2</sub> exposure and cognitive level in qualifying studies.

**Figure S3.** Associations between PM<sub>2.5</sub> exposure and cognitive level in qualifying studies.

**Figure S4.** Associations between PM<sub>2.5</sub> exposure and cognitive change in qualifying studies.

**Figure S5.** Associations between PM<sub>2.5</sub> exposure and MRI volumetric outcomes in qualifying studies.

**Figure S6.** Associations between PM<sub>2.5</sub> exposure and MRI cerebrovascular outcomes in qualifying studies.

**Figure S7.** Associations between PM<sub>10</sub> exposure and cognitive level in qualifying studies.
